# Supplementary material for: On the molecular structure and geometry of pyridylalkylamine–H+ complexes: application to catalytic enantioselective hydroxyalkylation of indoles
Source: Royal Society of Chemistry journal article supplement (doi:10.1039/c3nj00310h), 2013-01-01
Supplement: c3nj00310h.pdf [file c3nj00310h.pdf]

# On the molecular structure and geometry of pyridylalkylamine–H<sup>+</sup> complexes. Application to catalytic enantioselective hydroxyalkylation of indoles

Sylvain Marque,\* Vanessa Razafimahaleo, Aurelia Dinut, Guillaume Grach, Damien Prim, Xavier Moreau, and Richard Gil

<sup>a</sup> Université de Versailles-St-Quentin (UVSQ), Institut Lavoisier de Versailles (ILV) UMR CNRS 8180, 45 Avenue des Etats-Unis, 78 035 Versailles Cedex, France. Fax: (+33) 1 39 25 44 52; Tel: (+33) 1 39 25 44 40; E-mail: sylvain.marque@chimie.uvsq.fr

<sup>b</sup> Université Paris-Sud, Institut de Chimie Moléculaire et des Matériaux d'Orsay (ICMMO), Équipe de catalyse moléculaire, bâtiment 420, 91 405 Orsay Cedex, France.

## Supporting Information

### Contents

#### *Analytical*

|                                      |    |
|--------------------------------------|----|
| General.....                         | S2 |
| HPLC Chromatogram of <b>A</b> .....  | S2 |
| <sup>1</sup> H NMR of <b>A</b> ..... | S3 |
| <sup>1</sup> H NMR of <b>B</b> ..... | S4 |
| <sup>1</sup> H NMR of <b>C</b> ..... | S5 |

#### *Calculation part (T = 298.15 K, P = 1 atm)*

|                                                                                                        |     |
|--------------------------------------------------------------------------------------------------------|-----|
| Cartesian coordinates of the (R,S)- <b>1</b> species.....                                              | S6  |
| Cartesian coordinates of the ammonium-(R,S)- <b>1</b> species.....                                     | S8  |
| Cartesian coordinates of the pyridinium-(R,S)- <b>1</b> species.....                                   | S10 |
| Cartesian coordinates of the (S,S)- <b>1</b> species.....                                              | S12 |
| Cartesian coordinates of the ammonium-(S,S)- <b>1</b> species.....                                     | S14 |
| Cartesian coordinates of the pyridinium-(S,S)- <b>1</b> species.....                                   | S16 |
| Cartesian coordinates of the TS for the proton transfer of the protonated (R,S)- <b>1</b> species..... | S18 |
| Cartesian coordinates of the TS for the proton transfer of the protonated (S,S)- <b>1</b> species..... | S20 |
| Cartesian coordinates of the (R,S)- <b>2</b> species.....                                              | S22 |
| Cartesian coordinates of the ammonium-(R,S)- <b>2</b> species.....                                     | S24 |
| Cartesian coordinates of the pyridinium-(R,S)- <b>2</b> species.....                                   | S26 |
| Cartesian coordinates of the (S,S)- <b>2</b> species.....                                              | S28 |
| Cartesian coordinates of the ammonium-(S,S)- <b>2</b> species.....                                     | S30 |
| Cartesian coordinates of the pyridinium-(S,S)- <b>2</b> species.....                                   | S32 |
| Cartesian coordinates of the TS for the proton transfer of the protonated (R,S)- <b>2</b> species..... | S34 |
| Cartesian coordinates of the TS for the proton transfer of the protonated (S,S)- <b>2</b> species..... | S36 |
| Relaxed scans of protonated (R,S) and (S,S)- <b>2</b> species.....                                     | S38 |
| Tables of results in energies in hartrees.....                                                         | S39 |
| Tables of results in energies in kJ.mol <sup>-1</sup> .....                                            | S41 |
| Thermodynamic equilibrium constants.....                                                               | S43 |
| Define of the geometric parameters.....                                                                | S44 |
| Tables of results for the geometric parameters.....                                                    | S44 |
| Example of Gaussian 09 input file.....                                                                 | S46 |

## Analytical

### General

Enantiomeric excesses (ee) were determined by chiral HPLC analyses on:

CHIRALPAK IA column 250 × 4.6 (L × I.D.) 5 μm, hexane/propan-2-ol at, 254 nm, 20 °C  
- for **A** hex/iPrOH v/v: 9/1, 0.5 mL.min<sup>-1</sup> 18.64 min (*S*), 21.72 min (*R*);  
- for **B** hex/iPrOH v/v: 85/15, 0.7 mL.min<sup>-1</sup> 13.05 min (major), 15.85 min (minor);  
- for **C** hex/iPrOH v/v: 85/15, 0.7 mL.min<sup>-1</sup> 11.92 min (minor), 14.55 min (major);

OD-H column, heptane/propan-2-ol (85/15, 1.0 mL.min<sup>-1</sup>), with a UV/Vis detector at 30°C  
- for **A** 6.282 min (*S*), 8.335 min (*R*);  
- for **B** 7.563 min (major), 8.535 min (minor);  
- for **C** 7.828 min (minor), 9.397 min (major).

A sample was prepared with 3 mL (C = 1 g.mL) of a mixture of Hept/iPrOH: 85/15 in a glass vial, then injected in the HPLC device to determine the enantiomeric excess.

### HPLC Chromatogram of A

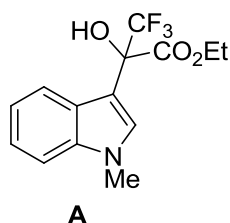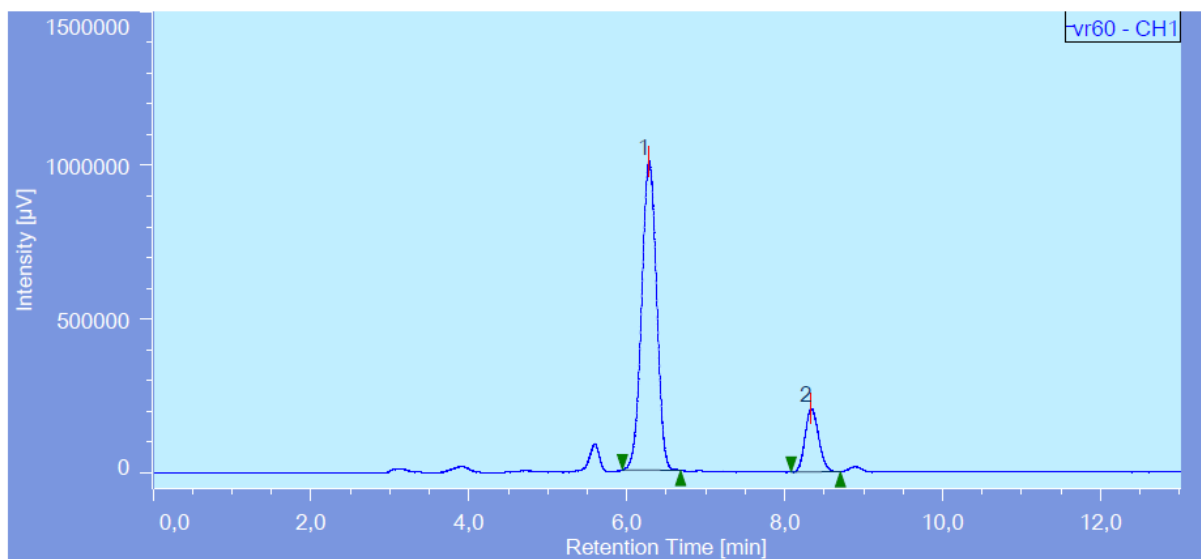

### Conditions

Volume: 20,00 μL

Acquisition Sequence: OD H with Heptane/isopropanol 85/15, 1.0 mL.min<sup>-1</sup>

### Decision

| Peak | t <sub>R</sub> (min) | Area (μV.s) | Height (μV) | Area (%) | Height (%) | Symmetry Factor |
|------|----------------------|-------------|-------------|----------|------------|-----------------|
| 1    | 6.282                | 13187158    | 1002981     | 84.221   | 82.936     | 0.985           |
| 2    | 8.335                | 2470646     | 206364      | 15.779   | 17.064     | 1.128           |

<sup>1</sup>H NMR of A

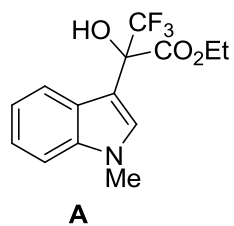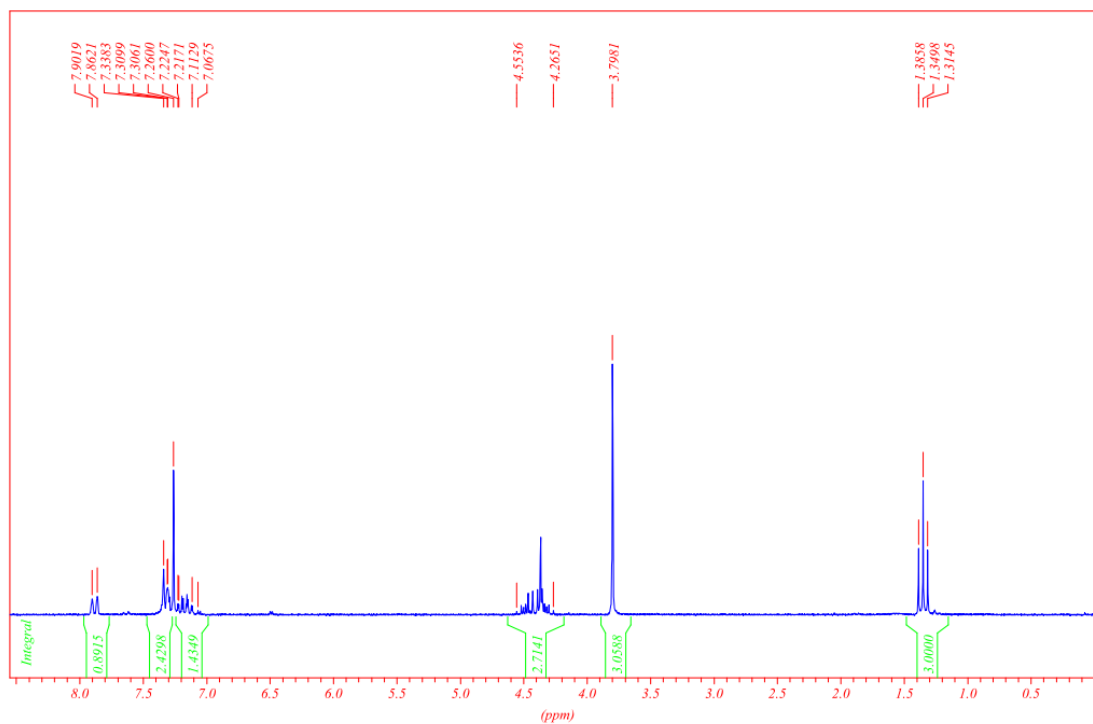

# <sup>1</sup>H NMR of B

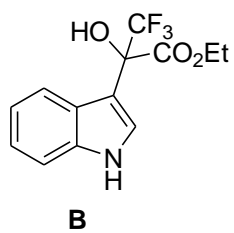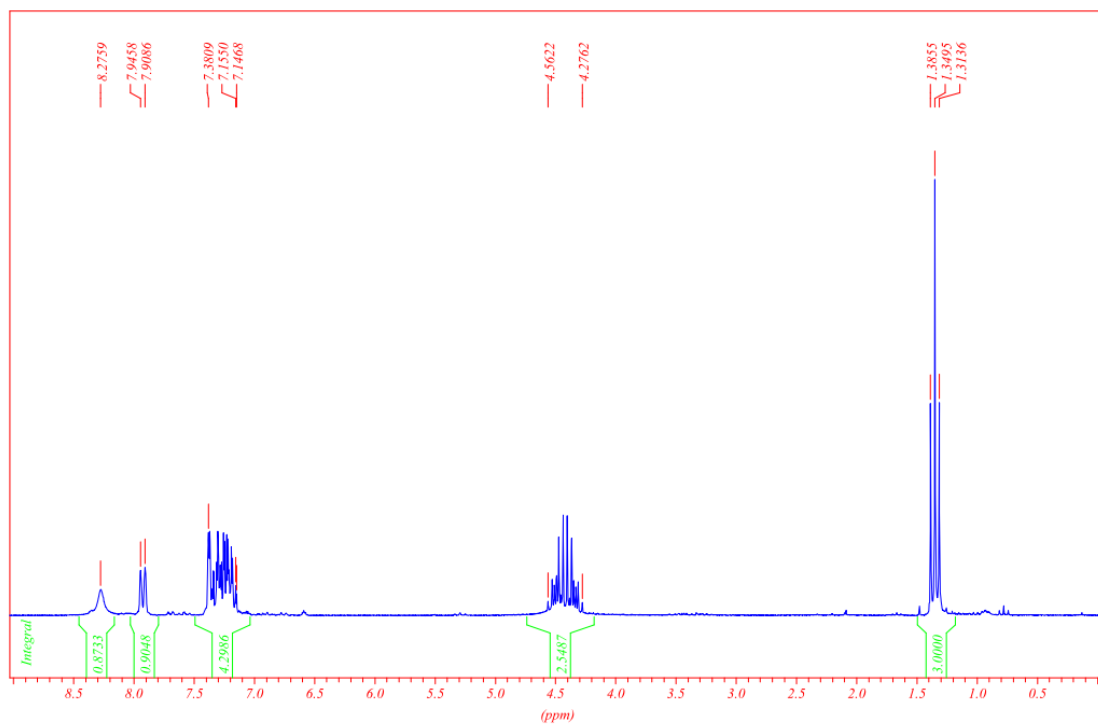

$^1\text{H}$  NMR of **C**

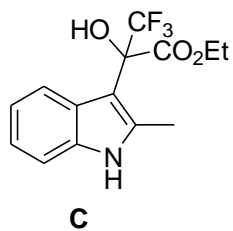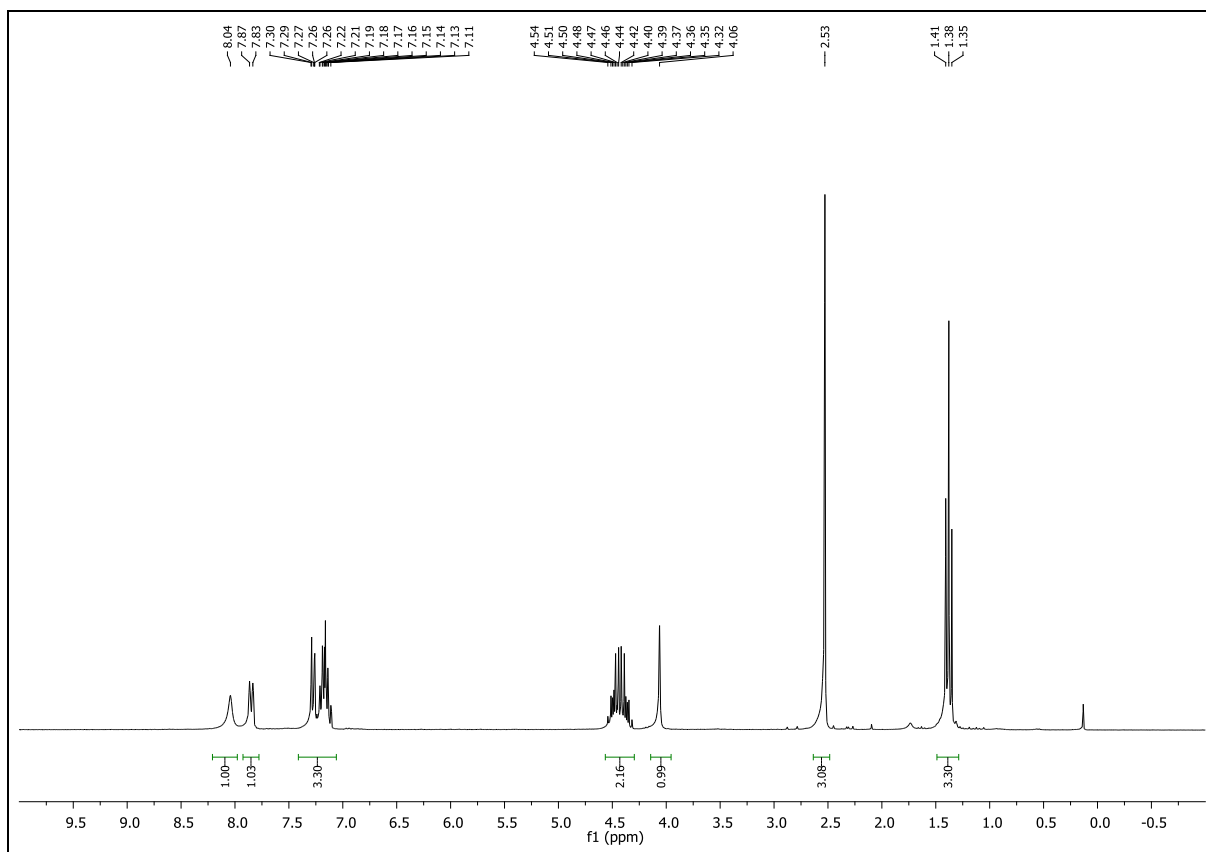

## Calculation part ( $T = 298.15\text{ K}$ , $P = 1\text{ atm}$ )

Images of the optimized geometries are given above the corresponding Cartesian coordinates

Cartesian coordinates of the (*R,S*)-1 species

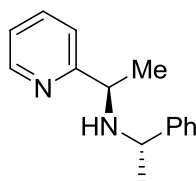

(*R,S*)-1

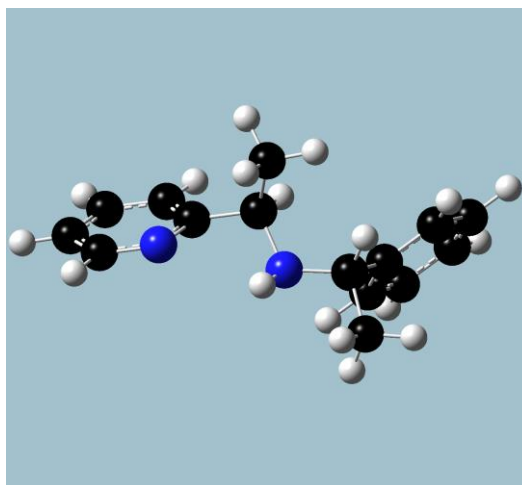

B3LYP/6-31+G(d), gas phase

| Center Number | Atomic Number | Atomic Type | Coordinates (Angstroms) |           |           |
|---------------|---------------|-------------|-------------------------|-----------|-----------|
|               |               |             | X                       | Y         | Z         |
| 1             | 6             | 0           | 0.751064                | 0.338634  | 0.742307  |
| 2             | 7             | 0           | 0.123079                | 1.022536  | -0.397666 |
| 3             | 1             | 0           | 0.728638                | 1.786079  | -0.693686 |
| 4             | 6             | 0           | -1.256189               | 1.487725  | -0.229089 |
| 5             | 1             | 0           | -1.383585               | 2.096536  | 0.684131  |
| 6             | 6             | 0           | -1.614441               | 2.387436  | -1.425253 |
| 7             | 1             | 0           | -2.645306               | 2.747206  | -1.341241 |
| 8             | 1             | 0           | -0.950779               | 3.261344  | -1.465464 |
| 9             | 1             | 0           | -1.514961               | 1.833629  | -2.365255 |
| 10            | 6             | 0           | -2.226560               | 0.314078  | -0.126036 |
| 11            | 6             | 0           | -3.289091               | 0.350269  | 0.786136  |
| 12            | 6             | 0           | -2.106592               | -0.799068 | -0.971556 |
| 13            | 6             | 0           | -4.218387               | -0.693192 | 0.850995  |
| 14            | 1             | 0           | -3.390882               | 1.203460  | 1.455115  |
| 15            | 6             | 0           | -3.030828               | -1.844265 | -0.908889 |
| 16            | 1             | 0           | -1.274320               | -0.839821 | -1.669117 |
| 17            | 6             | 0           | -4.091724               | -1.795303 | 0.002144  |
| 18            | 1             | 0           | -5.035347               | -0.646139 | 1.567204  |
| 19            | 1             | 0           | -2.922954               | -2.700119 | -1.571426 |
| 20            | 1             | 0           | -4.809812               | -2.610202 | 0.051315  |
| 21            | 6             | 0           | 2.128007                | -0.134136 | 0.299881  |
| 22            | 6             | 0           | 2.510545                | -1.478587 | 0.386773  |
| 23            | 6             | 0           | 3.794022                | -1.847328 | -0.017145 |
| 24            | 1             | 0           | 1.809147                | -2.220092 | 0.760099  |
| 25            | 6             | 0           | 4.184884                | 0.452153  | -0.555437 |
| 26            | 6             | 0           | 4.655519                | -0.861969 | -0.500847 |
| 27            | 1             | 0           | 4.113236                | -2.885094 | 0.040422  |
| 28            | 1             | 0           | 4.822239                | 1.252140  | -0.929181 |
| 29            | 1             | 0           | 5.663333                | -1.099693 | -0.829268 |
| 30            | 7             | 0           | 2.957983                | 0.815313  | -0.164121 |
| 31            | 1             | 0           | 0.143020                | -0.547029 | 0.961844  |
| 32            | 6             | 0           | 0.870777                | 1.180103  | 2.032681  |
| 33            | 1             | 0           | 1.479306                | 2.073096  | 1.849827  |
| 34            | 1             | 0           | -0.113999               | 1.491953  | 2.396843  |
| 35            | 1             | 0           | 1.349543                | 0.598497  | 2.830347  |

B3LYP/6-31+G(d), CH<sub>2</sub>Cl<sub>2</sub> (PCM-UFF)

| Center Number | Atomic Number | Atomic Type | Coordinates (Angstroms) |           |           |
|---------------|---------------|-------------|-------------------------|-----------|-----------|
|               |               |             | X                       | Y         | Z         |
| 1             | 6             | 0           | 0.753190                | 0.349959  | 0.733071  |
| 2             | 7             | 0           | 0.123144                | 1.047208  | -0.401880 |
| 3             | 1             | 0           | 0.710792                | 1.840041  | -0.655975 |
| 4             | 6             | 0           | -1.264475               | 1.496698  | -0.218835 |
| 5             | 1             | 0           | -1.387652               | 2.088764  | 0.703917  |
| 6             | 6             | 0           | -1.636916               | 2.413592  | -1.397117 |
| 7             | 1             | 0           | -2.666495               | 2.772263  | -1.294003 |
| 8             | 1             | 0           | -0.974187               | 3.287953  | -1.430967 |
| 9             | 1             | 0           | -1.549511               | 1.875916  | -2.347941 |
| 10            | 6             | 0           | -2.225227               | 0.314629  | -0.125680 |
| 11            | 6             | 0           | -3.247538               | 0.308204  | 0.833176  |
| 12            | 6             | 0           | -2.141845               | -0.762414 | -1.021999 |
| 13            | 6             | 0           | -4.171089               | -0.741813 | 0.895362  |
| 14            | 1             | 0           | -3.322526               | 1.132371  | 1.540418  |
| 15            | 6             | 0           | -3.059476               | -1.814594 | -0.962652 |
| 16            | 1             | 0           | -1.345922               | -0.773899 | -1.761520 |
| 17            | 6             | 0           | -4.079643               | -1.808155 | -0.003631 |
| 18            | 1             | 0           | -4.955706               | -0.727532 | 1.648087  |
| 19            | 1             | 0           | -2.978389               | -2.641499 | -1.664406 |
| 20            | 1             | 0           | -4.792617               | -2.627556 | 0.043337  |
| 21            | 6             | 0           | 2.128711                | -0.129153 | 0.291214  |
| 22            | 6             | 0           | 2.503371                | -1.474994 | 0.392629  |
| 23            | 6             | 0           | 3.785177                | -1.857307 | -0.006054 |
| 24            | 1             | 0           | 1.798643                | -2.208028 | 0.775610  |
| 25            | 6             | 0           | 4.193395                | 0.433914  | -0.569003 |
| 26            | 6             | 0           | 4.654145                | -0.882902 | -0.499695 |
| 27            | 1             | 0           | 4.096975                | -2.896159 | 0.063762  |
| 28            | 1             | 0           | 4.838407                | 1.223586  | -0.950581 |
| 29            | 1             | 0           | 5.660424                | -1.130575 | -0.824307 |
| 30            | 7             | 0           | 2.966380                | 0.810868  | -0.182756 |
| 31            | 1             | 0           | 0.142765                | -0.535131 | 0.945156  |
| 32            | 6             | 0           | 0.871892                | 1.180335  | 2.030246  |
| 33            | 1             | 0           | 1.474329                | 2.079422  | 1.855797  |
| 34            | 1             | 0           | -0.112942               | 1.485048  | 2.399528  |
| 35            | 1             | 0           | 1.354924                | 0.592484  | 2.820334  |

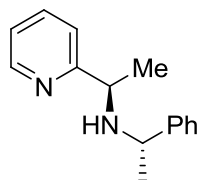

(R,S)-1

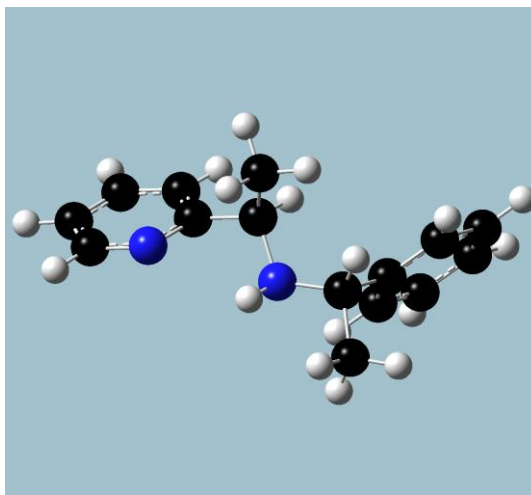

B3LYP/6-31+G(d,p), CH<sub>2</sub>Cl<sub>2</sub> (PCM-UFF)

| Center Number | Atomic Number | Atomic Type | Coordinates (Angstroms) |           |           |
|---------------|---------------|-------------|-------------------------|-----------|-----------|
|               |               |             | X                       | Y         | Z         |
| 1             | 6             | 0           | 0.753416                | 0.348941  | 0.734257  |
| 2             | 7             | 0           | 0.122015                | 1.046377  | -0.398815 |
| 3             | 1             | 0           | 0.710482                | 1.834796  | -0.659031 |
| 4             | 6             | 0           | -1.264714               | 1.496019  | -0.215812 |
| 5             | 1             | 0           | -1.389796               | 2.084506  | 0.708382  |
| 6             | 6             | 0           | -1.636427               | 2.415876  | -1.391627 |
| 7             | 1             | 0           | -2.664636               | 2.774609  | -1.287912 |
| 8             | 1             | 0           | -0.973252               | 3.288418  | -1.423288 |
| 9             | 1             | 0           | -1.549224               | 1.879961  | -2.342297 |
| 10            | 6             | 0           | -2.225860               | 0.313977  | -0.125138 |
| 11            | 6             | 0           | -3.252598               | 0.309183  | 0.828806  |
| 12            | 6             | 0           | -2.137441               | -0.764516 | -1.018995 |
| 13            | 6             | 0           | -4.175674               | -0.741092 | 0.888400  |
| 14            | 1             | 0           | -3.330904               | 1.134152  | 1.533503  |
| 15            | 6             | 0           | -3.054602               | -1.816947 | -0.961807 |
| 16            | 1             | 0           | -1.337843               | -0.776299 | -1.753477 |
| 17            | 6             | 0           | -4.079246               | -1.809008 | -0.007915 |
| 18            | 1             | 0           | -4.963399               | -0.726003 | 1.636631  |
| 19            | 1             | 0           | -2.969828               | -2.644717 | -1.660796 |
| 20            | 1             | 0           | -4.791387               | -2.628098 | 0.037354  |
| 21            | 6             | 0           | 2.128534                | -0.129294 | 0.291122  |
| 22            | 6             | 0           | 2.506687                | -1.473594 | 0.398740  |
| 23            | 6             | 0           | 3.788283                | -1.854476 | -0.000911 |
| 24            | 1             | 0           | 1.804838                | -2.205490 | 0.786795  |
| 25            | 6             | 0           | 4.189854                | 0.434650  | -0.576680 |
| 26            | 6             | 0           | 4.653538                | -0.880547 | -0.501469 |
| 27            | 1             | 0           | 4.102765                | -2.891382 | 0.073343  |
| 28            | 1             | 0           | 4.832666                | 1.222615  | -0.963772 |
| 29            | 1             | 0           | 5.658885                | -1.127211 | -0.826910 |
| 30            | 7             | 0           | 2.962548                | 0.810433  | -0.189452 |
| 31            | 1             | 0           | 0.145181                | -0.537007 | 0.947326  |
| 32            | 6             | 0           | 0.873264                | 1.178881  | 2.031576  |
| 33            | 1             | 0           | 1.479195                | 2.074237  | 1.856792  |
| 34            | 1             | 0           | -0.110060               | 1.487157  | 2.398532  |
| 35            | 1             | 0           | 1.352301                | 0.589761  | 2.821404  |

B3LYP/6-31+G(d,p), CH<sub>2</sub>Cl<sub>2</sub> (CPCM-Bondi)

| Center Number | Atomic Number | Atomic Type | Coordinates (Angstroms) |           |           |
|---------------|---------------|-------------|-------------------------|-----------|-----------|
|               |               |             | X                       | Y         | Z         |
| 1             | 6             | 0           | 0.756723                | 0.444385  | 0.739344  |
| 2             | 7             | 0           | 0.117835                | 1.109381  | -0.413918 |
| 3             | 1             | 0           | 0.673027                | 1.927073  | -0.659375 |
| 4             | 6             | 0           | -1.285991               | 1.521509  | -0.232827 |
| 5             | 1             | 0           | -1.420961               | 2.107643  | 0.689845  |
| 6             | 6             | 0           | -1.683359               | 2.427216  | -1.410460 |
| 7             | 1             | 0           | -2.719804               | 2.760692  | -1.302908 |
| 8             | 1             | 0           | -1.040686               | 3.314676  | -1.445217 |
| 9             | 1             | 0           | -1.587224               | 1.892033  | -2.361011 |
| 10            | 6             | 0           | -2.211452               | 0.312452  | -0.131934 |
| 11            | 6             | 0           | -3.177064               | 0.245058  | 0.882193  |
| 12            | 6             | 0           | -2.150134               | -0.732915 | -1.067775 |
| 13            | 6             | 0           | -4.065476               | -0.834335 | 0.961622  |
| 14            | 1             | 0           | -3.233746               | 1.043465  | 1.618565  |
| 15            | 6             | 0           | -3.032627               | -1.813923 | -0.991623 |
| 16            | 1             | 0           | -1.402835               | -0.700256 | -1.855133 |
| 17            | 6             | 0           | -3.995213               | -1.869058 | 0.024289  |
| 18            | 1             | 0           | -4.804864               | -0.867566 | 1.757141  |
| 19            | 1             | 0           | -2.969550               | -2.614220 | -1.724058 |
| 20            | 1             | 0           | -4.680019               | -2.710245 | 0.084347  |
| 21            | 6             | 0           | 2.108483                | -0.098807 | 0.298132  |
| 22            | 6             | 0           | 2.427840                | -1.455682 | 0.436529  |
| 23            | 6             | 0           | 3.686063                | -1.904931 | 0.032723  |
| 24            | 1             | 0           | 1.698210                | -2.144036 | 0.851793  |
| 25            | 6             | 0           | 4.186081                | 0.348067  | -0.606430 |
| 26            | 6             | 0           | 4.589072                | -0.984838 | -0.502735 |
| 27            | 1             | 0           | 3.953772                | -2.952924 | 0.130857  |
| 28            | 1             | 0           | 4.859815                | 1.095364  | -1.020068 |
| 29            | 1             | 0           | 5.578067                | -1.285281 | -0.832976 |
| 30            | 7             | 0           | 2.980315                | 0.789477  | -0.215438 |
| 31            | 1             | 0           | 0.129002                | -0.413806 | 1.000530  |
| 32            | 6             | 0           | 0.915141                | 1.330288  | 1.993130  |
| 33            | 1             | 0           | 1.541318                | 2.201284  | 1.771375  |
| 34            | 1             | 0           | -0.056414               | 1.681948  | 2.352392  |
| 35            | 1             | 0           | 1.387311                | 0.765230  | 2.804329  |

Cartesian coordinates of the ammonium-(*R,S*)-1 species

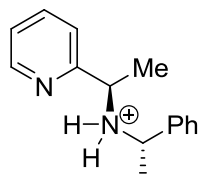

(*R,S*)-Ammonium 1

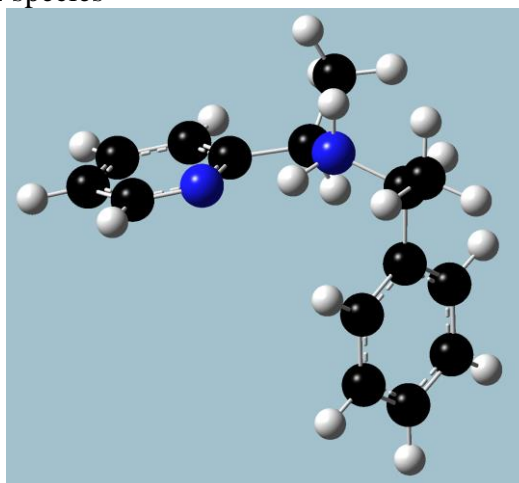

B3LYP/6-31+G(d), gas phase

| Center Number | Atomic Number | Atomic Type | Coordinates (Angstroms) |           |           |
|---------------|---------------|-------------|-------------------------|-----------|-----------|
|               |               |             | X                       | Y         | Z         |
| 1             | 6             | 0           | -0.793479               | 1.060498  | -0.703671 |
| 2             | 7             | 0           | -0.047809               | 1.413160  | 0.568779  |
| 3             | 1             | 0           | -0.426730               | 2.290468  | 0.942361  |
| 4             | 6             | 0           | 1.478196                | 1.533756  | 0.487556  |
| 5             | 1             | 0           | 1.661279                | 2.261113  | -0.309169 |
| 6             | 6             | 0           | 1.975740                | 2.103586  | 1.818890  |
| 7             | 1             | 0           | 3.059763                | 2.236800  | 1.765587  |
| 8             | 1             | 0           | 1.529127                | 3.082395  | 2.033509  |
| 9             | 1             | 0           | 1.766028                | 1.428937  | 2.655700  |
| 10            | 6             | 0           | 2.092884                | 0.204669  | 0.099111  |
| 11            | 6             | 0           | 2.814413                | 0.101657  | -1.098677 |
| 12            | 6             | 0           | 1.988120                | -0.920734 | 0.932045  |
| 13            | 6             | 0           | 3.423214                | -1.103508 | -1.459934 |
| 14            | 1             | 0           | 2.916129                | 0.969367  | -1.747607 |
| 15            | 6             | 0           | 2.588050                | -2.126716 | 0.566814  |
| 16            | 1             | 0           | 1.446944                | -0.867387 | 1.874702  |
| 17            | 6             | 0           | 3.307586                | -2.219778 | -0.629059 |
| 18            | 1             | 0           | 3.986896                | -1.166817 | -2.386229 |
| 19            | 1             | 0           | 2.501113                | -2.990637 | 1.219453  |
| 20            | 1             | 0           | 3.779871                | -3.157482 | -0.907333 |
| 21            | 6             | 0           | -1.972874               | 0.168017  | -0.298001 |
| 22            | 6             | 0           | -2.990650               | -0.174019 | -1.191715 |
| 23            | 6             | 0           | -3.998960               | -1.031639 | -0.748398 |
| 24            | 1             | 0           | -3.001330               | 0.207238  | -2.207757 |
| 25            | 6             | 0           | -2.905079               | -1.117882 | 1.382036  |
| 26            | 6             | 0           | -3.960023               | -1.513444 | 0.561540  |
| 27            | 1             | 0           | -4.803765               | -1.318839 | -1.418819 |
| 28            | 1             | 0           | -2.828496               | -1.462911 | 2.409653  |
| 29            | 1             | 0           | -4.728165               | -2.179560 | 0.940918  |
| 30            | 7             | 0           | -1.932135               | -0.296961 | 0.958440  |
| 31            | 1             | 0           | -0.087746               | 0.463900  | -1.292117 |
| 32            | 1             | 0           | -0.349259               | 0.676329  | 1.248318  |
| 33            | 6             | 0           | -1.172414               | 2.329897  | -1.467190 |
| 34            | 1             | 0           | -1.620371               | 2.072881  | -2.430414 |
| 35            | 1             | 0           | -1.900138               | 2.931521  | -0.909930 |
| 36            | 1             | 0           | -0.289878               | 2.943134  | -1.679435 |

B3LYP/6-31+G(d), CH<sub>2</sub>Cl<sub>2</sub> (PCM-UFF)

| Center Number | Atomic Number | Atomic Type | Coordinates (Angstroms) |           |           |
|---------------|---------------|-------------|-------------------------|-----------|-----------|
|               |               |             | X                       | Y         | Z         |
| 1             | 6             | 0           | -0.803069               | 1.084743  | -0.676212 |
| 2             | 7             | 0           | -0.039916               | 1.427490  | 0.587998  |
| 3             | 1             | 0           | -0.405018               | 2.306306  | 0.972208  |
| 4             | 6             | 0           | 1.481539                | 1.540876  | 0.475706  |
| 5             | 1             | 0           | 1.653948                | 2.259954  | -0.328907 |
| 6             | 6             | 0           | 2.013718                | 2.116253  | 1.790610  |
| 7             | 1             | 0           | 3.097387                | 2.237686  | 1.710327  |
| 8             | 1             | 0           | 1.577469                | 3.099579  | 1.998571  |
| 9             | 1             | 0           | 1.809234                | 1.453881  | 2.637977  |
| 10            | 6             | 0           | 2.087669                | 0.205449  | 0.087595  |
| 11            | 6             | 0           | 2.758165                | 0.082584  | -1.137537 |
| 12            | 6             | 0           | 2.025010                | -0.905525 | 0.943891  |
| 13            | 6             | 0           | 3.356473                | -1.126909 | -1.503842 |
| 14            | 1             | 0           | 2.819836                | 0.937582  | -1.807089 |
| 15            | 6             | 0           | 2.614445                | -2.116375 | 0.574860  |
| 16            | 1             | 0           | 1.522303                | -0.837392 | 1.905836  |
| 17            | 6             | 0           | 3.282909                | -2.229493 | -0.649135 |
| 18            | 1             | 0           | 3.876373                | -1.204817 | -2.454635 |
| 19            | 1             | 0           | 2.556118                | -2.968937 | 1.245741  |
| 20            | 1             | 0           | 3.745092                | -3.171224 | -0.932028 |
| 21            | 6             | 0           | -1.968830               | 0.175299  | -0.274705 |
| 22            | 6             | 0           | -3.003975               | -0.134239 | -1.162230 |
| 23            | 6             | 0           | -4.001162               | -1.012485 | -0.736904 |
| 24            | 1             | 0           | -3.033559               | 0.289932  | -2.160033 |
| 25            | 6             | 0           | -2.867427               | -1.181306 | 1.366736  |
| 26            | 6             | 0           | -3.936553               | -1.548246 | 0.551426  |
| 27            | 1             | 0           | -4.817211               | -1.273965 | -1.404112 |
| 28            | 1             | 0           | -2.771548               | -1.568520 | 2.377722  |
| 29            | 1             | 0           | -4.694732               | -2.232832 | 0.917614  |
| 30            | 7             | 0           | -1.904098               | -0.340372 | 0.960672  |
| 31            | 1             | 0           | -0.105505               | 0.501170  | -1.285837 |
| 32            | 1             | 0           | -0.321354               | 0.693677  | 1.272793  |
| 33            | 6             | 0           | -1.203679               | 2.356927  | -1.423151 |
| 34            | 1             | 0           | -1.640020               | 2.099563  | -2.391242 |
| 35            | 1             | 0           | -1.941682               | 2.936407  | -0.857918 |
| 36            | 1             | 0           | -0.330431               | 2.986805  | -1.620321 |



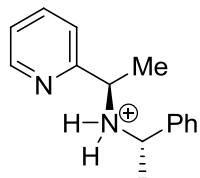

(*R,S*)-Ammonium **1**

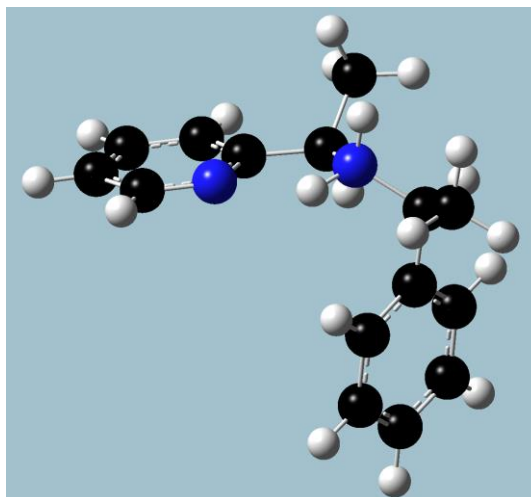

B3LYP/6-31+G(d,p), CH<sub>2</sub>Cl<sub>2</sub> (PCM-UFF)

| Center Number | Atomic Number | Atomic Type | Coordinates (Angstroms) |           |           |
|---------------|---------------|-------------|-------------------------|-----------|-----------|
|               |               |             | X                       | Y         | Z         |
| 1             | 6             | 0           | -0.802954               | 1.105627  | -0.680652 |
| 2             | 7             | 0           | -0.039927               | 1.443616  | 0.583502  |
| 3             | 1             | 0           | -0.397841               | 2.324844  | 0.965315  |
| 4             | 6             | 0           | 1.481478                | 1.544550  | 0.473739  |
| 5             | 1             | 0           | 1.662785                | 2.260817  | -0.331021 |
| 6             | 6             | 0           | 2.017176                | 2.116064  | 1.788565  |
| 7             | 1             | 0           | 3.100785                | 2.228186  | 1.709434  |
| 8             | 1             | 0           | 1.589031                | 3.102097  | 1.994778  |
| 9             | 1             | 0           | 1.805921                | 1.456241  | 2.634991  |
| 10            | 6             | 0           | 2.077193                | 0.204218  | 0.085891  |
| 11            | 6             | 0           | 2.746174                | 0.075514  | -1.139317 |
| 12            | 6             | 0           | 2.004141                | -0.906073 | 0.942047  |
| 13            | 6             | 0           | 3.332689                | -1.139461 | -1.505887 |
| 14            | 1             | 0           | 2.815544                | 0.929546  | -1.808129 |
| 15            | 6             | 0           | 2.581829                | -2.122172 | 0.572531  |
| 16            | 1             | 0           | 1.502311                | -0.833157 | 1.903151  |
| 17            | 6             | 0           | 3.248744                | -2.241265 | -0.651518 |
| 18            | 1             | 0           | 3.851178                | -1.222293 | -2.456115 |
| 19            | 1             | 0           | 2.515661                | -2.973865 | 1.242498  |
| 20            | 1             | 0           | 3.701375                | -3.186652 | -0.934618 |
| 21            | 6             | 0           | -1.956491               | 0.182011  | -0.277531 |
| 22            | 6             | 0           | -2.990602               | -0.142923 | -1.160316 |
| 23            | 6             | 0           | -3.974132               | -1.032779 | -0.728478 |
| 24            | 1             | 0           | -3.029021               | 0.278629  | -2.158110 |
| 25            | 6             | 0           | -2.830812               | -1.182124 | 1.371688  |
| 26            | 6             | 0           | -3.897522               | -1.564367 | 0.560887  |
| 27            | 1             | 0           | -4.788985               | -1.306595 | -1.390976 |
| 28            | 1             | 0           | -2.726968               | -1.565793 | 2.382566  |
| 29            | 1             | 0           | -4.644868               | -2.257295 | 0.931242  |
| 30            | 7             | 0           | -1.880484               | -0.329316 | 0.958842  |
| 31            | 1             | 0           | -0.105237               | 0.531061  | -1.298049 |
| 32            | 1             | 0           | -0.334881               | 0.707187  | 1.262594  |
| 33            | 6             | 0           | -1.220211               | 2.377354  | -1.418177 |
| 34            | 1             | 0           | -1.664506               | 2.120338  | -2.381582 |
| 35            | 1             | 0           | -1.955591               | 2.948537  | -0.843258 |
| 36            | 1             | 0           | -0.354029               | 3.013025  | -1.621954 |

B3LYP/6-31+G(d,p), CH<sub>2</sub>Cl<sub>2</sub> (CPCM-Bondi)

| Center Number | Atomic Number | Atomic Type | Coordinates (Angstroms) |           |           |
|---------------|---------------|-------------|-------------------------|-----------|-----------|
|               |               |             | X                       | Y         | Z         |
| 1             | 6             | 0           | -0.810203               | 1.107821  | -0.687044 |
| 2             | 7             | 0           | -0.025550               | 1.478379  | 0.552922  |
| 3             | 1             | 0           | -0.362239               | 2.381794  | 0.900287  |
| 4             | 6             | 0           | 1.491360                | 1.556889  | 0.406279  |
| 5             | 1             | 0           | 1.660307                | 2.230811  | -0.436319 |
| 6             | 6             | 0           | 2.067396                | 2.186781  | 1.676386  |
| 7             | 1             | 0           | 3.150365                | 2.279094  | 1.563809  |
| 8             | 1             | 0           | 1.654581                | 3.187237  | 1.839612  |
| 9             | 1             | 0           | 1.864966                | 1.572464  | 2.558456  |
| 10            | 6             | 0           | 2.074223                | 0.195214  | 0.071671  |
| 11            | 6             | 0           | 2.736073                | 0.012326  | -1.150914 |
| 12            | 6             | 0           | 2.005964                | -0.878866 | 0.974304  |
| 13            | 6             | 0           | 3.321452                | -1.217748 | -1.468888 |
| 14            | 1             | 0           | 2.798026                | 0.836503  | -1.856605 |
| 15            | 6             | 0           | 2.582698                | -2.110270 | 0.654327  |
| 16            | 1             | 0           | 1.504838                | -0.763395 | 1.931399  |
| 17            | 6             | 0           | 3.243873                | -2.282527 | -0.567246 |
| 18            | 1             | 0           | 3.833449                | -1.341546 | -2.418482 |
| 19            | 1             | 0           | 2.519785                | -2.932679 | 1.360677  |
| 20            | 1             | 0           | 3.695429                | -3.239344 | -0.811876 |
| 21            | 6             | 0           | -1.950208               | 0.177549  | -0.268150 |
| 22            | 6             | 0           | -2.913247               | -0.249749 | -1.189835 |
| 23            | 6             | 0           | -3.906717               | -1.126448 | -0.755880 |
| 24            | 1             | 0           | -2.885295               | 0.085651  | -2.220518 |
| 25            | 6             | 0           | -2.910317               | -1.075190 | 1.421723  |
| 26            | 6             | 0           | -3.911396               | -1.548204 | 0.576579  |
| 27            | 1             | 0           | -4.665474               | -1.476415 | -1.448765 |
| 28            | 1             | 0           | -2.868992               | -1.376937 | 2.464713  |
| 29            | 1             | 0           | -4.668602               | -2.227854 | 0.952016  |
| 30            | 7             | 0           | -1.948746               | -0.232320 | 1.007985  |
| 31            | 1             | 0           | -0.121553               | 0.538767  | -1.318192 |
| 32            | 1             | 0           | -0.308916               | 0.789629  | 1.276269  |
| 33            | 6             | 0           | -1.263123               | 2.368228  | -1.427032 |
| 34            | 1             | 0           | -1.742331               | 2.094420  | -2.369070 |
| 35            | 1             | 0           | -1.979016               | 2.939428  | -0.827370 |
| 36            | 1             | 0           | -0.406229               | 3.005117  | -1.664063 |

Cartesian coordinates of the pyridinium-(*R,S*)-1 species

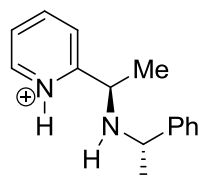

(*R,S*)-Pyridinium 1

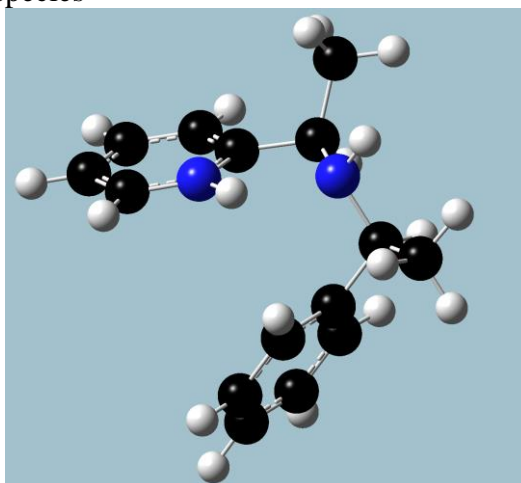

B3LYP/6-31+G(d), gas phase

| Center Number | Atomic Number | Atomic Type | Coordinates (Angstroms) |           |           |
|---------------|---------------|-------------|-------------------------|-----------|-----------|
|               |               |             | X                       | Y         | Z         |
| 1             | 6             | 0           | 1.016092                | 1.618381  | 0.526685  |
| 2             | 7             | 0           | -0.050508               | 1.871477  | -0.450478 |
| 3             | 1             | 0           | 0.056096                | 2.806558  | -0.837437 |
| 4             | 6             | 0           | -1.451010               | 1.705354  | 0.043894  |
| 5             | 1             | 0           | -1.526243               | 2.150261  | 1.049054  |
| 6             | 6             | 0           | -2.394580               | 2.482137  | -0.881711 |
| 7             | 1             | 0           | -3.429467               | 2.363397  | -0.548335 |
| 8             | 1             | 0           | -2.158695               | 3.553365  | -0.867730 |
| 9             | 1             | 0           | -2.329295               | 2.131488  | -1.917083 |
| 10            | 6             | 0           | -1.810543               | 0.229068  | 0.170379  |
| 11            | 6             | 0           | -1.950403               | -0.357358 | 1.435025  |
| 12            | 6             | 0           | -2.020813               | -0.571509 | -0.965226 |
| 13            | 6             | 0           | -2.281528               | -1.710757 | 1.569149  |
| 14            | 1             | 0           | -1.819817               | 0.251862  | 2.327594  |
| 15            | 6             | 0           | -2.354933               | -1.921240 | -0.836611 |
| 16            | 1             | 0           | -1.953015               | -0.134013 | -1.959447 |
| 17            | 6             | 0           | -2.482167               | -2.496592 | 0.433050  |
| 18            | 1             | 0           | -2.395292               | -2.143316 | 2.559489  |
| 19            | 1             | 0           | -2.536650               | -2.520246 | -1.725445 |
| 20            | 1             | 0           | -2.753361               | -3.543932 | 0.532865  |
| 21            | 6             | 0           | 1.705443                | 0.293027  | 0.204537  |
| 22            | 6             | 0           | 2.636568                | -0.365944 | 1.006658  |
| 23            | 6             | 0           | 3.203793                | -1.557951 | 0.558000  |
| 24            | 1             | 0           | 2.905479                | 0.050506  | 1.971938  |
| 25            | 6             | 0           | 1.907640                | -1.413018 | -1.450970 |
| 26            | 6             | 0           | 2.841245                | -2.089977 | -0.688847 |
| 27            | 1             | 0           | 3.927686                | -2.078968 | 1.177829  |
| 28            | 1             | 0           | 1.551274                | -1.750539 | -2.417297 |
| 29            | 1             | 0           | 3.269516                | -3.016154 | -1.055156 |
| 30            | 7             | 0           | 1.386364                | -0.260402 | -0.979386 |
| 31            | 1             | 0           | 0.594253                | 1.516559  | 1.537117  |
| 32            | 1             | 0           | 0.657757                | 0.282546  | -1.476168 |
| 33            | 6             | 0           | 2.048350                | 2.762857  | 0.543885  |
| 34            | 1             | 0           | 2.872805                | 2.553373  | 1.232072  |
| 35            | 1             | 0           | 2.472124                | 2.922238  | -0.454513 |
| 36            | 1             | 0           | 1.564932                | 3.688616  | 0.872325  |

B3LYP/6-31+G(d), CH<sub>2</sub>Cl<sub>2</sub> (PCM-UFF)

| Center Number | Atomic Number | Atomic Type | Coordinates (Angstroms) |           |           |
|---------------|---------------|-------------|-------------------------|-----------|-----------|
|               |               |             | X                       | Y         | Z         |
| 1             | 6             | 0           | -0.787955               | 1.162804  | -0.619623 |
| 2             | 7             | 0           | -0.035246               | 1.388881  | 0.624852  |
| 3             | 1             | 0           | -0.391322               | 2.229408  | 1.081143  |
| 4             | 6             | 0           | 1.434439                | 1.530043  | 0.464801  |
| 5             | 1             | 0           | 1.657860                | 2.251535  | -0.336810 |
| 6             | 6             | 0           | 2.012968                | 2.092297  | 1.770795  |
| 7             | 1             | 0           | 3.095811                | 2.220138  | 1.678209  |
| 8             | 1             | 0           | 1.574467                | 3.071344  | 2.000156  |
| 9             | 1             | 0           | 1.816060                | 1.418397  | 2.611721  |
| 10            | 6             | 0           | 2.078016                | 0.204215  | 0.078136  |
| 11            | 6             | 0           | 2.883952                | 0.121617  | -1.065386 |
| 12            | 6             | 0           | 1.915431                | -0.944610 | 0.868794  |
| 13            | 6             | 0           | 3.517077                | -1.076973 | -1.414206 |
| 14            | 1             | 0           | 3.020408                | 1.003003  | -1.688810 |
| 15            | 6             | 0           | 2.542606                | -2.143880 | 0.523437  |
| 16            | 1             | 0           | 1.298961                | -0.900392 | 1.763226  |
| 17            | 6             | 0           | 3.346430                | -2.214074 | -0.620819 |
| 18            | 1             | 0           | 4.138456                | -1.120028 | -2.305034 |
| 19            | 1             | 0           | 2.407750                | -3.023205 | 1.148326  |
| 20            | 1             | 0           | 3.834989                | -3.147176 | -0.888938 |
| 21            | 6             | 0           | -1.952694               | 0.218542  | -0.327773 |
| 22            | 6             | 0           | -2.970400               | -0.138138 | -1.211326 |
| 23            | 6             | 0           | -3.948262               | -1.043369 | -0.799326 |
| 24            | 1             | 0           | -2.993353               | 0.282145  | -2.209664 |
| 25            | 6             | 0           | -2.890307               | -1.210849 | 1.340891  |
| 26            | 6             | 0           | -3.913928               | -1.588003 | 0.491774  |
| 27            | 1             | 0           | -4.740918               | -1.327014 | -1.484568 |
| 28            | 1             | 0           | -2.774992               | -1.571887 | 2.355495  |
| 29            | 1             | 0           | -4.666202               | -2.290021 | 0.831297  |
| 30            | 7             | 0           | -1.963081               | -0.335246 | 0.900797  |
| 31            | 1             | 0           | -0.126929               | 0.618789  | -1.306795 |
| 32            | 1             | 0           | -1.170036               | -0.018116 | 1.482593  |
| 33            | 6             | 0           | -1.252731               | 2.457878  | -1.308208 |
| 34            | 1             | 0           | -1.748808               | 2.257869  | -2.262726 |
| 35            | 1             | 0           | -1.947439               | 3.012952  | -0.667769 |
| 36            | 1             | 0           | -0.384326               | 3.091803  | -1.512358 |

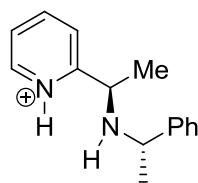

(*R,S*)-Pyridinium 1

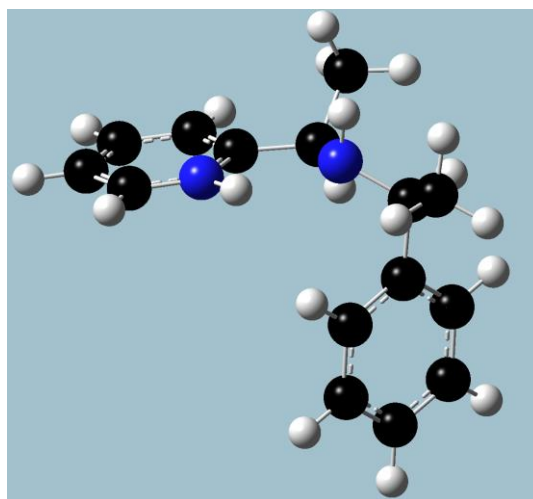

B3LYP/6-31+G(d,p), CH<sub>2</sub>Cl<sub>2</sub> (PCM-UFF)

| Center Number | Atomic Number | Atomic Type | Coordinates (Angstroms) |           |           |
|---------------|---------------|-------------|-------------------------|-----------|-----------|
|               |               |             | X                       | Y         | Z         |
| 1             | 6             | 0           | -0.787340               | 1.171549  | -0.620165 |
| 2             | 7             | 0           | -0.033531               | 1.400319  | 0.622751  |
| 3             | 1             | 0           | -0.385582               | 2.242560  | 1.076111  |
| 4             | 6             | 0           | 1.436992                | 1.534068  | 0.462801  |
| 5             | 1             | 0           | 1.664406                | 2.251384  | -0.340607 |
| 6             | 6             | 0           | 2.018342                | 2.096644  | 1.766862  |
| 7             | 1             | 0           | 3.100552                | 2.219387  | 1.673522  |
| 8             | 1             | 0           | 1.584313                | 3.076926  | 1.993578  |
| 9             | 1             | 0           | 1.818794                | 1.425938  | 2.608366  |
| 10            | 6             | 0           | 2.072787                | 0.204217  | 0.077168  |
| 11            | 6             | 0           | 2.866367                | 0.112556  | -1.074138 |
| 12            | 6             | 0           | 1.913009                | -0.939908 | 0.875077  |
| 13            | 6             | 0           | 3.489616                | -1.090734 | -1.423821 |
| 14            | 1             | 0           | 3.000509                | 0.989901  | -1.702374 |
| 15            | 6             | 0           | 2.530394                | -2.143652 | 0.528665  |
| 16            | 1             | 0           | 1.306909                | -0.888610 | 1.775277  |
| 17            | 6             | 0           | 3.321529                | -2.223081 | -0.623557 |
| 18            | 1             | 0           | 4.101103                | -1.141162 | -2.320077 |
| 19            | 1             | 0           | 2.398092                | -3.018784 | 1.158514  |
| 20            | 1             | 0           | 3.802188                | -3.159138 | -0.892269 |
| 21            | 6             | 0           | -1.946792               | 0.222527  | -0.325749 |
| 22            | 6             | 0           | -2.965330               | -0.138287 | -1.206617 |
| 23            | 6             | 0           | -3.935793               | -1.049708 | -0.792125 |
| 24            | 1             | 0           | -2.993980               | 0.283487  | -2.203418 |
| 25            | 6             | 0           | -2.868742               | -1.214084 | 1.343712  |
| 26            | 6             | 0           | -3.892942               | -1.596026 | 0.497888  |
| 27            | 1             | 0           | -4.729066               | -1.337091 | -1.474072 |
| 28            | 1             | 0           | -2.748768               | -1.576667 | 2.356614  |
| 29            | 1             | 0           | -4.639045               | -2.302708 | 0.838993  |
| 30            | 7             | 0           | -1.948685               | -0.332173 | 0.901680  |
| 31            | 1             | 0           | -0.127782               | 0.627686  | -1.308448 |
| 32            | 1             | 0           | -1.154400               | -0.007663 | 1.477344  |
| 33            | 6             | 0           | -1.256652               | 2.463985  | -1.309534 |
| 34            | 1             | 0           | -1.756786               | 2.260814  | -2.259949 |
| 35            | 1             | 0           | -1.947938               | 3.018999  | -0.667226 |
| 36            | 1             | 0           | -0.390680               | 3.097322  | -1.519706 |

B3LYP/6-31+G(d,p), CH<sub>2</sub>Cl<sub>2</sub> (CPCM-Bondi)

| Center Number | Atomic Number | Atomic Type | Coordinates (Angstroms) |           |           |
|---------------|---------------|-------------|-------------------------|-----------|-----------|
|               |               |             | X                       | Y         | Z         |
| 1             | 6             | 0           | -0.800728               | 1.172859  | -0.601695 |
| 2             | 7             | 0           | -0.030993               | 1.382968  | 0.634312  |
| 3             | 1             | 0           | -0.381127               | 2.217641  | 1.102221  |
| 4             | 6             | 0           | 1.432301                | 1.529084  | 0.446883  |
| 5             | 1             | 0           | 1.640809                | 2.238054  | -0.368964 |
| 6             | 6             | 0           | 2.035374                | 2.110278  | 1.733607  |
| 7             | 1             | 0           | 3.115390                | 2.237217  | 1.618787  |
| 8             | 1             | 0           | 1.598424                | 3.090622  | 1.955026  |
| 9             | 1             | 0           | 1.853773                | 1.447496  | 2.585979  |
| 10            | 6             | 0           | 2.078061                | 0.201082  | 0.068516  |
| 11            | 6             | 0           | 2.908469                | 0.119513  | -1.057968 |
| 12            | 6             | 0           | 1.896574                | -0.949630 | 0.852961  |
| 13            | 6             | 0           | 3.548814                | -1.079180 | -1.394749 |
| 14            | 1             | 0           | 3.056773                | 1.001107  | -1.677136 |
| 15            | 6             | 0           | 2.530860                | -2.149140 | 0.519160  |
| 16            | 1             | 0           | 1.258705                | -0.906741 | 1.731184  |
| 17            | 6             | 0           | 3.360475                | -2.218160 | -0.607024 |
| 18            | 1             | 0           | 4.188142                | -1.121767 | -2.272017 |
| 19            | 1             | 0           | 2.380675                | -3.029280 | 1.138296  |
| 20            | 1             | 0           | 3.853367                | -3.150722 | -0.866147 |
| 21            | 6             | 0           | -1.957931               | 0.220206  | -0.317943 |
| 22            | 6             | 0           | -2.974548               | -0.124468 | -1.208817 |
| 23            | 6             | 0           | -3.952820               | -1.034861 | -0.811472 |
| 24            | 1             | 0           | -2.995275               | 0.310731  | -2.200125 |
| 25            | 6             | 0           | -2.894285               | -1.235642 | 1.325221  |
| 26            | 6             | 0           | -3.918451               | -1.599143 | 0.471232  |
| 27            | 1             | 0           | -4.744606               | -1.308407 | -1.501021 |
| 28            | 1             | 0           | -2.777234               | -1.614838 | 2.332271  |
| 29            | 1             | 0           | -4.669643               | -2.306394 | 0.800263  |
| 30            | 7             | 0           | -1.967088               | -0.352468 | 0.900745  |
| 31            | 1             | 0           | -0.150584               | 0.644439  | -1.310054 |
| 32            | 1             | 0           | -1.177251               | -0.052150 | 1.491349  |
| 33            | 6             | 0           | -1.276605               | 2.480208  | -1.258495 |
| 34            | 1             | 0           | -1.781984               | 2.296868  | -2.210348 |
| 35            | 1             | 0           | -1.964329               | 3.016121  | -0.595877 |
| 36            | 1             | 0           | -0.410820               | 3.118466  | -1.455584 |

Cartesian coordinates of the (*S,S*)-**1** species

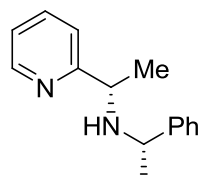

(*S,S*)-**1**

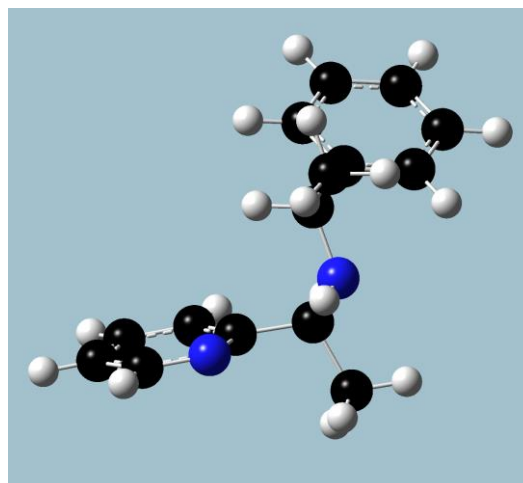

B3LYP/6-31+G(d), gas phase

| Center Number | Atomic Number | Atomic Type | Coordinates (Angstroms) |           |           |
|---------------|---------------|-------------|-------------------------|-----------|-----------|
|               |               |             | X                       | Y         | Z         |
| 1             | 6             | 0           | -0.730058               | -0.836778 | -0.996106 |
| 2             | 1             | 0           | -0.019919               | -0.140104 | -1.457430 |
| 3             | 7             | 0           | -0.004807               | -1.568479 | 0.048654  |
| 4             | 1             | 0           | -0.671484               | -2.174110 | 0.526597  |
| 5             | 6             | 0           | 0.680469                | -0.735860 | 1.048143  |
| 6             | 1             | 0           | 0.011373                | 0.046972  | 1.449348  |
| 7             | 6             | 0           | 1.099035                | -1.630604 | 2.227183  |
| 8             | 1             | 0           | 1.628434                | -1.045601 | 2.986570  |
| 9             | 1             | 0           | 0.218113                | -2.084562 | 2.699532  |
| 10            | 1             | 0           | 1.761861                | -2.432704 | 1.883538  |
| 11            | 6             | 0           | 1.891487                | -0.032134 | 0.443670  |
| 12            | 6             | 0           | 2.169746                | 1.302452  | 0.766617  |
| 13            | 6             | 0           | 2.775618                | -0.714415 | -0.405592 |
| 14            | 6             | 0           | 3.306932                | 1.942905  | 0.263348  |
| 15            | 1             | 0           | 1.487822                | 1.847908  | 1.417026  |
| 16            | 6             | 0           | 3.911358                | -0.078490 | -0.911966 |
| 17            | 1             | 0           | 2.555926                | -1.744153 | -0.673908 |
| 18            | 6             | 0           | 4.182585                | 1.253066  | -0.578597 |
| 19            | 1             | 0           | 3.503977                | 2.979958  | 0.524894  |
| 20            | 1             | 0           | 4.585788                | -0.622142 | -1.569665 |
| 21            | 1             | 0           | 5.066044                | 1.747997  | -0.974435 |
| 22            | 6             | 0           | -1.912881               | -0.023200 | -0.465068 |
| 23            | 6             | 0           | -2.112527               | 1.315003  | -0.829030 |
| 24            | 6             | 0           | -3.224642               | 1.997353  | -0.334096 |
| 25            | 1             | 0           | -1.401198               | 1.810722  | -1.485039 |
| 26            | 6             | 0           | -3.820594               | -0.009329 | 0.827629  |
| 27            | 6             | 0           | -4.103762               | 1.322575  | 0.513753  |
| 28            | 1             | 0           | -3.398270               | 3.037073  | -0.600928 |
| 29            | 1             | 0           | -4.477285               | -0.572244 | 1.489420  |
| 30            | 1             | 0           | -4.982071               | 1.810598  | 0.926590  |
| 31            | 7             | 0           | -2.757371               | -0.670982 | 0.356304  |
| 32            | 6             | 0           | -1.205940               | -1.830467 | -2.067242 |
| 33            | 1             | 0           | -1.910485               | -2.550157 | -1.633665 |
| 34            | 1             | 0           | -1.715434               | -1.312349 | -2.888187 |
| 35            | 1             | 0           | -0.348901               | -2.379341 | -2.470834 |

B3LYP/6-31+G(d), CH<sub>2</sub>Cl<sub>2</sub> (PCM-UFF)

| Center Number | Atomic Number | Atomic Type | Coordinates (Angstroms) |           |           |
|---------------|---------------|-------------|-------------------------|-----------|-----------|
|               |               |             | X                       | Y         | Z         |
| 1             | 6             | 0           | -0.733000               | -0.839993 | -1.006438 |
| 2             | 1             | 0           | -0.024313               | -0.139301 | -1.462718 |
| 3             | 7             | 0           | -0.002423               | -1.584272 | 0.029756  |
| 4             | 1             | 0           | -0.670725               | -2.188356 | 0.508236  |
| 5             | 6             | 0           | 0.681534                | -0.756260 | 1.038139  |
| 6             | 1             | 0           | 0.007693                | 0.019540  | 1.442256  |
| 7             | 6             | 0           | 1.101214                | -1.656803 | 2.212208  |
| 8             | 1             | 0           | 1.616069                | -1.071091 | 2.981018  |
| 9             | 1             | 0           | 0.222288                | -2.125057 | 2.673570  |
| 10            | 1             | 0           | 1.776979                | -2.448892 | 1.869751  |
| 11            | 6             | 0           | 1.889379                | -0.039734 | 0.442003  |
| 12            | 6             | 0           | 2.131139                | 1.308145  | 0.741257  |
| 13            | 6             | 0           | 2.807777                | -0.719079 | -0.373637 |
| 14            | 6             | 0           | 3.263987                | 1.964439  | 0.246194  |
| 15            | 1             | 0           | 1.424638                | 1.851961  | 1.365813  |
| 16            | 6             | 0           | 3.939632                | -0.068346 | -0.871918 |
| 17            | 1             | 0           | 2.623686                | -1.760352 | -0.623339 |
| 18            | 6             | 0           | 4.173085                | 1.277222  | -0.563159 |
| 19            | 1             | 0           | 3.431120                | 3.011254  | 0.488479  |
| 20            | 1             | 0           | 4.639750                | -0.610718 | -1.503145 |
| 21            | 1             | 0           | 5.052579                | 1.784058  | -0.952469 |
| 22            | 6             | 0           | -1.911512               | -0.026988 | -0.464289 |
| 23            | 6             | 0           | -2.096248               | 1.318136  | -0.809638 |
| 24            | 6             | 0           | -3.202549               | 2.006172  | -0.308142 |
| 25            | 1             | 0           | -1.379656               | 1.815803  | -1.457906 |
| 26            | 6             | 0           | -3.825971               | -0.010315 | 0.822980  |
| 27            | 6             | 0           | -4.091831               | 1.329240  | 0.527964  |
| 28            | 1             | 0           | -3.363625               | 3.050965  | -0.560975 |
| 29            | 1             | 0           | -4.492646               | -0.573295 | 1.474106  |
| 30            | 1             | 0           | -4.965401               | 1.820884  | 0.945652  |
| 31            | 7             | 0           | -2.767309               | -0.678581 | 0.344224  |
| 32            | 6             | 0           | -1.212331               | -1.819243 | -2.089077 |
| 33            | 1             | 0           | -1.904886               | -2.554934 | -1.662568 |
| 34            | 1             | 0           | -1.734717               | -1.289606 | -2.894028 |
| 35            | 1             | 0           | -0.356529               | -2.352452 | -2.516268 |

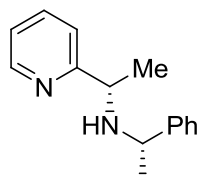

(S,S)-1

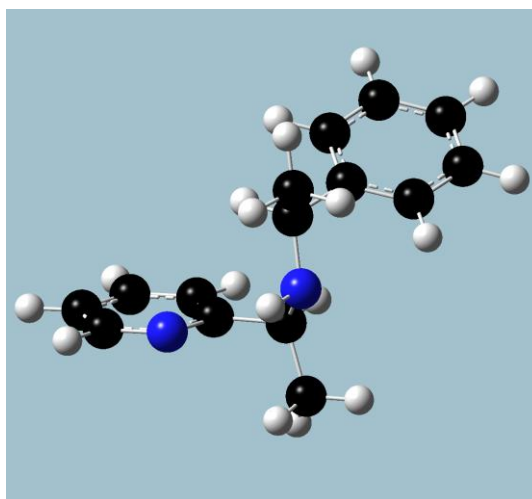

B3LYP/6-31+G(d,p), CH<sub>2</sub>Cl<sub>2</sub> (PCM-UFF)

| Center Number | Atomic Number | Atomic Type | Coordinates (Angstroms) |           |           |
|---------------|---------------|-------------|-------------------------|-----------|-----------|
|               |               |             | X                       | Y         | Z         |
| 1             | 6             | 0           | -0.733231               | -0.843291 | -1.004312 |
| 2             | 1             | 0           | -0.026197               | -0.143112 | -1.463073 |
| 3             | 7             | 0           | -0.002608               | -1.584021 | 0.033491  |
| 4             | 1             | 0           | -0.667719               | -2.189798 | 0.511313  |
| 5             | 6             | 0           | 0.681490                | -0.755236 | 1.040241  |
| 6             | 1             | 0           | 0.009776                | 0.022199  | 1.443230  |
| 7             | 6             | 0           | 1.101160                | -1.653906 | 2.215366  |
| 8             | 1             | 0           | 1.614925                | -1.067686 | 2.982832  |
| 9             | 1             | 0           | 0.223018                | -2.121659 | 2.675771  |
| 10            | 1             | 0           | 1.776804                | -2.444895 | 1.873424  |
| 11            | 6             | 0           | 1.888799                | -0.039252 | 0.442365  |
| 12            | 6             | 0           | 2.134511                | 1.306889  | 0.745661  |
| 13            | 6             | 0           | 2.802292                | -0.717939 | -0.379063 |
| 14            | 6             | 0           | 3.266848                | 1.962065  | 0.248631  |
| 15            | 1             | 0           | 1.431900                | 1.849416  | 1.374295  |
| 16            | 6             | 0           | 3.933392                | -0.067935 | -0.879416 |
| 17            | 1             | 0           | 2.613848                | -1.757049 | -0.631316 |
| 18            | 6             | 0           | 4.171031                | 1.275737  | -0.566645 |
| 19            | 1             | 0           | 3.437426                | 3.006792  | 0.493720  |
| 20            | 1             | 0           | 4.629318                | -0.608998 | -1.514942 |
| 21            | 1             | 0           | 5.049395                | 1.781661  | -0.957310 |
| 22            | 6             | 0           | -1.910816               | -0.027886 | -0.463941 |
| 23            | 6             | 0           | -2.093957               | 1.316424  | -0.813062 |
| 24            | 6             | 0           | -3.199268               | 2.006786  | -0.313450 |
| 25            | 1             | 0           | -1.377166               | 1.810689  | -1.462309 |
| 26            | 6             | 0           | -3.825138               | -0.005617 | 0.823434  |
| 27            | 6             | 0           | -4.089061               | 1.333213  | 0.524530  |
| 28            | 1             | 0           | -3.359259               | 3.050285  | -0.568893 |
| 29            | 1             | 0           | -4.492869               | -0.564595 | 1.475945  |
| 30            | 1             | 0           | -4.961354               | 1.826621  | 0.940626  |
| 31            | 7             | 0           | -2.767076               | -0.676432 | 0.346289  |
| 32            | 6             | 0           | -1.213598               | -1.825191 | -2.083716 |
| 33            | 1             | 0           | -1.905302               | -2.557970 | -1.653616 |
| 34            | 1             | 0           | -1.736244               | -1.298321 | -2.888635 |
| 35            | 1             | 0           | -0.359243               | -2.359572 | -2.509264 |

B3LYP/6-31+G(d,p), CH<sub>2</sub>Cl<sub>2</sub> (CPCM-Bondi)

| Center Number | Atomic Number | Atomic Type | Coordinates (Angstroms) |           |           |
|---------------|---------------|-------------|-------------------------|-----------|-----------|
|               |               |             | X                       | Y         | Z         |
| 1             | 6             | 0           | -0.734849               | -0.838478 | -1.018594 |
| 2             | 1             | 0           | -0.030728               | -0.130317 | -1.468436 |
| 3             | 7             | 0           | 0.001924                | -1.597029 | 0.004727  |
| 4             | 1             | 0           | -0.658622               | -2.213679 | 0.475612  |
| 5             | 6             | 0           | 0.685135                | -0.782148 | 1.027375  |
| 6             | 1             | 0           | 0.009161                | -0.015255 | 1.440186  |
| 7             | 6             | 0           | 1.105629                | -1.699007 | 2.187630  |
| 8             | 1             | 0           | 1.612710                | -1.121999 | 2.966582  |
| 9             | 1             | 0           | 0.227184                | -2.178910 | 2.634587  |
| 10            | 1             | 0           | 1.787469                | -2.480647 | 1.835806  |
| 11            | 6             | 0           | 1.888651                | -0.049205 | 0.442087  |
| 12            | 6             | 0           | 2.095476                | 1.307908  | 0.727191  |
| 13            | 6             | 0           | 2.836511                | -0.718216 | -0.349063 |
| 14            | 6             | 0           | 3.220933                | 1.983679  | 0.240548  |
| 15            | 1             | 0           | 1.367754                | 1.842517  | 1.333407  |
| 16            | 6             | 0           | 3.960523                | -0.047751 | -0.839736 |
| 17            | 1             | 0           | 2.688142                | -1.767780 | -0.585437 |
| 18            | 6             | 0           | 4.157904                | 1.307273  | -0.546283 |
| 19            | 1             | 0           | 3.360336                | 3.036239  | 0.471597  |
| 20            | 1             | 0           | 4.682435                | -0.582110 | -1.451502 |
| 21            | 1             | 0           | 5.030655                | 1.828796  | -0.929040 |
| 22            | 6             | 0           | -1.908618               | -0.028311 | -0.462342 |
| 23            | 6             | 0           | -2.082961               | 1.322569  | -0.790393 |
| 24            | 6             | 0           | -3.184198               | 2.012830  | -0.281333 |
| 25            | 1             | 0           | -1.362071               | 1.821428  | -1.431216 |
| 26            | 6             | 0           | -3.827546               | -0.011891 | 0.823896  |
| 27            | 6             | 0           | -4.080493               | 1.333038  | 0.545436  |
| 28            | 1             | 0           | -3.336270               | 3.061238  | -0.521026 |
| 29            | 1             | 0           | -4.500318               | -0.575961 | 1.466440  |
| 30            | 1             | 0           | -4.949684               | 1.826164  | 0.968276  |
| 31            | 7             | 0           | -2.772245               | -0.682962 | 0.336562  |
| 32            | 6             | 0           | -1.218690               | -1.802015 | -2.113251 |
| 33            | 1             | 0           | -1.899750               | -2.550566 | -1.693046 |
| 34            | 1             | 0           | -1.752078               | -1.260630 | -2.901152 |
| 35            | 1             | 0           | -0.364525               | -2.320228 | -2.559671 |

Cartesian coordinates of the ammonium-(*S,S*)-1 species

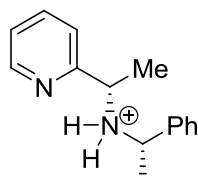

(*S,S*)-Ammonium 1

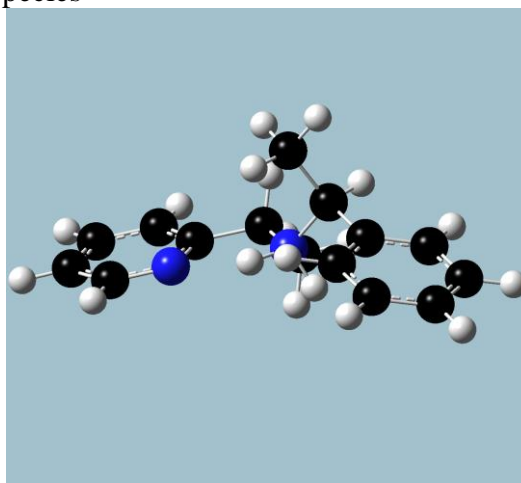

B3LYP/6-31+G(d), gas phase

| Center Number | Atomic Number | Atomic Type | Coordinates (Angstroms) |           |           |
|---------------|---------------|-------------|-------------------------|-----------|-----------|
|               |               |             | X                       | Y         | Z         |
| 1             | 6             | 0           | -1.263365               | 1.401803  | -0.092713 |
| 2             | 1             | 0           | -1.198570               | 1.903688  | 0.877179  |
| 3             | 7             | 0           | 0.052278                | 0.671772  | -0.300169 |
| 4             | 1             | 0           | -0.236525               | -0.290452 | -0.595956 |
| 5             | 6             | 0           | 1.025216                | 0.591898  | 0.891263  |
| 6             | 1             | 0           | 1.138087                | 1.630731  | 1.218425  |
| 7             | 6             | 0           | 0.413205                | -0.240277 | 2.017356  |
| 8             | 1             | 0           | 1.109962                | -0.245479 | 2.860428  |
| 9             | 1             | 0           | -0.535816               | 0.175857  | 2.370590  |
| 10            | 1             | 0           | 0.244062                | -1.277771 | 1.715046  |
| 11            | 6             | 0           | 2.358111                | 0.093395  | 0.368772  |
| 12            | 6             | 0           | 3.439363                | 0.982502  | 0.281139  |
| 13            | 6             | 0           | 2.531997                | -1.237634 | -0.044957 |
| 14            | 6             | 0           | 4.675355                | 0.550587  | -0.207007 |
| 15            | 1             | 0           | 3.323002                | 2.013488  | 0.609762  |
| 16            | 6             | 0           | 3.764575                | -1.666121 | -0.540531 |
| 17            | 1             | 0           | 1.715123                | -1.952632 | 0.026410  |
| 18            | 6             | 0           | 4.837938                | -0.773257 | -0.621071 |
| 19            | 1             | 0           | 5.507617                | 1.246466  | -0.259949 |
| 20            | 1             | 0           | 3.889030                | -2.698047 | -0.855894 |
| 21            | 1             | 0           | 5.798138                | -1.110994 | -1.000204 |
| 22            | 6             | 0           | -2.375603               | 0.351013  | -0.071270 |
| 23            | 6             | 0           | -3.663071               | 0.656517  | 0.374727  |
| 24            | 6             | 0           | -4.634902               | -0.343705 | 0.317582  |
| 25            | 1             | 0           | -3.902791               | 1.644072  | -0.759536 |
| 26            | 6             | 0           | -2.974784               | -1.816360 | -0.592846 |
| 27            | 6             | 0           | -4.288592               | -1.602796 | -0.178830 |
| 28            | 1             | 0           | -5.646579               | -0.143267 | 0.658108  |
| 29            | 1             | 0           | -2.653554               | -2.780036 | -0.978754 |
| 30            | 1             | 0           | -5.017460               | -2.404546 | -0.239132 |
| 31            | 7             | 0           | -2.037400               | -0.856960 | -0.538031 |
| 32            | 1             | 0           | 0.562391                | 1.084389  | -1.086808 |
| 33            | 6             | 0           | -1.455081               | 2.446018  | -1.199806 |
| 34            | 1             | 0           | -1.496784               | 1.971803  | -2.186989 |
| 35            | 1             | 0           | -2.397528               | 2.979453  | -1.047528 |
| 36            | 1             | 0           | -0.648127               | 3.188092  | -1.187718 |

B3LYP/6-31+G(d), CH<sub>2</sub>Cl<sub>2</sub> (PCM-UFF)

| Center Number | Atomic Number | Atomic Type | Coordinates (Angstroms) |           |           |
|---------------|---------------|-------------|-------------------------|-----------|-----------|
|               |               |             | X                       | Y         | Z         |
| 1             | 6             | 0           | -1.262455               | 1.252687  | 0.060323  |
| 2             | 1             | 0           | -1.228450               | 1.630856  | 1.085784  |
| 3             | 7             | 0           | 0.007151                | 0.443025  | -0.138076 |
| 4             | 1             | 0           | -0.314322               | -0.549780 | -0.180630 |
| 5             | 6             | 0           | 1.120322                | 0.628448  | 0.901107  |
| 6             | 1             | 0           | 1.200957                | 1.711181  | 1.030228  |
| 7             | 6             | 0           | 0.715016                | -0.023052 | 2.223300  |
| 8             | 1             | 0           | 1.508863                | 0.152988  | 2.954534  |
| 9             | 1             | 0           | -0.209068               | 0.402759  | 2.626023  |
| 10            | 1             | 0           | 0.581391                | -1.104203 | 2.121364  |
| 11            | 6             | 0           | 2.422281                | 0.110355  | 0.315667  |
| 12            | 6             | 0           | 3.413950                | 1.025060  | -0.067241 |
| 13            | 6             | 0           | 2.660269                | -1.263142 | 0.145399  |
| 14            | 6             | 0           | 4.623973                | 0.579117  | -0.606677 |
| 15            | 1             | 0           | 3.243872                | 2.091245  | 0.063737  |
| 16            | 6             | 0           | 3.865902                | -1.708783 | -0.401084 |
| 17            | 1             | 0           | 1.914180                | -1.995732 | 0.442131  |
| 18            | 6             | 0           | 4.850745                | -0.789197 | -0.776831 |
| 19            | 1             | 0           | 5.385342                | 1.299790  | -0.891776 |
| 20            | 1             | 0           | 4.037294                | -2.774152 | -0.527567 |
| 21            | 1             | 0           | 5.790121                | -1.138644 | -1.196399 |
| 22            | 6             | 0           | -2.453528               | 0.299233  | -0.073022 |
| 23            | 6             | 0           | -3.770066               | 0.760715  | 0.026045  |
| 24            | 6             | 0           | -4.805891               | -0.166241 | -0.086043 |
| 25            | 1             | 0           | -3.984318               | 1.811368  | 0.193253  |
| 26            | 6             | 0           | -3.156566               | -1.881309 | -0.370844 |
| 27            | 6             | 0           | -4.498018               | -1.513829 | -0.292035 |
| 28            | 1             | 0           | -5.839303               | 0.159444  | -0.012415 |
| 29            | 1             | 0           | -2.863434               | -2.916379 | -0.524782 |
| 30            | 1             | 0           | -5.277248               | -2.263133 | -0.386120 |
| 31            | 7             | 0           | -2.156463               | -0.992291 | -0.261276 |
| 32            | 1             | 0           | 0.394984                | 0.648103  | -1.064539 |
| 33            | 6             | 0           | -1.290079               | 2.434325  | -0.912469 |
| 34            | 1             | 0           | -1.332083               | 2.092492  | -1.952652 |
| 35            | 1             | 0           | -2.171019               | 3.052035  | -0.721531 |
| 36            | 1             | 0           | -0.407707               | 3.068308  | -0.776763 |

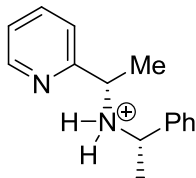

(S,S)-Ammonium 1

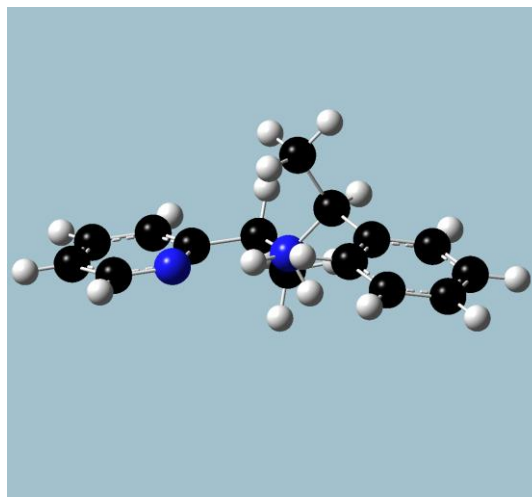

B3LYP/6-31+G(d,p), CH<sub>2</sub>Cl<sub>2</sub> (PCM-UFF)

| Center Number | Atomic Number | Atomic Type | Coordinates (Angstroms) |           |           |
|---------------|---------------|-------------|-------------------------|-----------|-----------|
|               |               |             | X                       | Y         | Z         |
| 1             | 6             | 0           | -1.263520               | 1.260068  | 0.062259  |
| 2             | 1             | 0           | -1.232902               | 1.635413  | 1.088638  |
| 3             | 7             | 0           | 0.002881                | 0.447941  | -0.135975 |
| 4             | 1             | 0           | -0.331768               | -0.542671 | -0.173756 |
| 5             | 6             | 0           | 1.116849                | 0.632899  | 0.900579  |
| 6             | 1             | 0           | 1.201925                | 1.714979  | 1.028674  |
| 7             | 6             | 0           | 0.713267                | -0.015731 | 2.224442  |
| 8             | 1             | 0           | 1.506416                | 0.163000  | 2.954015  |
| 9             | 1             | 0           | -0.210246               | 0.409649  | 2.626040  |
| 10            | 1             | 0           | 0.581440                | -1.096266 | 2.124305  |
| 11            | 6             | 0           | 2.417436                | 0.111841  | 0.314635  |
| 12            | 6             | 0           | 3.410905                | 1.023818  | -0.069437 |
| 13            | 6             | 0           | 2.651567                | -1.262261 | 0.145117  |
| 14            | 6             | 0           | 4.619135                | 0.574320  | -0.609446 |
| 15            | 1             | 0           | 3.243552                | 2.089727  | 0.060889  |
| 16            | 6             | 0           | 3.855405                | -1.711202 | -0.402033 |
| 17            | 1             | 0           | 1.903978                | -1.991963 | 0.442408  |
| 18            | 6             | 0           | 4.842192                | -0.794463 | -0.778847 |
| 19            | 1             | 0           | 5.381680                | 1.292188  | -0.895456 |
| 20            | 1             | 0           | 4.023975                | -2.776259 | -0.528148 |
| 21            | 1             | 0           | 5.779655                | -1.146281 | -1.198653 |
| 22            | 6             | 0           | -2.451331               | 0.303107  | -0.072945 |
| 23            | 6             | 0           | -3.771303               | 0.756246  | 0.014219  |
| 24            | 6             | 0           | -4.799243               | -0.179044 | -0.098207 |
| 25            | 1             | 0           | -3.993517               | 1.805862  | 0.172182  |
| 26            | 6             | 0           | -3.136781               | -1.885316 | -0.359961 |
| 27            | 6             | 0           | -4.480678               | -1.525788 | -0.292455 |
| 28            | 1             | 0           | -5.834807               | 0.139227  | -0.033903 |
| 29            | 1             | 0           | -2.836648               | -2.919062 | -0.504663 |
| 30            | 1             | 0           | -5.253645               | -2.280434 | -0.386230 |
| 31            | 7             | 0           | -2.144190               | -0.987638 | -0.250099 |
| 32            | 1             | 0           | 0.389436                | 0.650074  | -1.062169 |
| 33            | 6             | 0           | -1.292328               | 2.443353  | -0.907644 |
| 34            | 1             | 0           | -1.328982               | 2.103426  | -1.947603 |
| 35            | 1             | 0           | -2.175753               | 3.056248  | -0.718840 |
| 36            | 1             | 0           | -0.414064               | 3.079945  | -0.766872 |

B3LYP/6-31+G(d,p), CH<sub>2</sub>Cl<sub>2</sub> (CPCM-Bondi)

| Center Number | Atomic Number | Atomic Type | Coordinates (Angstroms) |           |           |
|---------------|---------------|-------------|-------------------------|-----------|-----------|
|               |               |             | X                       | Y         | Z         |
| 1             | 6             | 0           | -1.248620               | 1.231445  | 0.017745  |
| 2             | 1             | 0           | -1.205961               | 1.637576  | 1.031318  |
| 3             | 7             | 0           | 0.009718                | 0.408889  | -0.170987 |
| 4             | 1             | 0           | -0.308056               | -0.580470 | -0.199772 |
| 5             | 6             | 0           | 1.111675                | 0.612705  | 0.868753  |
| 6             | 1             | 0           | 1.179601                | 1.695896  | 0.993111  |
| 7             | 6             | 0           | 0.707810                | -0.040278 | 2.190673  |
| 8             | 1             | 0           | 1.486459                | 0.159952  | 2.930666  |
| 9             | 1             | 0           | -0.232714               | 0.365875  | 2.573145  |
| 10            | 1             | 0           | 0.602752                | -1.123599 | 2.085285  |
| 11            | 6             | 0           | 2.427183                | 0.106894  | 0.303033  |
| 12            | 6             | 0           | 3.448221                | 1.023022  | 0.012093  |
| 13            | 6             | 0           | 2.652576                | -1.259873 | 0.070833  |
| 14            | 6             | 0           | 4.675586                | 0.584657  | -0.495343 |
| 15            | 1             | 0           | 3.285623                | 2.082998  | 0.188663  |
| 16            | 6             | 0           | 3.875118                | -1.697741 | -0.444589 |
| 17            | 1             | 0           | 1.877811                | -1.989047 | 0.291021  |
| 18            | 6             | 0           | 4.890631                | -0.777047 | -0.726370 |
| 19            | 1             | 0           | 5.458649                | 1.305788  | -0.709910 |
| 20            | 1             | 0           | 4.035681                | -2.757138 | -0.621240 |
| 21            | 1             | 0           | 5.842226                | -1.119854 | -1.121692 |
| 22            | 6             | 0           | -2.455047               | 0.297082  | -0.079713 |
| 23            | 6             | 0           | -3.758002               | 0.785870  | 0.070645  |
| 24            | 6             | 0           | -4.819144               | -0.114308 | -0.011820 |
| 25            | 1             | 0           | -3.938394               | 1.839379  | 0.254872  |
| 26            | 6             | 0           | -3.221949               | -1.863874 | -0.370636 |
| 27            | 6             | 0           | -4.550697               | -1.467006 | -0.240886 |
| 28            | 1             | 0           | -5.840644               | 0.234444  | 0.103041  |
| 29            | 1             | 0           | -2.962289               | -2.904648 | -0.543268 |
| 30            | 1             | 0           | -5.348985               | -2.197608 | -0.312674 |
| 31            | 7             | 0           | -2.194922               | -1.000070 | -0.289803 |
| 32            | 1             | 0           | 0.398168                | 0.603052  | -1.098086 |
| 33            | 6             | 0           | -1.269239               | 2.386937  | -0.986025 |
| 34            | 1             | 0           | -1.317026               | 2.011317  | -2.013150 |
| 35            | 1             | 0           | -2.140423               | 3.020347  | -0.807176 |
| 36            | 1             | 0           | -0.372652               | 3.003113  | -0.868991 |

Cartesian coordinates of the pyridinium-(*S,S*)-1 species

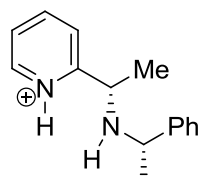

(*S,S*)-Pyridinium 1

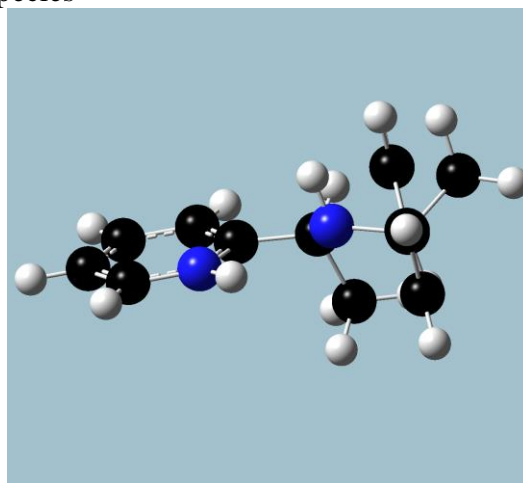

B3LYP/6-31+G(d), gas phase

| Center Number | Atomic Number | Atomic Type | Coordinates (Angstroms) |           |           |
|---------------|---------------|-------------|-------------------------|-----------|-----------|
|               |               |             | X                       | Y         | Z         |
| 1             | 6             | 0           | 1.330599                | 1.307438  | -0.087386 |
| 2             | 1             | 0           | 1.533350                | 2.028394  | -0.894556 |
| 3             | 7             | 0           | 0.044268                | 0.608623  | -0.245657 |
| 4             | 1             | 0           | -0.061982               | 0.335747  | -1.224767 |
| 5             | 6             | 0           | -1.221011               | 1.296237  | 0.159292  |
| 6             | 1             | 0           | -1.102534               | 1.562131  | 1.213423  |
| 7             | 6             | 0           | -1.498379               | 2.575695  | -0.646502 |
| 8             | 1             | 0           | -2.434908               | 3.036089  | -0.315416 |
| 9             | 1             | 0           | -0.699764               | 3.315891  | -0.519435 |
| 10            | 1             | 0           | -1.592352               | 2.366814  | -1.718382 |
| 11            | 6             | 0           | -2.346327               | 0.272965  | 0.075117  |
| 12            | 6             | 0           | -2.859813               | -0.299030 | 1.247275  |
| 13            | 6             | 0           | -2.875372               | -0.135962 | -1.158788 |
| 14            | 6             | 0           | -3.875964               | -1.256844 | 1.192573  |
| 15            | 1             | 0           | -2.470127               | 0.014323  | 2.214046  |
| 16            | 6             | 0           | -3.886438               | -1.098746 | -1.218193 |
| 17            | 1             | 0           | -2.516465               | 0.304877  | -2.086579 |
| 18            | 6             | 0           | -4.389578               | -1.661715 | -0.042091 |
| 19            | 1             | 0           | -4.269364               | -1.680247 | 2.112807  |
| 20            | 1             | 0           | -4.288729               | -1.399135 | -2.181933 |
| 21            | 1             | 0           | -5.182885               | -2.402599 | -0.087720 |
| 22            | 6             | 0           | 2.418638                | 0.238424  | -0.147311 |
| 23            | 6             | 0           | 3.767465                | 0.445451  | -0.428848 |
| 24            | 6             | 0           | 4.650287                | -0.633960 | -0.380850 |
| 25            | 1             | 0           | 4.114857                | 1.441877  | -0.682767 |
| 26            | 6             | 0           | 2.838071                | -2.086355 | 0.209858  |
| 27            | 6             | 0           | 4.185326                | -1.916596 | -0.053458 |
| 28            | 1             | 0           | 5.702739                | -0.481125 | -0.601533 |
| 29            | 1             | 0           | 2.381756                | -3.037961 | 0.458259  |
| 30            | 1             | 0           | 4.855376                | -2.768044 | -0.012841 |
| 31            | 7             | 0           | 2.017792                | -1.015290 | 0.151788  |
| 32            | 1             | 0           | 0.992258                | -1.066945 | 0.303248  |
| 33            | 6             | 0           | 1.452327                | 2.047230  | 1.261101  |
| 34            | 1             | 0           | 0.763450                | 2.894040  | 1.304016  |
| 35            | 1             | 0           | 1.236400                | 1.376181  | 2.099541  |
| 36            | 1             | 0           | 2.465512                | 2.440970  | 1.386958  |

B3LYP/6-31+G(d), CH<sub>2</sub>Cl<sub>2</sub> (PCM-UFF)

| Center Number | Atomic Number | Atomic Type | Coordinates (Angstroms) |           |           |
|---------------|---------------|-------------|-------------------------|-----------|-----------|
|               |               |             | X                       | Y         | Z         |
| 1             | 6             | 0           | 1.312378                | 1.254777  | -0.058325 |
| 2             | 1             | 0           | 1.488779                | 1.971879  | -0.873699 |
| 3             | 7             | 0           | 0.038837                | 0.527578  | -0.199492 |
| 4             | 1             | 0           | -0.027384               | 0.179931  | -1.157697 |
| 5             | 6             | 0           | -1.221022               | 1.256479  | 0.107298  |
| 6             | 1             | 0           | -1.141536               | 1.593193  | 1.144386  |
| 7             | 6             | 0           | -1.457142               | 2.486559  | -0.788845 |
| 8             | 1             | 0           | -2.396212               | 2.980447  | -0.515927 |
| 9             | 1             | 0           | -0.650098               | 3.219991  | -0.680788 |
| 10            | 1             | 0           | -1.517826               | 2.207312  | -1.847267 |
| 11            | 6             | 0           | -2.373318               | 0.260571  | 0.047339  |
| 12            | 6             | 0           | -3.012351               | -0.148082 | 1.226485  |
| 13            | 6             | 0           | -2.815763               | -0.274765 | -1.172834 |
| 14            | 6             | 0           | -4.065658               | -1.067678 | 1.192807  |
| 15            | 1             | 0           | -2.685801               | 0.259140  | 2.181150  |
| 16            | 6             | 0           | -3.863462               | -1.199388 | -1.211333 |
| 17            | 1             | 0           | -2.349138               | 0.030789  | -2.106712 |
| 18            | 6             | 0           | -4.493239               | -1.598321 | -0.027707 |
| 19            | 1             | 0           | -4.550750               | -1.366859 | 2.118478  |
| 20            | 1             | 0           | -4.191302               | -1.602824 | -2.166050 |
| 21            | 1             | 0           | -5.312023               | -2.312419 | -0.057813 |
| 22            | 6             | 0           | 2.430165                | 0.223798  | -0.120772 |
| 23            | 6             | 0           | 3.751298                | 0.483120  | -0.475737 |
| 24            | 6             | 0           | 4.689173                | -0.548260 | -0.425539 |
| 25            | 1             | 0           | 4.035031                | 1.483052  | -0.786296 |
| 26            | 6             | 0           | 2.982298                | -2.058778 | 0.309919  |
| 27            | 6             | 0           | 4.305228                | -1.835087 | -0.024485 |
| 28            | 1             | 0           | 5.720513                | -0.353561 | -0.702298 |
| 29            | 1             | 0           | 2.585604                | -3.018082 | 0.618754  |
| 30            | 1             | 0           | 5.016987                | -2.650919 | 0.019475  |
| 31            | 7             | 0           | 2.106631                | -1.033434 | 0.248938  |
| 32            | 1             | 0           | 1.107049                | -1.158747 | 0.460767  |
| 33            | 6             | 0           | 1.415845                | 2.010249  | 1.282144  |
| 34            | 1             | 0           | 0.719238                | 2.851869  | 1.310749  |
| 35            | 1             | 0           | 1.199240                | 1.342671  | 2.123171  |
| 36            | 1             | 0           | 2.424765                | 2.412967  | 1.409018  |



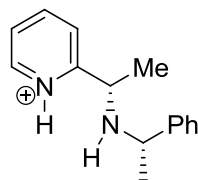

(S,S)-Pyridinium **1**

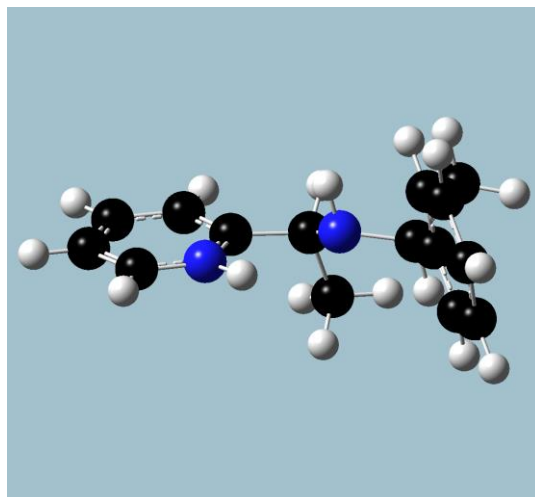

B3LYP/6-31+G(d,p), CH<sub>2</sub>Cl<sub>2</sub> (PCM-UFF)

| Center Number | Atomic Number | Atomic Type | Coordinates (Angstroms) |           |           |
|---------------|---------------|-------------|-------------------------|-----------|-----------|
|               |               |             | X                       | Y         | Z         |
| 1             | 6             | 0           | 1.313564                | 1.256442  | -0.059803 |
| 2             | 1             | 0           | 1.494329                | 1.973225  | -0.873795 |
| 3             | 7             | 0           | 0.039040                | 0.531997  | -0.203848 |
| 4             | 1             | 0           | -0.029127               | 0.188723  | -1.161978 |
| 5             | 6             | 0           | -1.220483               | 1.257854  | 0.110142  |
| 6             | 1             | 0           | -1.140316               | 1.589463  | 1.148376  |
| 7             | 6             | 0           | -1.460411               | 2.491910  | -0.779154 |
| 8             | 1             | 0           | -2.396743               | 2.984459  | -0.499363 |
| 9             | 1             | 0           | -0.653150               | 3.223476  | -0.672010 |
| 10            | 1             | 0           | -1.526545               | 2.217035  | -1.837299 |
| 11            | 6             | 0           | -2.371541               | 0.260838  | 0.049027  |
| 12            | 6             | 0           | -3.004167               | -0.157025 | 1.228220  |
| 13            | 6             | 0           | -2.818314               | -0.266797 | -1.172790 |
| 14            | 6             | 0           | -4.055805               | -1.078140 | 1.192747  |
| 15            | 1             | 0           | -2.674267               | 0.244173  | 2.183363  |
| 16            | 6             | 0           | -3.864267               | -1.192962 | -1.212840 |
| 17            | 1             | 0           | -2.356709               | 0.045846  | -2.105844 |
| 18            | 6             | 0           | -4.487794               | -1.601066 | -0.029293 |
| 19            | 1             | 0           | -4.535979               | -1.384419 | 2.117687  |
| 20            | 1             | 0           | -4.195555               | -1.590245 | -2.168007 |
| 21            | 1             | 0           | -5.304801               | -2.315875 | -0.060577 |
| 22            | 6             | 0           | 2.429244                | 0.223690  | -0.121720 |
| 23            | 6             | 0           | 3.751473                | 0.481954  | -0.473277 |
| 24            | 6             | 0           | 4.686802                | -0.551233 | -0.423616 |
| 25            | 1             | 0           | 4.037097                | 1.481494  | -0.780825 |
| 26            | 6             | 0           | 2.975714                | -2.059963 | 0.304919  |
| 27            | 6             | 0           | 4.299442                | -1.838043 | -0.026257 |
| 28            | 1             | 0           | 5.718513                | -0.358278 | -0.697694 |
| 29            | 1             | 0           | 2.577920                | -3.019237 | 0.610475  |
| 30            | 1             | 0           | 5.008911                | -2.654917 | 0.017166  |
| 31            | 7             | 0           | 2.102180                | -1.032993 | 0.244344  |
| 32            | 1             | 0           | 1.102316                | -1.154173 | 0.453818  |
| 33            | 6             | 0           | 1.416592                | 2.010779  | 1.281143  |
| 34            | 1             | 0           | 0.719935                | 2.850911  | 1.310353  |
| 35            | 1             | 0           | 1.200982                | 1.342412  | 2.120471  |
| 36            | 1             | 0           | 2.424341                | 2.413471  | 1.407527  |

B3LYP/6-31+G(d,p), CH<sub>2</sub>Cl<sub>2</sub> (CPCM-Bondi)

| Center Number | Atomic Number | Atomic Type | Coordinates (Angstroms) |           |           |
|---------------|---------------|-------------|-------------------------|-----------|-----------|
|               |               |             | X                       | Y         | Z         |
| 1             | 6             | 0           | 1.303662                | 1.230749  | -0.048174 |
| 2             | 1             | 0           | 1.481376                | 1.936585  | -0.872204 |
| 3             | 7             | 0           | 0.033421                | 0.496967  | -0.188084 |
| 4             | 1             | 0           | -0.005905               | 0.111494  | -1.132101 |
| 5             | 6             | 0           | -1.227661               | 1.249989  | 0.043518  |
| 6             | 1             | 0           | -1.173116               | 1.654831  | 1.056926  |
| 7             | 6             | 0           | -1.440715               | 2.418523  | -0.937295 |
| 8             | 1             | 0           | -2.382470               | 2.931319  | -0.716403 |
| 9             | 1             | 0           | -0.632569               | 3.153048  | -0.860533 |
| 10            | 1             | 0           | -1.480898               | 2.063415  | -1.972815 |
| 11            | 6             | 0           | -2.387463               | 0.260497  | 0.023534  |
| 12            | 6             | 0           | -3.099186               | -0.012848 | 1.200723  |
| 13            | 6             | 0           | -2.768209               | -0.400216 | -1.156508 |
| 14            | 6             | 0           | -4.163769               | -0.921001 | 1.204869  |
| 15            | 1             | 0           | -2.819565               | 0.490161  | 2.123216  |
| 16            | 6             | 0           | -3.826885               | -1.313484 | -1.155742 |
| 17            | 1             | 0           | -2.242259               | -0.204385 | -2.087562 |
| 18            | 6             | 0           | -4.529713               | -1.576604 | 0.025561  |
| 19            | 1             | 0           | -4.703662               | -1.114817 | 2.127449  |
| 20            | 1             | 0           | -4.105656               | -1.815262 | -2.078114 |
| 21            | 1             | 0           | -5.355212               | -2.282462 | 0.024803  |
| 22            | 6             | 0           | 2.433724                | 0.215770  | -0.095298 |
| 23            | 6             | 0           | 3.750512                | 0.507701  | -0.443297 |
| 24            | 6             | 0           | 4.712952                | -0.499696 | -0.393345 |
| 25            | 1             | 0           | 4.006800                | 1.515776  | -0.748319 |
| 26            | 6             | 0           | 3.039368                | -2.053321 | 0.328065  |
| 27            | 6             | 0           | 4.357558                | -1.797493 | -0.000698 |
| 28            | 1             | 0           | 5.739982                | -0.278788 | -0.664500 |
| 29            | 1             | 0           | 2.663321                | -3.021901 | 0.631357  |
| 30            | 1             | 0           | 5.087583                | -2.596236 | 0.041508  |
| 31            | 7             | 0           | 2.139503                | -1.048594 | 0.269972  |
| 32            | 1             | 0           | 1.150149                | -1.209854 | 0.487173  |
| 33            | 6             | 0           | 1.394413                | 2.009806  | 1.279138  |
| 34            | 1             | 0           | 0.688805                | 2.843263  | 1.290048  |
| 35            | 1             | 0           | 1.182025                | 1.352210  | 2.128186  |
| 36            | 1             | 0           | 2.399267                | 2.422767  | 1.398354  |

Cartesian coordinates of the TS for the proton transfer of the protonated (*R,S*)-1 species

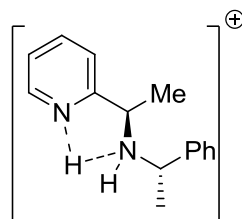

(*R,S*)-TS-1

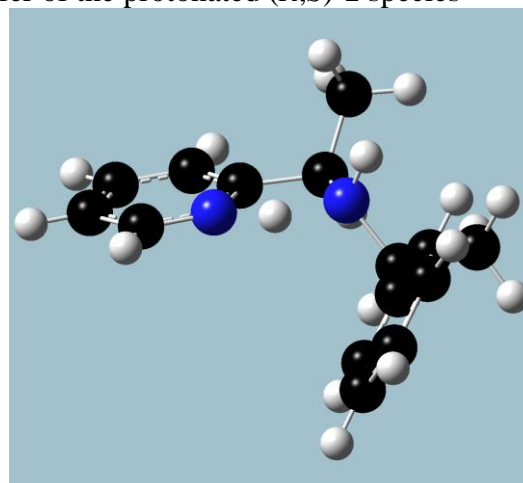

B3LYP/6-31+G(d), gas phase

| Center Number | Atomic Number | Atomic Type | Coordinates (Angstroms) |           |           |
|---------------|---------------|-------------|-------------------------|-----------|-----------|
|               |               |             | X                       | Y         | Z         |
| 1             | 6             | 0           | 1.454646                | 1.455985  | 0.045342  |
| 2             | 7             | 0           | 0.099891                | 0.933793  | -0.294940 |
| 3             | 1             | 0           | -0.228624               | 1.321569  | -1.180150 |
| 4             | 6             | 0           | -0.983737               | 1.051971  | 0.747566  |
| 5             | 1             | 0           | -0.545607               | 0.629856  | 1.659627  |
| 6             | 6             | 0           | -1.370010               | 2.512693  | 1.008967  |
| 7             | 1             | 0           | -2.135155               | 2.557294  | 1.789991  |
| 8             | 1             | 0           | -0.512636               | 3.105654  | 1.347288  |
| 9             | 1             | 0           | -1.783315               | 2.987981  | 0.112547  |
| 10            | 6             | 0           | -2.149482               | 0.170038  | 0.330439  |
| 11            | 6             | 0           | -2.428932               | -1.003020 | 1.045071  |
| 12            | 6             | 0           | -2.955052               | 0.499201  | -0.771067 |
| 13            | 6             | 0           | -3.489619               | -1.832276 | 0.669310  |
| 14            | 1             | 0           | -1.824058               | -1.264787 | 1.911328  |
| 15            | 6             | 0           | -4.009530               | -0.332472 | -1.153800 |
| 16            | 1             | 0           | -2.779104               | 1.414525  | -1.333182 |
| 17            | 6             | 0           | -4.279390               | -1.500078 | -0.433713 |
| 18            | 1             | 0           | -3.700159               | -2.731955 | 1.240869  |
| 19            | 1             | 0           | -4.626069               | -0.063194 | -2.006838 |
| 20            | 1             | 0           | -5.105561               | -2.141700 | -0.726575 |
| 21            | 6             | 0           | 2.354189                | 0.205747  | 0.038244  |
| 22            | 6             | 0           | 3.711732                | 0.120690  | 0.332536  |
| 23            | 6             | 0           | 4.321902                | -1.134019 | 0.252789  |
| 24            | 1             | 0           | 4.278585                | 1.000959  | 0.618593  |
| 25            | 6             | 0           | 2.221345                | -2.104896 | -0.392147 |
| 26            | 6             | 0           | 3.574214                | -2.260507 | -0.115056 |
| 27            | 1             | 0           | 5.379579                | -1.236048 | 0.477671  |
| 28            | 1             | 0           | 1.574242                | -2.927175 | -0.679599 |
| 29            | 1             | 0           | 4.032915                | -3.241119 | -0.182550 |
| 30            | 7             | 0           | 1.660657                | -0.888009 | -0.305839 |
| 31            | 1             | 0           | 1.432414                | 1.863474  | 1.062205  |
| 32            | 1             | 0           | 0.551128                | -0.352920 | -0.455651 |
| 33            | 6             | 0           | 1.939668                | 2.537229  | -0.927588 |
| 34            | 1             | 0           | 2.954845                | 2.858931  | -0.675551 |
| 35            | 1             | 0           | 1.952572                | 2.164782  | -1.958634 |
| 36            | 1             | 0           | 1.288518                | 3.415673  | -0.877291 |

Imaginary frequency of  $-1211.9917 \text{ cm}^{-1}$

B3LYP/6-31+G(d),  $\text{CH}_2\text{Cl}_2$  (PCM-UFF)

| Center Number | Atomic Number | Atomic Type | Coordinates (Angstroms) |           |           |
|---------------|---------------|-------------|-------------------------|-----------|-----------|
|               |               |             | X                       | Y         | Z         |
| 1             | 6             | 0           | 1.454344                | 1.439254  | 0.068997  |
| 2             | 7             | 0           | 0.103665                | 0.909846  | -0.286966 |
| 3             | 1             | 0           | -0.200071               | 1.280355  | -1.188445 |
| 4             | 6             | 0           | -0.992462               | 1.059352  | 0.729425  |
| 5             | 1             | 0           | -0.577809               | 0.660880  | 1.661233  |
| 6             | 6             | 0           | -1.378773               | 2.527973  | 0.946205  |
| 7             | 1             | 0           | -2.169674               | 2.593824  | 1.700061  |
| 8             | 1             | 0           | -0.525715               | 3.115383  | 1.302083  |
| 9             | 1             | 0           | -1.749664               | 2.988147  | 0.024001  |
| 10            | 6             | 0           | -2.161039               | 0.174460  | 0.319748  |
| 11            | 6             | 0           | -2.461916               | -0.973109 | 1.067070  |
| 12            | 6             | 0           | -2.949013               | 0.473685  | -0.803125 |
| 13            | 6             | 0           | -3.526234               | -1.804897 | 0.704971  |
| 14            | 1             | 0           | -1.862851               | -1.216512 | 1.942023  |
| 15            | 6             | 0           | -4.008162               | -0.359795 | -1.171925 |
| 16            | 1             | 0           | -2.749093               | 1.362431  | -1.397449 |
| 17            | 6             | 0           | -4.300692               | -1.501189 | -0.417992 |
| 18            | 1             | 0           | -3.747752               | -2.687040 | 1.299816  |
| 19            | 1             | 0           | -4.607679               | -0.114046 | -2.044405 |
| 20            | 1             | 0           | -5.128023               | -2.145798 | -0.702382 |
| 21            | 6             | 0           | 2.362798                | 0.198416  | 0.044856  |
| 22            | 6             | 0           | 3.726078                | 0.129487  | 0.316294  |
| 23            | 6             | 0           | 4.346354                | -1.119077 | 0.229867  |
| 24            | 1             | 0           | 4.287927                | 1.016486  | 0.589174  |
| 25            | 6             | 0           | 2.245128                | -2.111341 | -0.379215 |
| 26            | 6             | 0           | 3.603430                | -2.253602 | -0.122174 |
| 27            | 1             | 0           | 5.408202                | -1.209778 | 0.437304  |
| 28            | 1             | 0           | 1.602733                | -2.940408 | -0.655469 |
| 29            | 1             | 0           | 4.069528                | -3.229964 | -0.193862 |
| 30            | 7             | 0           | 1.674065                | -0.900692 | -0.287342 |
| 31            | 1             | 0           | 1.423904                | 1.824921  | 1.093253  |
| 32            | 1             | 0           | 0.552442                | -0.361435 | -0.429847 |
| 33            | 6             | 0           | 1.933413                | 2.542584  | -0.879212 |
| 34            | 1             | 0           | 2.939756                | 2.870813  | -0.602728 |
| 35            | 1             | 0           | 1.963429                | 2.185966  | -1.914807 |
| 36            | 1             | 0           | 1.266799                | 3.408485  | -0.822136 |

Imaginary frequency of  $-1312.4095 \text{ cm}^{-1}$

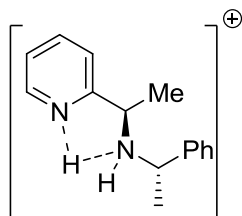

(*R,S*)-TS-1

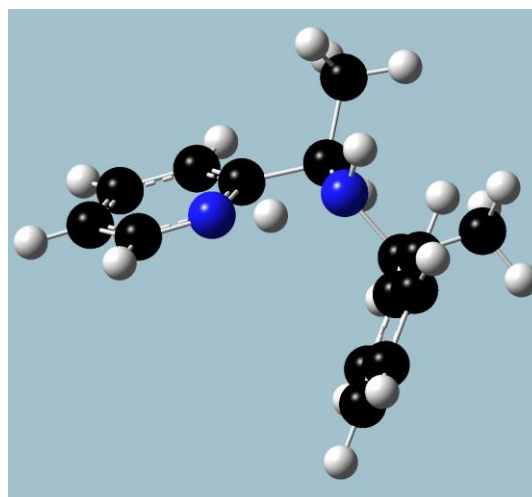

B3LYP/6-31+G(d,p), CH<sub>2</sub>Cl<sub>2</sub> (PCM-UFF)

| Center Number | Atomic Number | Atomic Type | Coordinates (Angstroms) |           |           |
|---------------|---------------|-------------|-------------------------|-----------|-----------|
|               |               |             | X                       | Y         | Z         |
| 1             | 6             | 0           | 1.454641                | 1.439598  | 0.066029  |
| 2             | 7             | 0           | 0.103732                | 0.911023  | -0.290569 |
| 3             | 1             | 0           | -0.202277               | 1.290294  | -1.186466 |
| 4             | 6             | 0           | -0.989765               | 1.056781  | 0.730029  |
| 5             | 1             | 0           | -0.574610               | 0.654061  | 1.659269  |
| 6             | 6             | 0           | -1.374936               | 2.524198  | 0.954302  |
| 7             | 1             | 0           | -2.161263               | 2.586805  | 1.711490  |
| 8             | 1             | 0           | -0.520990               | 3.109506  | 1.307936  |
| 9             | 1             | 0           | -1.750018               | 2.986858  | 0.036293  |
| 10            | 6             | 0           | -2.159569               | 0.173581  | 0.320391  |
| 11            | 6             | 0           | -2.453948               | -0.980505 | 1.059997  |
| 12            | 6             | 0           | -2.954515               | 0.480882  | -0.795217 |
| 13            | 6             | 0           | -3.518874               | -1.810852 | 0.697245  |
| 14            | 1             | 0           | -1.849681               | -1.229703 | 1.928748  |
| 15            | 6             | 0           | -4.014183               | -0.351328 | -1.164559 |
| 16            | 1             | 0           | -2.759807               | 1.374175  | -1.382917 |
| 17            | 6             | 0           | -4.300277               | -1.499178 | -0.418424 |
| 18            | 1             | 0           | -3.735481               | -2.697577 | 1.285554  |
| 19            | 1             | 0           | -4.618889               | -0.099767 | -2.030769 |
| 20            | 1             | 0           | -5.127588               | -2.142341 | -0.703021 |
| 21            | 6             | 0           | 2.361289                | 0.198695  | 0.042701  |
| 22            | 6             | 0           | 3.724246                | 0.129134  | 0.315658  |
| 23            | 6             | 0           | 4.343080                | -1.119786 | 0.230816  |
| 24            | 1             | 0           | 4.285707                | 1.015593  | 0.588085  |
| 25            | 6             | 0           | 2.241841                | -2.110623 | -0.379861 |
| 26            | 6             | 0           | 3.599379                | -2.253645 | -0.121225 |
| 27            | 1             | 0           | 5.403924                | -1.211634 | 0.439340  |
| 28            | 1             | 0           | 1.600632                | -2.939890 | -0.656136 |
| 29            | 1             | 0           | 4.064166                | -3.229878 | -0.191654 |
| 30            | 7             | 0           | 1.671271                | -0.899348 | -0.289450 |
| 31            | 1             | 0           | 1.426096                | 1.824649  | 1.090261  |
| 32            | 1             | 0           | 0.557142                | -0.355534 | -0.432547 |
| 33            | 6             | 0           | 1.935198                | 2.542832  | -0.881163 |
| 34            | 1             | 0           | 2.941963                | 2.866982  | -0.605910 |
| 35            | 1             | 0           | 1.962426                | 2.187308  | -1.916131 |
| 36            | 1             | 0           | 1.271882                | 3.409661  | -0.821622 |

Imaginary frequency of -1214.8351 cm<sup>-1</sup>

B3LYP/6-31+G(d,p), CH<sub>2</sub>Cl<sub>2</sub> (CPCM-Bondi)

| Center Number | Atomic Number | Atomic Type | Coordinates (Angstroms) |           |           |
|---------------|---------------|-------------|-------------------------|-----------|-----------|
|               |               |             | X                       | Y         | Z         |
| 1             | 6             | 0           | 1.461607                | 1.446327  | 0.058157  |
| 2             | 7             | 0           | 0.110189                | 0.938471  | -0.319521 |
| 3             | 1             | 0           | -0.194816               | 1.352762  | -1.199732 |
| 4             | 6             | 0           | -0.968553               | 1.055433  | 0.714620  |
| 5             | 1             | 0           | -0.536686               | 0.641653  | 1.630999  |
| 6             | 6             | 0           | -1.368115               | 2.515174  | 0.965775  |
| 7             | 1             | 0           | -2.128921               | 2.560146  | 1.750531  |
| 8             | 1             | 0           | -0.508700               | 3.108651  | 1.291919  |
| 9             | 1             | 0           | -1.780624               | 2.973747  | 0.061468  |
| 10            | 6             | 0           | -2.142390               | 0.172953  | 0.313649  |
| 11            | 6             | 0           | -2.448206               | -0.967706 | 1.069981  |
| 12            | 6             | 0           | -2.937515               | 0.472745  | -0.804710 |
| 13            | 6             | 0           | -3.523738               | -1.792089 | 0.721592  |
| 14            | 1             | 0           | -1.843659               | -1.211144 | 1.940164  |
| 15            | 6             | 0           | -4.007893               | -0.352997 | -1.159775 |
| 16            | 1             | 0           | -2.729571               | 1.354877  | -1.404939 |
| 17            | 6             | 0           | -4.305487               | -1.487634 | -0.396581 |
| 18            | 1             | 0           | -3.747889               | -2.668713 | 1.322516  |
| 19            | 1             | 0           | -4.611698               | -0.107451 | -2.028656 |
| 20            | 1             | 0           | -5.140509               | -2.125871 | -0.670246 |
| 21            | 6             | 0           | 2.352382                | 0.195740  | 0.044761  |
| 22            | 6             | 0           | 3.702949                | 0.101589  | 0.370104  |
| 23            | 6             | 0           | 4.309496                | -1.152937 | 0.280278  |
| 24            | 1             | 0           | 4.260626                | 0.976337  | 0.685164  |
| 25            | 6             | 0           | 2.221240                | -2.102724 | -0.434131 |
| 26            | 6             | 0           | 3.566188                | -2.269002 | -0.127550 |
| 27            | 1             | 0           | 5.360083                | -1.264136 | 0.528504  |
| 28            | 1             | 0           | 1.580499                | -2.917249 | -0.752444 |
| 29            | 1             | 0           | 4.021569                | -3.249511 | -0.202853 |
| 30            | 7             | 0           | 1.663061                | -0.886017 | -0.337401 |
| 31            | 1             | 0           | 1.427002                | 1.832129  | 1.081558  |
| 32            | 1             | 0           | 0.563256                | -0.336653 | -0.495122 |
| 33            | 6             | 0           | 1.971184                | 2.542377  | -0.882832 |
| 34            | 1             | 0           | 2.982021                | 2.845747  | -0.597616 |
| 35            | 1             | 0           | 1.997357                | 2.185969  | -1.917821 |
| 36            | 1             | 0           | 1.319009                | 3.418040  | -0.824959 |

Imaginary frequency of -1253.4500 cm<sup>-1</sup>

Cartesian coordinates of the TS for the proton transfer of the protonated (*S,S*)-1 species

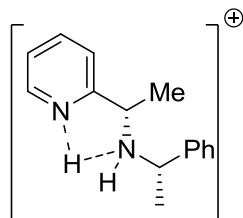

(*S,S*)-TS-1

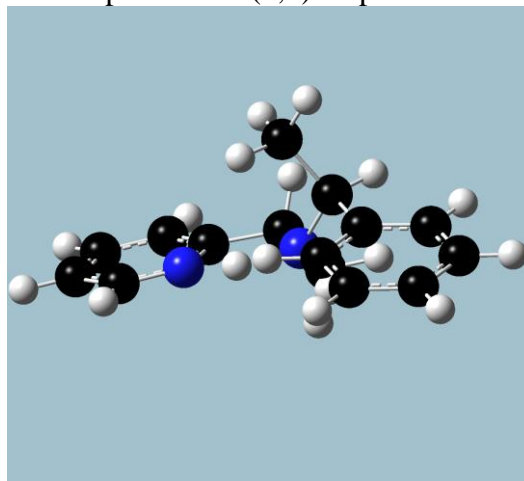

B3LYP/6-31+G(d), gas phase

| Center Number | Atomic Number | Atomic Type | Coordinates (Angstroms) |           |           |
|---------------|---------------|-------------|-------------------------|-----------|-----------|
|               |               |             | X                       | Y         | Z         |
| 1             | 6             | 0           | -1.259008               | 1.419771  | -0.027772 |
| 2             | 1             | 0           | -1.227964               | 1.883413  | 0.964414  |
| 3             | 7             | 0           | -0.032071               | 0.585007  | -0.198022 |
| 4             | 1             | 0           | -0.751394               | -0.581154 | -0.277316 |
| 5             | 6             | 0           | 1.028757                | 0.685874  | 0.874199  |
| 6             | 1             | 0           | 1.175637                | 1.753971  | 1.081642  |
| 7             | 6             | 0           | 0.559925                | -0.005777 | 2.158758  |
| 8             | 1             | 0           | 1.315898                | 0.130010  | 2.937631  |
| 9             | 1             | 0           | -0.380055               | 0.414865  | 2.535505  |
| 10            | 1             | 0           | 0.423844                | -1.082191 | 2.011765  |
| 11            | 6             | 0           | 2.330425                | 0.131623  | 0.321228  |
| 12            | 6             | 0           | 3.428742                | 0.983985  | 0.143222  |
| 13            | 6             | 0           | 2.460963                | -1.223199 | -0.023899 |
| 14            | 6             | 0           | 4.635547                | 0.495159  | -0.365488 |
| 15            | 1             | 0           | 3.346635                | 2.035181  | 0.412239  |
| 16            | 6             | 0           | 3.663025                | -1.711588 | -0.538948 |
| 17            | 1             | 0           | 1.628748                | -1.909749 | 0.116880  |
| 18            | 6             | 0           | 4.753556                | -0.852882 | -0.709779 |
| 19            | 1             | 0           | 5.479785                | 1.167230  | -0.490656 |
| 20            | 1             | 0           | 3.751283                | -2.762520 | -0.800046 |
| 21            | 1             | 0           | 5.690406                | -1.234996 | -1.105128 |
| 22            | 6             | 0           | -2.419787               | 0.412204  | -0.063199 |
| 23            | 6             | 0           | -3.783191               | 0.663560  | 0.059589  |
| 24            | 6             | 0           | -4.659016               | -0.423098 | -0.009449 |
| 25            | 1             | 0           | -4.154694               | 1.672409  | 0.207804  |
| 26            | 6             | 0           | -2.788227               | -1.899138 | -0.311310 |
| 27            | 6             | 0           | -4.161493               | -1.719115 | -0.199344 |
| 28            | 1             | 0           | -5.729023               | -0.262030 | 0.084301  |
| 29            | 1             | 0           | -2.327553               | -2.870773 | -0.457370 |
| 30            | 1             | 0           | -4.827538               | -2.573234 | -0.257928 |
| 31            | 7             | 0           | -1.968638               | -0.837944 | -0.238910 |
| 32            | 1             | 0           | 0.402089                | 0.781700  | -1.101174 |
| 33            | 6             | 0           | -1.383641               | 2.513490  | -1.094622 |
| 34            | 1             | 0           | -1.403414               | 2.083972  | -2.103003 |
| 35            | 1             | 0           | -2.304604               | 3.088160  | -0.955707 |
| 36            | 1             | 0           | -0.542593               | 3.211081  | -1.024457 |

Imaginary frequency of  $-1237.2225 \text{ cm}^{-1}$

B3LYP/6-31+G(d), CH<sub>2</sub>Cl<sub>2</sub> (PCM-UFF)

| Center Number | Atomic Number | Atomic Type | Coordinates (Angstroms) |           |           |
|---------------|---------------|-------------|-------------------------|-----------|-----------|
|               |               |             | X                       | Y         | Z         |
| 1             | 6             | 0           | -1.276655               | 1.428866  | -0.035207 |
| 2             | 1             | 0           | -1.247564               | 1.895532  | 0.954249  |
| 3             | 7             | 0           | -0.036445               | 0.611747  | -0.215672 |
| 4             | 1             | 0           | -0.720804               | -0.550705 | -0.286500 |
| 5             | 6             | 0           | 1.026879                | 0.735994  | 0.843179  |
| 6             | 1             | 0           | 1.187518                | 1.806469  | 1.020097  |
| 7             | 6             | 0           | 0.565198                | 0.084328  | 2.151785  |
| 8             | 1             | 0           | 1.334352                | 0.230752  | 2.916047  |
| 9             | 1             | 0           | -0.361946               | 0.532425  | 2.525251  |
| 10            | 1             | 0           | 0.405599                | -0.992051 | 2.033475  |
| 11            | 6             | 0           | 2.323630                | 0.149269  | 0.307122  |
| 12            | 6             | 0           | 3.432458                | 0.982878  | 0.105322  |
| 13            | 6             | 0           | 2.441571                | -1.217220 | 0.005162  |
| 14            | 6             | 0           | 4.636725                | 0.465944  | -0.383529 |
| 15            | 1             | 0           | 3.356517                | 2.043266  | 0.335495  |
| 16            | 6             | 0           | 3.640980                | -1.734665 | -0.489884 |
| 17            | 1             | 0           | 1.600051                | -1.888388 | 0.158597  |
| 18            | 6             | 0           | 4.742803                | -0.894388 | -0.684360 |
| 19            | 1             | 0           | 5.487370                | 1.126312  | -0.529452 |
| 20            | 1             | 0           | 3.716148                | -2.794205 | -0.719651 |
| 21            | 1             | 0           | 5.676585                | -1.298769 | -1.065762 |
| 22            | 6             | 0           | -2.417331               | 0.400870  | -0.063624 |
| 23            | 6             | 0           | -3.783734               | 0.632572  | 0.063460  |
| 24            | 6             | 0           | -4.641057               | -0.468482 | 0.002330  |
| 25            | 1             | 0           | -4.169068               | 1.635944  | 0.208999  |
| 26            | 6             | 0           | -2.747040               | -1.914555 | -0.300970 |
| 27            | 6             | 0           | -4.122798               | -1.756722 | -0.183660 |
| 28            | 1             | 0           | -5.712776               | -0.324579 | 0.099413  |
| 29            | 1             | 0           | -2.270578               | -2.878333 | -0.444111 |
| 30            | 1             | 0           | -4.774142               | -2.622093 | -0.235055 |
| 31            | 7             | 0           | -1.945257               | -0.840704 | -0.236960 |
| 32            | 1             | 0           | 0.377191                | 0.812844  | -1.127075 |
| 33            | 6             | 0           | -1.424936               | 2.518594  | -1.101111 |
| 34            | 1             | 0           | -1.455543               | 2.085763  | -2.106973 |
| 35            | 1             | 0           | -2.349732               | 3.081812  | -0.943669 |
| 36            | 1             | 0           | -0.587429               | 3.221004  | -1.041025 |

Imaginary frequency of  $-1336.5017 \text{ cm}^{-1}$

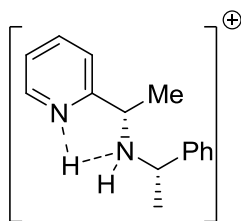

(S,S)-TS-1

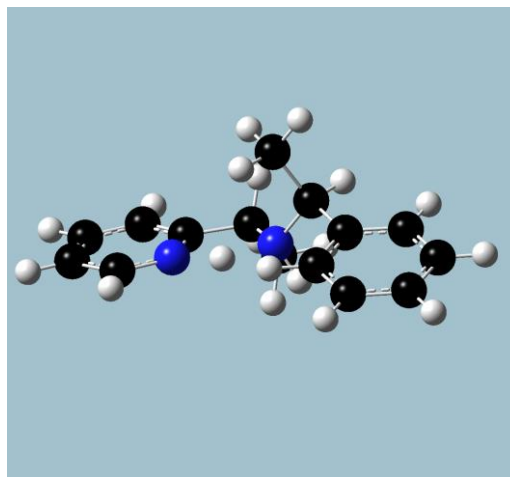

B3LYP/6-31+G(d,p), CH<sub>2</sub>Cl<sub>2</sub> (PCM-UFF)

| Center Number | Atomic Number | Atomic Type | Coordinates (Angstroms) |           |           |
|---------------|---------------|-------------|-------------------------|-----------|-----------|
|               |               |             | X                       | Y         | Z         |
| 1             | 6             | 0           | -1.277552               | 1.429753  | -0.035925 |
| 2             | 1             | 0           | -1.250990               | 1.894935  | 0.954010  |
| 3             | 7             | 0           | -0.036359               | 0.614648  | -0.217802 |
| 4             | 1             | 0           | -0.722682               | -0.542968 | -0.287810 |
| 5             | 6             | 0           | 1.025816                | 0.737770  | 0.842981  |
| 6             | 1             | 0           | 1.188718                | 1.807179  | 1.020722  |
| 7             | 6             | 0           | 0.562495                | 0.086056  | 2.150745  |
| 8             | 1             | 0           | 1.330842                | 0.230496  | 2.914455  |
| 9             | 1             | 0           | -0.362900               | 0.535312  | 2.523790  |
| 10            | 1             | 0           | 0.401471                | -0.988942 | 2.031119  |
| 11            | 6             | 0           | 2.322314                | 0.150142  | 0.307496  |
| 12            | 6             | 0           | 3.431498                | 0.982842  | 0.105017  |
| 13            | 6             | 0           | 2.438798                | -1.216494 | 0.006116  |
| 14            | 6             | 0           | 4.634961                | 0.464557  | -0.383806 |
| 15            | 1             | 0           | 3.356332                | 2.042596  | 0.334662  |
| 16            | 6             | 0           | 3.637432                | -1.734973 | -0.489024 |
| 17            | 1             | 0           | 1.597283                | -1.886285 | 0.159918  |
| 18            | 6             | 0           | 4.739712                | -0.895772 | -0.684029 |
| 19            | 1             | 0           | 5.485613                | 1.123469  | -0.530198 |
| 20            | 1             | 0           | 3.711741                | -2.793844 | -0.718322 |
| 21            | 1             | 0           | 5.672355                | -1.300769 | -1.065232 |
| 22            | 6             | 0           | -2.415543               | 0.400183  | -0.064320 |
| 23            | 6             | 0           | -3.782269               | 0.629938  | 0.062968  |
| 24            | 6             | 0           | -4.637229               | -0.472471 | 0.002688  |
| 25            | 1             | 0           | -4.168527               | 1.632244  | 0.207796  |
| 26            | 6             | 0           | -2.740976               | -1.915357 | -0.300444 |
| 27            | 6             | 0           | -4.116580               | -1.759678 | -0.182762 |
| 28            | 1             | 0           | -5.708553               | -0.330856 | 0.099909  |
| 29            | 1             | 0           | -2.264617               | -2.878618 | -0.443277 |
| 30            | 1             | 0           | -4.765821               | -2.625710 | -0.233504 |
| 31            | 7             | 0           | -1.940564               | -0.840143 | -0.237060 |
| 32            | 1             | 0           | 0.379453                | 0.823584  | -1.125212 |
| 33            | 6             | 0           | -1.428685               | 2.520660  | -1.099905 |
| 34            | 1             | 0           | -1.456213               | 2.089019  | -2.105273 |
| 35            | 1             | 0           | -2.355167               | 3.078997  | -0.942817 |
| 36            | 1             | 0           | -0.595044               | 3.225688  | -1.037483 |

Imaginary frequency of -1239.4090 cm<sup>-1</sup>

B3LYP/6-31+G(d,p), CH<sub>2</sub>Cl<sub>2</sub> (CPCM-Bondi)

| Center Number | Atomic Number | Atomic Type | Coordinates (Angstroms) |           |           |
|---------------|---------------|-------------|-------------------------|-----------|-----------|
|               |               |             | X                       | Y         | Z         |
| 1             | 6             | 0           | -1.277236               | 1.423635  | -0.076147 |
| 2             | 1             | 0           | -1.248589               | 1.913371  | 0.901674  |
| 3             | 7             | 0           | -0.041989               | 0.599113  | -0.237705 |
| 4             | 1             | 0           | -0.737695               | -0.566633 | -0.256548 |
| 5             | 6             | 0           | 1.028503                | 0.770265  | 0.800043  |
| 6             | 1             | 0           | 1.190211                | 1.845800  | 0.937069  |
| 7             | 6             | 0           | 0.588751                | 0.161973  | 2.137726  |
| 8             | 1             | 0           | 1.364653                | 0.340627  | 2.887009  |
| 9             | 1             | 0           | -0.338427               | 0.616076  | 2.500814  |
| 10            | 1             | 0           | 0.436248                | -0.917964 | 2.049844  |
| 11            | 6             | 0           | 2.323092                | 0.164033  | 0.281296  |
| 12            | 6             | 0           | 3.471207                | 0.960688  | 0.169666  |
| 13            | 6             | 0           | 2.402072                | -1.190593 | -0.081948 |
| 14            | 6             | 0           | 4.676687                | 0.418330  | -0.289372 |
| 15            | 1             | 0           | 3.423568                | 2.011302  | 0.444659  |
| 16            | 6             | 0           | 3.602832                | -1.732798 | -0.547840 |
| 17            | 1             | 0           | 1.526075                | -1.828290 | -0.001336 |
| 18            | 6             | 0           | 4.744806                | -0.930053 | -0.651157 |
| 19            | 1             | 0           | 5.557033                | 1.049780  | -0.366899 |
| 20            | 1             | 0           | 3.647733                | -2.781577 | -0.827045 |
| 21            | 1             | 0           | 5.678342                | -1.353196 | -1.010353 |
| 22            | 6             | 0           | -2.420053               | 0.400001  | -0.071842 |
| 23            | 6             | 0           | -3.786723               | 0.638180  | 0.047809  |
| 24            | 6             | 0           | -4.645449               | -0.462842 | 0.026832  |
| 25            | 1             | 0           | -4.167855               | 1.647152  | 0.156331  |
| 26            | 6             | 0           | -2.753842               | -1.922471 | -0.223366 |
| 27            | 6             | 0           | -4.129133               | -1.758257 | -0.112157 |
| 28            | 1             | 0           | -5.716466               | -0.314153 | 0.119116  |
| 29            | 1             | 0           | -2.280200               | -2.891820 | -0.330541 |
| 30            | 1             | 0           | -4.781580               | -2.623400 | -0.132104 |
| 31            | 7             | 0           | -1.950563               | -0.847829 | -0.198903 |
| 32            | 1             | 0           | 0.360015                | 0.765763  | -1.159894 |
| 33            | 6             | 0           | -1.423225               | 2.487101  | -1.167682 |
| 34            | 1             | 0           | -1.443815               | 2.026317  | -2.160594 |
| 35            | 1             | 0           | -2.349784               | 3.050344  | -1.028302 |
| 36            | 1             | 0           | -0.585342               | 3.188355  | -1.117816 |

Imaginary frequency of -1273.7346 cm<sup>-1</sup>

Cartesian coordinates of the (R,S)-2 species

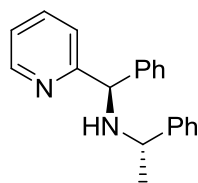

(R,S)-2

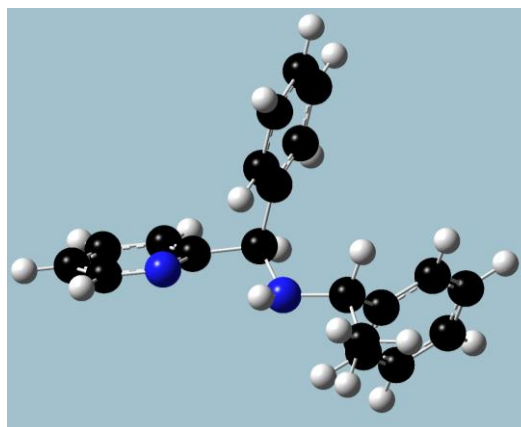

B3LYP/6-31+G(d), gas phase

| Center Number | Atomic Number | Atomic Type | Coordinates (Angstroms) |           |           |
|---------------|---------------|-------------|-------------------------|-----------|-----------|
|               |               |             | X                       | Y         | Z         |
| 1             | 6             | 0           | -0.555078               | -0.227750 | -0.095917 |
| 2             | 7             | 0           | 0.142456                | -0.661786 | 1.117550  |
| 3             | 1             | 0           | -0.502970               | -0.635627 | 1.903722  |
| 4             | 6             | 0           | 1.402865                | 0.015939  | 1.431296  |
| 5             | 1             | 0           | 1.295918                | 1.113808  | 1.383306  |
| 6             | 6             | 0           | 1.808370                | -0.347855 | 2.870051  |
| 7             | 1             | 0           | 2.757618                | 0.129990  | 3.133680  |
| 8             | 1             | 0           | 1.046765                | -0.009146 | 3.584817  |
| 9             | 1             | 0           | 1.925815                | -1.432297 | 2.975317  |
| 10            | 6             | 0           | 2.500127                | -0.376796 | 0.444966  |
| 11            | 6             | 0           | 3.407696                | 0.582212  | -0.023355 |
| 12            | 6             | 0           | 2.654074                | -1.706810 | 0.026445  |
| 13            | 6             | 0           | 4.453196                | 0.224748  | -0.880901 |
| 14            | 1             | 0           | 3.292658                | 1.620578  | 0.282840  |
| 15            | 6             | 0           | 3.694897                | -2.067877 | -0.832423 |
| 16            | 1             | 0           | 1.942142                | -2.451024 | 0.373533  |
| 17            | 6             | 0           | 4.600113                | -1.103508 | -1.288582 |
| 18            | 1             | 0           | 5.146702                | 0.984394  | -1.234022 |
| 19            | 1             | 0           | 3.799550                | -3.103581 | -1.147811 |
| 20            | 1             | 0           | 5.409500                | -1.384922 | -1.957864 |
| 21            | 6             | 0           | -1.849177               | -1.025355 | -0.223902 |
| 22            | 6             | 0           | -2.269701               | -1.529087 | -1.461607 |
| 23            | 6             | 0           | -3.474511               | -2.226475 | -1.535567 |
| 24            | 1             | 0           | -1.658797               | -1.376163 | -2.347259 |
| 25            | 6             | 0           | -3.723359               | -1.865955 | 0.817387  |
| 26            | 6             | 0           | -4.223523               | -2.401727 | -0.370587 |
| 27            | 1             | 0           | -3.820236               | -2.629566 | -2.484218 |
| 28            | 1             | 0           | -4.272034               | -1.981060 | 1.750793  |
| 29            | 1             | 0           | -5.166965               | -2.939994 | -0.377482 |
| 30            | 7             | 0           | -2.568319               | -1.193516 | 0.896644  |
| 31            | 6             | 0           | -0.838617               | 1.281439  | -0.195640 |
| 32            | 6             | 0           | -1.611870               | 1.943139  | 0.770880  |
| 33            | 6             | 0           | -0.314662               | 2.027348  | -1.258894 |
| 34            | 6             | 0           | -1.853325               | 3.314633  | 0.673152  |
| 35            | 1             | 0           | -2.036024               | 1.376446  | 1.595825  |
| 36            | 6             | 0           | -0.555681               | 3.401723  | -1.362038 |
| 37            | 1             | 0           | 0.296396                | 1.530788  | -2.010478 |
| 38            | 6             | 0           | -1.326403               | 4.049867  | -0.394764 |
| 39            | 1             | 0           | -2.456786               | 3.810923  | 1.429606  |
| 40            | 1             | 0           | -0.137320               | 3.962960  | -2.194225 |
| 41            | 1             | 0           | -1.515271               | 5.117892  | -0.469776 |
| 42            | 1             | 0           | 0.081790                | -0.488413 | -0.949659 |

B3LYP/6-31+G(d), CH<sub>2</sub>Cl<sub>2</sub> (PCM-UFF)

| Center Number | Atomic Number | Atomic Type | Coordinates (Angstroms) |           |           |
|---------------|---------------|-------------|-------------------------|-----------|-----------|
|               |               |             | X                       | Y         | Z         |
| 1             | 6             | 0           | -0.543068               | -0.228185 | -0.071052 |
| 2             | 7             | 0           | 0.163331                | -0.644804 | 1.145933  |
| 3             | 1             | 0           | -0.472244               | -0.577822 | 1.938162  |
| 4             | 6             | 0           | 1.426022                | 0.046760  | 1.435894  |
| 5             | 1             | 0           | 1.306446                | 1.142105  | 1.378525  |
| 6             | 6             | 0           | 1.852633                | -0.296507 | 2.873489  |
| 7             | 1             | 0           | 2.794107                | 0.203797  | 3.123117  |
| 8             | 1             | 0           | 1.091397                | 0.033575  | 3.592047  |
| 9             | 1             | 0           | 1.993403                | -1.377351 | 2.988889  |
| 10            | 6             | 0           | 2.514577                | -0.342209 | 0.439029  |
| 11            | 6             | 0           | 3.379300                | 0.632225  | -0.078222 |
| 12            | 6             | 0           | 2.708171                | -1.679103 | 0.058439  |
| 13            | 6             | 0           | 4.419172                | 0.284248  | -0.947819 |
| 14            | 1             | 0           | 3.236662                | 1.674988  | 0.199516  |
| 15            | 6             | 0           | 3.743204                | -2.031766 | -0.811990 |
| 16            | 1             | 0           | 2.034793                | -2.440382 | 0.443031  |
| 17            | 6             | 0           | 4.604528                | -1.050936 | -1.318121 |
| 18            | 1             | 0           | 5.077760                | 1.056145  | -1.338827 |
| 19            | 1             | 0           | 3.877383                | -3.072661 | -1.097230 |
| 20            | 1             | 0           | 5.408816                | -1.325149 | -1.996287 |
| 21            | 6             | 0           | -1.822574               | -1.050638 | -0.204894 |
| 22            | 6             | 0           | -2.218091               | -1.569570 | -1.444594 |
| 23            | 6             | 0           | -3.410930               | -2.287762 | -1.529920 |
| 24            | 1             | 0           | -1.598752               | -1.413168 | -2.323541 |
| 25            | 6             | 0           | -3.696678               | -1.918014 | 0.818493  |
| 26            | 6             | 0           | -4.172187               | -2.468125 | -0.373361 |
| 27            | 1             | 0           | -3.737064               | -2.702401 | -2.480098 |
| 28            | 1             | 0           | -4.256642               | -2.038741 | 1.744073  |
| 29            | 1             | 0           | -5.106349               | -3.021513 | -0.388945 |
| 30            | 7             | 0           | -2.552604               | -1.224421 | 0.909107  |
| 31            | 6             | 0           | -0.860911               | 1.273421  | -0.178146 |
| 32            | 6             | 0           | -1.551110               | 1.949508  | 0.840119  |
| 33            | 6             | 0           | -0.465499               | 1.995652  | -1.312051 |
| 34            | 6             | 0           | -1.838448               | 3.311829  | 0.724967  |
| 35            | 1             | 0           | -1.871315               | 1.406083  | 1.725446  |
| 36            | 6             | 0           | -0.753066               | 3.360065  | -1.433657 |
| 37            | 1             | 0           | 0.077084                | 1.488172  | -2.107496 |
| 38            | 6             | 0           | -1.441100               | 4.022923  | -0.413886 |
| 39            | 1             | 0           | -2.374299               | 3.818992  | 1.523757  |
| 40            | 1             | 0           | -0.435002               | 3.902315  | -2.320828 |
| 41            | 1             | 0           | -1.664653               | 5.083039  | -0.502531 |
| 42            | 1             | 0           | 0.099709                | -0.478344 | -0.922358 |

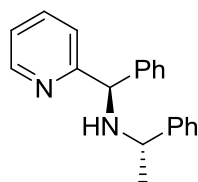

(*R,S*)-2

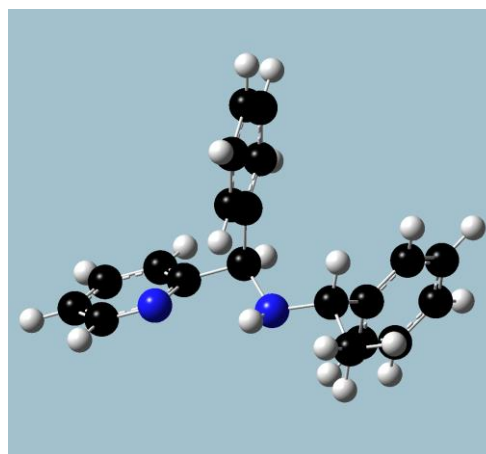

B3LYP/6-31+G(d,p), CH<sub>2</sub>Cl<sub>2</sub> (PCM-UFF)

| Center Number | Atomic Number | Atomic Type | Coordinates (Angstroms) |           |           |
|---------------|---------------|-------------|-------------------------|-----------|-----------|
|               |               |             | X                       | Y         | Z         |
| 1             | 6             | 0           | -0.545435               | -0.230049 | -0.074972 |
| 2             | 7             | 0           | 0.159675                | -0.649997 | 1.140851  |
| 3             | 1             | 0           | -0.476414               | -0.591234 | 1.931634  |
| 4             | 6             | 0           | 1.422946                | 0.037007  | 1.435333  |
| 5             | 1             | 0           | 1.308042                | 1.132411  | 1.379736  |
| 6             | 6             | 0           | 1.845653                | -0.310810 | 2.872695  |
| 7             | 1             | 0           | 2.786392                | 0.186651  | 3.125489  |
| 8             | 1             | 0           | 1.083686                | 0.018017  | 3.589157  |
| 9             | 1             | 0           | 1.984116                | -1.391305 | 2.984337  |
| 10            | 6             | 0           | 2.512401                | -0.351568 | 0.439218  |
| 11            | 6             | 0           | 3.385384                | 0.620924  | -0.067421 |
| 12            | 6             | 0           | 2.697633                | -1.686696 | 0.048913  |
| 13            | 6             | 0           | 4.425296                | 0.272345  | -0.936344 |
| 14            | 1             | 0           | 3.249044                | 1.661589  | 0.218054  |
| 15            | 6             | 0           | 3.732675                | -2.039585 | -0.821104 |
| 16            | 1             | 0           | 2.017572                | -2.444980 | 0.425564  |
| 17            | 6             | 0           | 4.602248                | -1.060973 | -1.316665 |
| 18            | 1             | 0           | 5.090173                | 1.041848  | -1.318986 |
| 19            | 1             | 0           | 3.860380                | -3.078236 | -1.114180 |
| 20            | 1             | 0           | 5.405952                | -1.335176 | -1.994162 |
| 21            | 6             | 0           | -1.829591               | -1.044622 | -0.208025 |
| 22            | 6             | 0           | -2.235765               | -1.549365 | -1.450137 |
| 23            | 6             | 0           | -3.432684               | -2.260119 | -1.534479 |
| 24            | 1             | 0           | -1.621249               | -1.388107 | -2.330545 |
| 25            | 6             | 0           | -3.702208               | -1.911427 | 0.818968  |
| 26            | 6             | 0           | -4.187626               | -2.447282 | -0.375010 |
| 27            | 1             | 0           | -3.766835               | -2.663843 | -2.485667 |
| 28            | 1             | 0           | -4.257716               | -2.038488 | 1.745689  |
| 29            | 1             | 0           | -5.124108               | -2.995091 | -0.389947 |
| 30            | 7             | 0           | -2.553393               | -1.225018 | 0.908855  |
| 31            | 6             | 0           | -0.854481               | 1.273440  | -0.179555 |
| 32            | 6             | 0           | -1.557677               | 1.946449  | 0.831791  |
| 33            | 6             | 0           | -0.435700               | 2.000466  | -1.301690 |
| 34            | 6             | 0           | -1.834691               | 3.310982  | 0.721164  |
| 35            | 1             | 0           | -1.895941               | 1.398340  | 1.706522  |
| 36            | 6             | 0           | -0.712874               | 3.367315  | -1.418330 |
| 37            | 1             | 0           | 0.116887                | 1.495181  | -2.090443 |
| 38            | 6             | 0           | -1.413829               | 4.027196  | -0.405798 |
| 39            | 1             | 0           | -2.380619               | 3.815752  | 1.513476  |
| 40            | 1             | 0           | -0.377105               | 3.913431  | -2.295509 |
| 41            | 1             | 0           | -1.629292               | 5.088415  | -0.490832 |
| 42            | 1             | 0           | 0.093013                | -0.481842 | -0.928651 |

B3LYP/6-31+G(d,p), CH<sub>2</sub>Cl<sub>2</sub> (CPCM-Bondi)

| Center Number | Atomic Number | Atomic Type | Coordinates (Angstroms) |           |           |
|---------------|---------------|-------------|-------------------------|-----------|-----------|
|               |               |             | X                       | Y         | Z         |
| 1             | 6             | 0           | -0.524170               | -0.213880 | -0.039126 |
| 2             | 7             | 0           | 0.203073                | -0.577425 | 1.184377  |
| 3             | 1             | 0           | -0.415363               | -0.473329 | 1.985008  |
| 4             | 6             | 0           | 1.456875                | 0.156662  | 1.425272  |
| 5             | 1             | 0           | 1.308382                | 1.242611  | 1.313857  |
| 6             | 6             | 0           | 1.906513                | -0.103707 | 2.872258  |
| 7             | 1             | 0           | 2.835890                | 0.432825  | 3.084596  |
| 8             | 1             | 0           | 1.143187                | 0.241709  | 3.579160  |
| 9             | 1             | 0           | 2.077368                | -1.172556 | 3.039377  |
| 10            | 6             | 0           | 2.540400                | -0.251802 | 0.431298  |
| 11            | 6             | 0           | 3.317387                | 0.725462  | -0.206504 |
| 12            | 6             | 0           | 2.816694                | -1.603203 | 0.168408  |
| 13            | 6             | 0           | 4.349433                | 0.367423  | -1.082136 |
| 14            | 1             | 0           | 3.111955                | 1.776778  | -0.018437 |
| 15            | 6             | 0           | 3.843822                | -1.966169 | -0.707226 |
| 16            | 1             | 0           | 2.218810                | -2.372244 | 0.648820  |
| 17            | 6             | 0           | 4.615715                | -0.981373 | -1.336171 |
| 18            | 1             | 0           | 4.938391                | 1.140970  | -1.567341 |
| 19            | 1             | 0           | 4.042378                | -3.017222 | -0.899138 |
| 20            | 1             | 0           | 5.413433                | -1.263535 | -2.017502 |
| 21            | 6             | 0           | -1.756783               | -1.105797 | -0.174917 |
| 22            | 6             | 0           | -2.085635               | -1.690084 | -1.404950 |
| 23            | 6             | 0           | -3.235141               | -2.475108 | -1.497854 |
| 24            | 1             | 0           | -1.448532               | -1.531101 | -2.269289 |
| 25            | 6             | 0           | -3.613837               | -2.040028 | 0.826374  |
| 26            | 6             | 0           | -4.020894               | -2.656654 | -0.357960 |
| 27            | 1             | 0           | -3.508880               | -2.939448 | -2.440645 |
| 28            | 1             | 0           | -4.195668               | -2.159671 | 1.737605  |
| 29            | 1             | 0           | -4.922408               | -3.260053 | -0.379885 |
| 30            | 7             | 0           | -2.511552               | -1.279914 | 0.923572  |
| 31            | 6             | 0           | -0.925091               | 1.266006  | -0.166612 |
| 32            | 6             | 0           | -1.555420               | 1.952326  | 0.883333  |
| 33            | 6             | 0           | -0.679959               | 1.953845  | -1.363702 |
| 34            | 6             | 0           | -1.933034               | 3.290123  | 0.737230  |
| 35            | 1             | 0           | -1.754484               | 1.443072  | 1.821950  |
| 36            | 6             | 0           | -1.058536               | 3.292597  | -1.515781 |
| 37            | 1             | 0           | -0.185526               | 1.438954  | -2.184064 |
| 38            | 6             | 0           | -1.687491               | 3.965750  | -0.464179 |
| 39            | 1             | 0           | -2.418914               | 3.804995  | 1.561506  |
| 40            | 1             | 0           | -0.856863               | 3.807550  | -2.451009 |
| 41            | 1             | 0           | -1.980371               | 5.005706  | -0.576534 |
| 42            | 1             | 0           | 0.131484                | -0.438972 | -0.886014 |

Cartesian coordinates of the ammonium-(*R,S*)-2 species

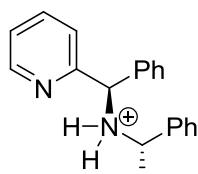

(*R,S*)-Ammonium 2

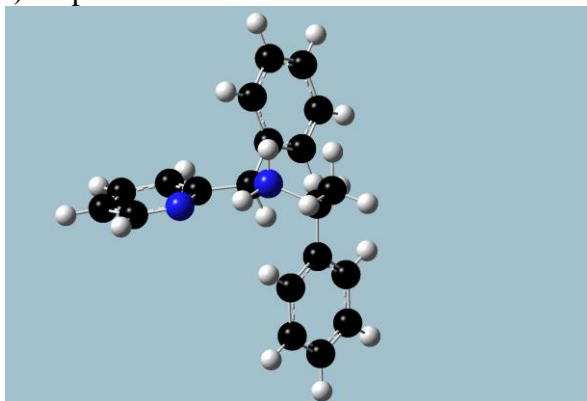

B3LYP/6-31+G(d), gas phase

| Center Number | Atomic Number | Atomic Type | Coordinates (Angstroms) |           |           |
|---------------|---------------|-------------|-------------------------|-----------|-----------|
|               |               |             | X                       | Y         | Z         |
| 1             | 6             | 0           | 0.580871                | 0.045984  | -0.063972 |
| 2             | 7             | 0           | -0.183987               | -0.132219 | 1.243077  |
| 3             | 1             | 0           | 0.489745                | -0.372487 | 1.978292  |
| 4             | 6             | 0           | -1.308508               | -1.169054 | 1.260974  |
| 5             | 1             | 0           | -0.838882               | -2.092865 | 0.910123  |
| 6             | 6             | 0           | -1.762055               | -1.346224 | 2.713311  |
| 7             | 1             | 0           | -2.539616               | -2.114162 | 2.752144  |
| 8             | 1             | 0           | -0.936660               | -1.673037 | 3.357758  |
| 9             | 1             | 0           | -2.187296               | -0.423795 | 3.123224  |
| 10            | 6             | 0           | -2.413510               | -0.770778 | 0.303375  |
| 11            | 6             | 0           | -2.750529               | -1.625765 | -0.755312 |
| 12            | 6             | 0           | -3.138387               | 0.418958  | 0.476724  |
| 13            | 6             | 0           | -3.793788               | -1.300598 | -1.626839 |
| 14            | 1             | 0           | -2.206450               | -2.558186 | -0.892152 |
| 15            | 6             | 0           | -4.172946               | 0.749340  | -0.399904 |
| 16            | 1             | 0           | -2.910332               | 1.094593  | 1.298924  |
| 17            | 6             | 0           | -4.503322               | -0.110525 | -1.452330 |
| 18            | 1             | 0           | -4.050261               | -1.976500 | -2.437587 |
| 19            | 1             | 0           | -4.726533               | 1.672831  | -0.256334 |
| 20            | 1             | 0           | -5.313734               | 0.144947  | -2.128933 |
| 21            | 6             | 0           | 0.989120                | 1.523803  | -0.137404 |
| 22            | 6             | 0           | 1.923641                | 1.980667  | -1.069227 |
| 23            | 6             | 0           | 2.180980                | 3.351056  | -1.125606 |
| 24            | 1             | 0           | 2.436359                | 1.286596  | -1.727614 |
| 25            | 6             | 0           | 0.599304                | 3.659073  | 0.650194  |
| 26            | 6             | 0           | 1.508901                | 4.208808  | -0.251619 |
| 27            | 1             | 0           | 2.898942                | 3.742738  | -1.840386 |
| 28            | 1             | 0           | 0.055479                | 4.282816  | 1.354576  |
| 29            | 1             | 0           | 1.686512                | 5.279386  | -0.264270 |
| 30            | 7             | 0           | 0.341531                | 2.342825  | 0.702211  |
| 31            | 6             | 0           | 1.706178                | -0.961871 | -0.168206 |
| 32            | 6             | 0           | 2.826043                | -0.875534 | 0.676092  |
| 33            | 6             | 0           | 1.630798                | -2.004051 | -1.101662 |
| 34            | 6             | 0           | 3.843833                | -1.826775 | 0.595875  |
| 35            | 1             | 0           | 2.921005                | -0.051429 | 1.381934  |
| 36            | 6             | 0           | 2.655784                | -2.951080 | -1.188501 |
| 37            | 1             | 0           | 0.775975                | -2.072167 | -1.771107 |
| 38            | 6             | 0           | 3.759481                | -2.866129 | -0.337193 |
| 39            | 1             | 0           | 4.706851                | -1.750428 | 1.251072  |
| 40            | 1             | 0           | 2.590339                | -3.751304 | -1.920040 |
| 41            | 1             | 0           | 4.555898                | -3.601750 | -0.403337 |
| 42            | 1             | 0           | -0.159036               | -0.144924 | -0.848275 |
| 43            | 1             | 0           | -0.522448               | 0.829054  | 1.472343  |

B3LYP/6-31+G(d), CH<sub>2</sub>Cl<sub>2</sub> (PCM-UFF)

| Center Number | Atomic Number | Atomic Type | Coordinates (Angstroms) |           |           |
|---------------|---------------|-------------|-------------------------|-----------|-----------|
|               |               |             | X                       | Y         | Z         |
| 1             | 6             | 0           | 0.579861                | 0.051047  | -0.043935 |
| 2             | 7             | 0           | -0.196951               | -0.151437 | 1.249225  |
| 3             | 1             | 0           | 0.461686                | -0.388531 | 1.999076  |
| 4             | 6             | 0           | -1.298957               | -1.211820 | 1.229096  |
| 5             | 1             | 0           | -0.814366               | -2.111330 | 0.840753  |
| 6             | 6             | 0           | -1.741171               | -1.461216 | 2.673000  |
| 7             | 1             | 0           | -2.498298               | -2.250145 | 2.679741  |
| 8             | 1             | 0           | -0.898742               | -1.794254 | 3.289785  |
| 9             | 1             | 0           | -2.179750               | -0.567298 | 3.127794  |
| 10            | 6             | 0           | -2.416538               | -0.799730 | 0.290102  |
| 11            | 6             | 0           | -2.695189               | -1.584480 | -0.837896 |
| 12            | 6             | 0           | -3.203570               | 0.335437  | 0.541208  |
| 13            | 6             | 0           | -3.741099               | -1.244016 | -1.701181 |
| 14            | 1             | 0           | -2.096449               | -2.469769 | -1.039173 |
| 15            | 6             | 0           | -4.241744               | 0.681912  | -0.325843 |
| 16            | 1             | 0           | -3.019041               | 0.956628  | 1.414404  |
| 17            | 6             | 0           | -4.513833               | -0.107838 | -1.448240 |
| 18            | 1             | 0           | -3.947474               | -1.864585 | -2.568732 |
| 19            | 1             | 0           | -4.840644               | 1.565057  | -0.121699 |
| 20            | 1             | 0           | -5.325007               | 0.160952  | -2.119228 |
| 21            | 6             | 0           | 0.973025                | 1.531738  | -0.113927 |
| 22            | 6             | 0           | 1.930891                | 1.988723  | -1.022930 |
| 23            | 6             | 0           | 2.178649                | 3.360040  | -1.086304 |
| 24            | 1             | 0           | 2.467275                | 1.293634  | -1.660293 |
| 25            | 6             | 0           | 0.539823                | 3.670462  | 0.635946  |
| 26            | 6             | 0           | 1.472797                | 4.220475  | -0.241799 |
| 27            | 1             | 0           | 2.914583                | 3.749882  | -1.783332 |
| 28            | 1             | 0           | -0.031787               | 4.297504  | 1.315016  |
| 29            | 1             | 0           | 1.641147                | 5.292365  | -0.259396 |
| 30            | 7             | 0           | 0.291117                | 2.352836  | 0.694922  |
| 31            | 6             | 0           | 1.720774                | -0.940287 | -0.154311 |
| 32            | 6             | 0           | 2.827898                | -0.862912 | 0.706464  |
| 33            | 6             | 0           | 1.672113                | -1.954561 | -1.119381 |
| 34            | 6             | 0           | 3.860450                | -1.797251 | 0.610758  |
| 35            | 1             | 0           | 2.897866                | -0.065922 | 1.444096  |
| 36            | 6             | 0           | 2.710858                | -2.885349 | -1.220670 |
| 37            | 1             | 0           | 0.824584                | -2.014979 | -1.797850 |
| 38            | 6             | 0           | 3.803213                | -2.810582 | -0.353095 |
| 39            | 1             | 0           | 4.712171                | -1.729081 | 1.281612  |
| 40            | 1             | 0           | 2.663306                | -3.665816 | -1.974802 |
| 41            | 1             | 0           | 4.609903                | -3.534361 | -0.428958 |
| 42            | 1             | 0           | -0.145470               | -0.141411 | -0.840293 |
| 43            | 1             | 0           | -0.564157               | 0.792910  | 1.490080  |



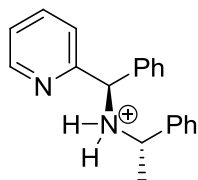

(*R,S*)-Ammonium **2**

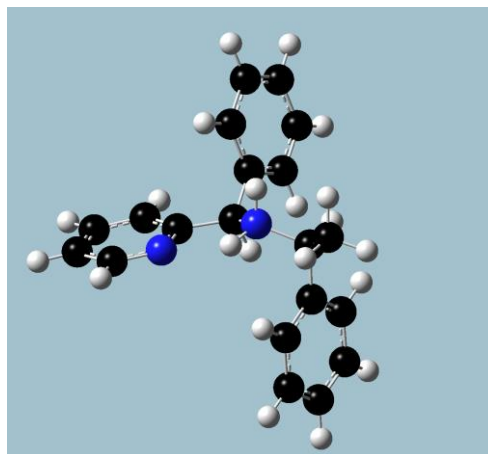

B3LYP/6-31+G(d,p), CH<sub>2</sub>Cl<sub>2</sub> (PCM-UFF)

| Center Number | Atomic Number | Atomic Type | Coordinates (Angstroms) |           |           |
|---------------|---------------|-------------|-------------------------|-----------|-----------|
|               |               |             | X                       | Y         | Z         |
| 1             | 6             | 0           | 0.583025                | 0.046229  | -0.048128 |
| 2             | 7             | 0           | -0.191539               | -0.170472 | 1.242373  |
| 3             | 1             | 0           | 0.469687                | -0.401053 | 1.990069  |
| 4             | 6             | 0           | -1.279695               | -1.243716 | 1.218761  |
| 5             | 1             | 0           | -0.787884               | -2.135102 | 0.821985  |
| 6             | 6             | 0           | -1.715610               | -1.508414 | 2.661548  |
| 7             | 1             | 0           | -2.464913               | -2.303225 | 2.663950  |
| 8             | 1             | 0           | -0.869500               | -1.838200 | 3.272998  |
| 9             | 1             | 0           | -2.160396               | -0.622113 | 3.122887  |
| 10            | 6             | 0           | -2.404604               | -0.837946 | 0.285669  |
| 11            | 6             | 0           | -2.668705               | -1.609394 | -0.854753 |
| 12            | 6             | 0           | -3.210757               | 0.279651  | 0.554090  |
| 13            | 6             | 0           | -3.719652               | -1.273115 | -1.713299 |
| 14            | 1             | 0           | -2.054700               | -2.480124 | -1.069194 |
| 15            | 6             | 0           | -4.253971               | 0.621779  | -0.308234 |
| 16            | 1             | 0           | -3.037157               | 0.889595  | 1.436524  |
| 17            | 6             | 0           | -4.511749               | -0.154720 | -1.442967 |
| 18            | 1             | 0           | -3.914846               | -1.882626 | -2.590215 |
| 19            | 1             | 0           | -4.867831               | 1.490441  | -0.091053 |
| 20            | 1             | 0           | -5.326546               | 0.110396  | -2.109725 |
| 21            | 6             | 0           | 0.939026                | 1.536084  | -0.115476 |
| 22            | 6             | 0           | 1.879761                | 2.023007  | -1.026533 |
| 23            | 6             | 0           | 2.091696                | 3.400391  | -1.081273 |
| 24            | 1             | 0           | 2.429253                | 1.345977  | -1.670841 |
| 25            | 6             | 0           | 0.455180                | 3.658319  | 0.651968  |
| 26            | 6             | 0           | 1.368904                | 4.236832  | -0.227022 |
| 27            | 1             | 0           | 2.812929                | 3.813847  | -1.778881 |
| 28            | 1             | 0           | -0.127808               | 4.266352  | 1.337634  |
| 29            | 1             | 0           | 1.509924                | 5.311928  | -0.238269 |
| 30            | 7             | 0           | 0.241272                | 2.334009  | 0.702642  |
| 31            | 6             | 0           | 1.748901                | -0.916083 | -0.155950 |
| 32            | 6             | 0           | 2.849867                | -0.814273 | 0.710141  |
| 33            | 6             | 0           | 1.729195                | -1.928007 | -1.124326 |
| 34            | 6             | 0           | 3.905675                | -1.721935 | 0.615146  |
| 35            | 1             | 0           | 2.896839                | -0.020394 | 1.451781  |
| 36            | 6             | 0           | 2.791556                | -2.831532 | -1.224856 |
| 37            | 1             | 0           | 0.886171                | -2.007237 | -1.805157 |
| 38            | 6             | 0           | 3.878181                | -2.732163 | -0.352956 |
| 39            | 1             | 0           | 4.751893                | -1.635346 | 1.289526  |
| 40            | 1             | 0           | 2.766905                | -3.609672 | -1.981328 |
| 41            | 1             | 0           | 4.702743                | -3.434333 | -0.428406 |
| 42            | 1             | 0           | -0.132916               | -0.162414 | -0.848455 |
| 43            | 1             | 0           | -0.567312               | 0.772571  | 1.479757  |

B3LYP/6-31+G(d,p), CH<sub>2</sub>Cl<sub>2</sub> (CPCM-Bondi)

| Center Number | Atomic Number | Atomic Type | Coordinates (Angstroms) |           |           |
|---------------|---------------|-------------|-------------------------|-----------|-----------|
|               |               |             | X                       | Y         | Z         |
| 1             | 6             | 0           | 0.571640                | 0.044050  | -0.024754 |
| 2             | 7             | 0           | -0.199833               | -0.145013 | 1.268638  |
| 3             | 1             | 0           | 0.457789                | -0.397882 | 2.012571  |
| 4             | 6             | 0           | -1.322638               | -1.178078 | 1.251283  |
| 5             | 1             | 0           | -0.856332               | -2.093799 | 0.881958  |
| 6             | 6             | 0           | -1.794337               | -1.392798 | 2.691188  |
| 7             | 1             | 0           | -2.571159               | -2.161189 | 2.696281  |
| 8             | 1             | 0           | -0.971641               | -1.734600 | 3.327086  |
| 9             | 1             | 0           | -2.214734               | -0.477014 | 3.116986  |
| 10            | 6             | 0           | -2.426657               | -0.763357 | 0.295050  |
| 11            | 6             | 0           | -2.718629               | -1.573864 | -0.811382 |
| 12            | 6             | 0           | -3.193912               | 0.393095  | 0.511608  |
| 13            | 6             | 0           | -3.757428               | -1.239529 | -1.686533 |
| 14            | 1             | 0           | -2.133742               | -2.472784 | -0.987208 |
| 15            | 6             | 0           | -4.224894               | 0.733339  | -0.367372 |
| 16            | 1             | 0           | -2.995939               | 1.034848  | 1.366219  |
| 17            | 6             | 0           | -4.510728               | -0.082915 | -1.467735 |
| 18            | 1             | 0           | -3.973057               | -1.879916 | -2.536616 |
| 19            | 1             | 0           | -4.807584               | 1.632377  | -0.190027 |
| 20            | 1             | 0           | -5.315597               | 0.181179  | -2.147216 |
| 21            | 6             | 0           | 0.989937                | 1.516567  | -0.108472 |
| 22            | 6             | 0           | 1.928400                | 1.948481  | -1.050925 |
| 23            | 6             | 0           | 2.209724                | 3.311943  | -1.129337 |
| 24            | 1             | 0           | 2.423303                | 1.238012  | -1.703619 |
| 25            | 6             | 0           | 0.637383                | 3.671215  | 0.643447  |
| 26            | 6             | 0           | 1.555172                | 4.194138  | -0.265519 |
| 27            | 1             | 0           | 2.930995                | 3.679405  | -1.852475 |
| 28            | 1             | 0           | 0.105340                | 4.317307  | 1.336193  |
| 29            | 1             | 0           | 1.750107                | 5.260696  | -0.292690 |
| 30            | 7             | 0           | 0.355717                | 2.359205  | 0.717719  |
| 31            | 6             | 0           | 1.701954                | -0.961016 | -0.141348 |
| 32            | 6             | 0           | 2.818553                | -0.892438 | 0.707886  |
| 33            | 6             | 0           | 1.633752                | -1.977662 | -1.102828 |
| 34            | 6             | 0           | 3.843134                | -1.835092 | 0.602347  |
| 35            | 1             | 0           | 2.894689                | -0.097887 | 1.446413  |
| 36            | 6             | 0           | 2.664246                | -2.917293 | -1.214094 |
| 37            | 1             | 0           | 0.777139                | -2.033677 | -1.768630 |
| 38            | 6             | 0           | 3.768041                | -2.849453 | -0.359789 |
| 39            | 1             | 0           | 4.701575                | -1.773643 | 1.264387  |
| 40            | 1             | 0           | 2.601797                | -3.699124 | -1.964938 |
| 41            | 1             | 0           | 4.567888                | -3.579076 | -0.443538 |
| 42            | 1             | 0           | -0.152901               | -0.138817 | -0.823019 |
| 43            | 1             | 0           | -0.545397               | 0.800254  | 1.521040  |

Cartesian coordinates of the pyridinium-(*R,S*)-2 species

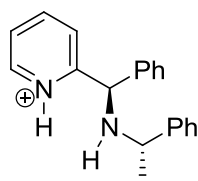

(*R,S*)-Pyridinium 2

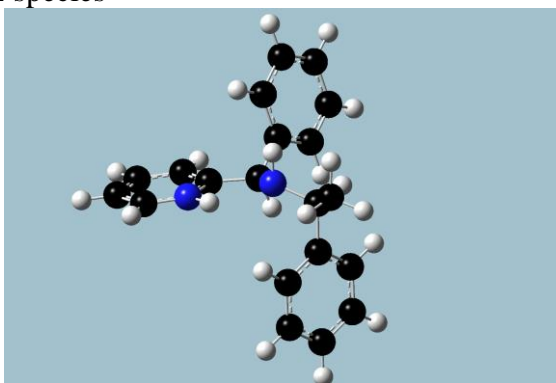

B3LYP/6-31+G(d), gas phase

| Center Number | Atomic Number | Atomic Type | Coordinates (Angstroms) |           |           |
|---------------|---------------|-------------|-------------------------|-----------|-----------|
|               |               |             | X                       | Y         | Z         |
| 1             | 6             | 0           | 0.607851                | -0.050041 | -0.008490 |
| 2             | 7             | 0           | -0.130913               | -0.400336 | 1.224680  |
| 3             | 1             | 0           | 0.542061                | -0.649469 | 1.949885  |
| 4             | 6             | 0           | -1.096804               | -1.531362 | 1.079318  |
| 5             | 1             | 0           | -0.596444               | -2.372152 | 0.574887  |
| 6             | 6             | 0           | -1.505442               | -2.002535 | 2.480494  |
| 7             | 1             | 0           | -2.210516               | -2.835381 | 2.404290  |
| 8             | 1             | 0           | -0.632940               | -2.352337 | 3.046530  |
| 9             | 1             | 0           | -1.988084               | -1.200403 | 3.049229  |
| 10            | 6             | 0           | -2.283614               | -1.113237 | 0.223054  |
| 11            | 6             | 0           | -2.567231               | -1.791984 | -0.969499 |
| 12            | 6             | 0           | -3.132296               | -0.065320 | 0.615843  |
| 13            | 6             | 0           | -3.667958               | -1.434304 | -1.756054 |
| 14            | 1             | 0           | -1.932013               | -2.619396 | -1.280452 |
| 15            | 6             | 0           | -4.230860               | 0.296014  | -0.166003 |
| 16            | 1             | 0           | -2.951744               | 0.454913  | 1.554576  |
| 17            | 6             | 0           | -4.500141               | -0.386972 | -1.357422 |
| 18            | 1             | 0           | -3.875113               | -1.977489 | -2.674043 |
| 19            | 1             | 0           | -4.886479               | 1.099555  | 0.159573  |
| 20            | 1             | 0           | -5.358757               | -0.110005 | -1.962688 |
| 21            | 6             | 0           | 0.693356                | 1.474412  | -0.105483 |
| 22            | 6             | 0           | 1.447300                | 2.205685  | -1.022783 |
| 23            | 6             | 0           | 1.360307                | 3.597189  | -1.019239 |
| 24            | 1             | 0           | 2.092819                | 1.682774  | -1.719955 |
| 25            | 6             | 0           | -0.196189               | 3.496291  | 0.799879  |
| 26            | 6             | 0           | 0.530728                | 4.255743  | -0.097871 |
| 27            | 1             | 0           | 1.940680                | 4.175860  | -1.731995 |
| 28            | 1             | 0           | -0.860194               | 3.910646  | 1.549902  |
| 29            | 1             | 0           | 0.454007                | 5.337065  | -0.077900 |
| 30            | 7             | 0           | -0.087544               | 2.150839  | 0.758482  |
| 31            | 6             | 0           | 1.965661                | -0.721696 | -0.158756 |
| 32            | 6             | 0           | 3.022808                | -0.405642 | 0.710487  |
| 33            | 6             | 0           | 2.163601                | -1.695705 | -1.146105 |
| 34            | 6             | 0           | 4.250624                | -1.059724 | 0.598690  |
| 35            | 1             | 0           | 2.894659                | 0.355793  | 1.478981  |
| 36            | 6             | 0           | 3.394507                | -2.349668 | -1.260102 |
| 37            | 1             | 0           | 1.355650                | -1.946602 | -1.830059 |
| 38            | 6             | 0           | 4.438130                | -2.034009 | -0.387737 |
| 39            | 1             | 0           | 5.060572                | -0.807805 | 1.277494  |
| 40            | 1             | 0           | 3.534779                | -3.103928 | -2.029209 |
| 41            | 1             | 0           | 5.394251                | -2.541937 | -0.475284 |
| 42            | 1             | 0           | -0.023140               | -0.353721 | -0.854543 |
| 43            | 1             | 0           | -0.590881               | 1.501700  | 1.395332  |

B3LYP/6-31+G(d), CH<sub>2</sub>Cl<sub>2</sub> (PCM-UFF)

| Center Number | Atomic Number | Atomic Type | Coordinates (Angstroms) |           |           |
|---------------|---------------|-------------|-------------------------|-----------|-----------|
|               |               |             | X                       | Y         | Z         |
| 1             | 6             | 0           | 0.549099                | 0.017665  | 0.019333  |
| 2             | 7             | 0           | -0.224215               | -0.069505 | 1.273486  |
| 3             | 1             | 0           | 0.409903                | -0.288592 | 2.042634  |
| 4             | 6             | 0           | -1.308939               | -1.085300 | 1.271055  |
| 5             | 1             | 0           | -0.909953               | -2.057535 | 0.943250  |
| 6             | 6             | 0           | -1.817104               | -1.249646 | 2.710229  |
| 7             | 1             | 0           | -2.604553               | -2.008763 | 2.746092  |
| 8             | 1             | 0           | -1.005128               | -1.572339 | 3.373579  |
| 9             | 1             | 0           | -2.226638               | -0.308846 | 3.093827  |
| 10            | 6             | 0           | -2.424208               | -0.695861 | 0.309608  |
| 11            | 6             | 0           | -2.850456               | -1.598854 | -0.673994 |
| 12            | 6             | 0           | -3.071303               | 0.546586  | 0.405839  |
| 13            | 6             | 0           | -3.900088               | -1.274853 | -1.541240 |
| 14            | 1             | 0           | -2.358773               | -2.565531 | -0.762056 |
| 15            | 6             | 0           | -4.116523               | 0.876166  | -0.460146 |
| 16            | 1             | 0           | -2.760150               | 1.259039  | 1.165646  |
| 17            | 6             | 0           | -4.534881               | -0.034588 | -1.437681 |
| 18            | 1             | 0           | -4.216293               | -1.989612 | -2.296664 |
| 19            | 1             | 0           | -4.608151               | 1.841610  | -0.370208 |
| 20            | 1             | 0           | -5.349106               | 0.221593  | -2.110442 |
| 21            | 6             | 0           | 1.053221                | 1.449580  | -0.148184 |
| 22            | 6             | 0           | 1.971294                | 1.883998  | -1.101142 |
| 23            | 6             | 0           | 2.286483                | 3.240346  | -1.177202 |
| 24            | 1             | 0           | 2.428549                | 1.164027  | -1.769868 |
| 25            | 6             | 0           | 0.789388                | 3.687983  | 0.637488  |
| 26            | 6             | 0           | 1.692964                | 4.156813  | -0.298134 |
| 27            | 1             | 0           | 2.997727                | 3.586780  | -1.920378 |
| 28            | 1             | 0           | 0.280640                | 4.313193  | 1.360656  |
| 29            | 1             | 0           | 1.928483                | 5.213683  | -0.337629 |
| 30            | 7             | 0           | 0.506677                | 2.368529  | 0.672636  |
| 31            | 6             | 0           | 1.656337                | -1.020121 | -0.132908 |
| 32            | 6             | 0           | 2.800227                | -0.982417 | 0.681005  |
| 33            | 6             | 0           | 1.520085                | -2.056795 | -1.065633 |
| 34            | 6             | 0           | 3.782904                | -1.967855 | 0.568042  |
| 35            | 1             | 0           | 2.934193                | -0.179305 | 1.403317  |
| 36            | 6             | 0           | 2.504682                | -3.044086 | -1.181010 |
| 37            | 1             | 0           | 0.641613                | -2.094470 | -1.705793 |
| 38            | 6             | 0           | 3.636763                | -3.002226 | -0.363586 |
| 39            | 1             | 0           | 4.663615                | -1.925804 | 1.203204  |
| 40            | 1             | 0           | 2.384649                | -3.842411 | -1.908373 |
| 41            | 1             | 0           | 4.402826                | -3.767767 | -0.451760 |
| 42            | 1             | 0           | -0.168493               | -0.133122 | -0.797472 |
| 43            | 1             | 0           | -0.161871               | 1.961784  | 1.345157  |

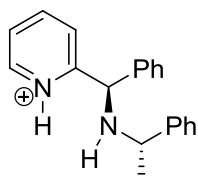

(*R,S*)-Pyridinium **2**

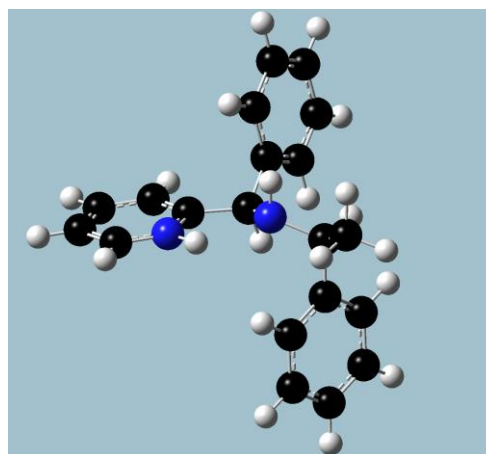

B3LYP/6-31+G(d,p), CH<sub>2</sub>Cl<sub>2</sub> (PCM-UFF)

| Center Number | Atomic Number | Atomic Type | Coordinates (Angstroms) |           |           |
|---------------|---------------|-------------|-------------------------|-----------|-----------|
|               |               |             | X                       | Y         | Z         |
| 1             | 6             | 0           | 0.550353                | 0.016643  | 0.020026  |
| 2             | 7             | 0           | -0.220488               | -0.083108 | 1.274377  |
| 3             | 1             | 0           | 0.414757                | -0.301855 | 2.040988  |
| 4             | 6             | 0           | -1.299393               | -1.105068 | 1.268388  |
| 5             | 1             | 0           | -0.896365               | -2.073000 | 0.934732  |
| 6             | 6             | 0           | -1.804719               | -1.279396 | 2.706919  |
| 7             | 1             | 0           | -2.585987               | -2.043315 | 2.740216  |
| 8             | 1             | 0           | -0.990233               | -1.598722 | 3.366791  |
| 9             | 1             | 0           | -2.219697               | -0.343745 | 3.094279  |
| 10            | 6             | 0           | -2.416578               | -0.717900 | 0.308377  |
| 11            | 6             | 0           | -2.832131               | -1.616253 | -0.683865 |
| 12            | 6             | 0           | -3.074719               | 0.517875  | 0.413770  |
| 13            | 6             | 0           | -3.882232               | -1.293959 | -1.550852 |
| 14            | 1             | 0           | -2.331993               | -2.577068 | -0.778325 |
| 15            | 6             | 0           | -4.120137               | 0.845634  | -0.452295 |
| 16            | 1             | 0           | -2.772454               | 1.225705  | 1.180321  |
| 17            | 6             | 0           | -4.527837               | -0.060328 | -1.438453 |
| 18            | 1             | 0           | -4.190277               | -2.004342 | -2.312547 |
| 19            | 1             | 0           | -4.620253               | 1.805114  | -0.355708 |
| 20            | 1             | 0           | -5.341888               | 0.194256  | -2.110685 |
| 21            | 6             | 0           | 1.034231                | 1.454959  | -0.145981 |
| 22            | 6             | 0           | 1.944898                | 1.903174  | -1.099655 |
| 23            | 6             | 0           | 2.240289                | 3.263655  | -1.173770 |
| 24            | 1             | 0           | 2.411242                | 1.190891  | -1.769190 |
| 25            | 6             | 0           | 0.739144                | 3.687085  | 0.643192  |
| 26            | 6             | 0           | 1.634693                | 4.169950  | -0.292572 |
| 27            | 1             | 0           | 2.945203                | 3.621408  | -1.916670 |
| 28            | 1             | 0           | 0.223294                | 4.304726  | 1.367029  |
| 29            | 1             | 0           | 1.854828                | 5.229432  | -0.330544 |
| 30            | 7             | 0           | 0.475284                | 2.363789  | 0.676664  |
| 31            | 6             | 0           | 1.670907                | -1.005912 | -0.134092 |
| 32            | 6             | 0           | 2.817049                | -0.950429 | 0.675466  |
| 33            | 6             | 0           | 1.544430                | -2.047130 | -1.062882 |
| 34            | 6             | 0           | 3.811840                | -1.923204 | 0.561767  |
| 35            | 1             | 0           | 2.942592                | -0.144428 | 1.394767  |
| 36            | 6             | 0           | 2.541436                | -3.021520 | -1.178866 |
| 37            | 1             | 0           | 0.664705                | -2.097931 | -1.699015 |
| 38            | 6             | 0           | 3.675806                | -2.962046 | -0.366097 |
| 39            | 1             | 0           | 4.693645                | -1.867949 | 1.192985  |
| 40            | 1             | 0           | 2.429498                | -3.823092 | -1.902711 |
| 41            | 1             | 0           | 4.450997                | -3.717103 | -0.454833 |
| 42            | 1             | 0           | -0.163782               | -0.141672 | -0.797983 |
| 43            | 1             | 0           | -0.185377               | 1.942938  | 1.347660  |

B3LYP/6-31+G(d,p), CH<sub>2</sub>Cl<sub>2</sub> (CPCM-Bondi)

| Center Number | Atomic Number | Atomic Type | Coordinates (Angstroms) |           |           |
|---------------|---------------|-------------|-------------------------|-----------|-----------|
|               |               |             | X                       | Y         | Z         |
| 1             | 6             | 0           | 0.547409                | 0.021970  | 0.013960  |
| 2             | 7             | 0           | -0.235460               | -0.055071 | 1.259758  |
| 3             | 1             | 0           | 0.391566                | -0.262580 | 2.035798  |
| 4             | 6             | 0           | -1.322044               | -1.063862 | 1.255530  |
| 5             | 1             | 0           | -0.935417               | -2.037796 | 0.919945  |
| 6             | 6             | 0           | -1.831287               | -1.231925 | 2.694422  |
| 7             | 1             | 0           | -2.623387               | -1.985102 | 2.726728  |
| 8             | 1             | 0           | -1.020842               | -1.561024 | 3.354602  |
| 9             | 1             | 0           | -2.233828               | -0.289142 | 3.079047  |
| 10            | 6             | 0           | -2.441802               | -0.662673 | 0.303119  |
| 11            | 6             | 0           | -2.922320               | -1.579404 | -0.642426 |
| 12            | 6             | 0           | -3.042498               | 0.604780  | 0.375145  |
| 13            | 6             | 0           | -3.980703               | -1.244636 | -1.495361 |
| 14            | 1             | 0           | -2.465351               | -2.563612 | -0.712353 |
| 15            | 6             | 0           | -4.096498               | 0.944913  | -0.477013 |
| 16            | 1             | 0           | -2.684524               | 1.328554  | 1.101877  |
| 17            | 6             | 0           | -4.570177               | 0.020216  | -1.415937 |
| 18            | 1             | 0           | -4.338491               | -1.969181 | -2.221414 |
| 19            | 1             | 0           | -4.550528               | 1.929534  | -0.407262 |
| 20            | 1             | 0           | -5.389774               | 0.284712  | -2.077789 |
| 21            | 6             | 0           | 1.088601                | 1.440607  | -0.144963 |
| 22            | 6             | 0           | 2.027487                | 1.850081  | -1.089442 |
| 23            | 6             | 0           | 2.379358                | 3.197111  | -1.162992 |
| 24            | 1             | 0           | 2.471261                | 1.118599  | -1.753584 |
| 25            | 6             | 0           | 0.876377                | 3.684078  | 0.635905  |
| 26            | 6             | 0           | 1.801380                | 4.129291  | -0.290185 |
| 27            | 1             | 0           | 3.106395                | 3.523856  | -1.899013 |
| 28            | 1             | 0           | 0.376275                | 4.321770  | 1.353337  |
| 29            | 1             | 0           | 2.064665                | 5.179108  | -0.326914 |
| 30            | 7             | 0           | 0.557734                | 2.373370  | 0.668416  |
| 31            | 6             | 0           | 1.633408                | -1.040515 | -0.133046 |
| 32            | 6             | 0           | 2.719997                | -1.089576 | 0.755921  |
| 33            | 6             | 0           | 1.537066                | -2.007936 | -1.141715 |
| 34            | 6             | 0           | 3.686987                | -2.090362 | 0.638519  |
| 35            | 1             | 0           | 2.816464                | -0.345545 | 1.543650  |
| 36            | 6             | 0           | 2.505956                | -3.011239 | -1.261473 |
| 37            | 1             | 0           | 0.702754                | -1.978453 | -1.837521 |
| 38            | 6             | 0           | 3.582072                | -3.054894 | -0.371319 |
| 39            | 1             | 0           | 4.522449                | -2.116076 | 1.332014  |
| 40            | 1             | 0           | 2.417016                | -3.755340 | -2.047560 |
| 41            | 1             | 0           | 4.334866                | -3.832359 | -0.461768 |
| 42            | 1             | 0           | -0.161103               | -0.107624 | -0.813267 |
| 43            | 1             | 0           | -0.128996               | 1.993447  | 1.334334  |

Cartesian coordinates of the (*S,S*)-**2** species

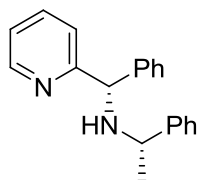

(*S,S*)-**2**

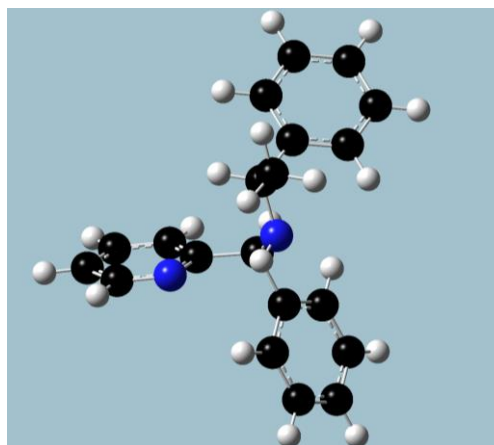

B3LYP/6-31+G(d), gas phase

| Center Number | Atomic Number | Atomic Type | Coordinates (Angstroms) |           |           |
|---------------|---------------|-------------|-------------------------|-----------|-----------|
|               |               |             | X                       | Y         | Z         |
| 1             | 6             | 0           | -0.513175               | -0.111184 | -0.028703 |
| 2             | 1             | 0           | 0.198193                | -0.308135 | -0.838462 |
| 3             | 7             | 0           | 0.238263                | -0.211857 | 1.228394  |
| 4             | 1             | 0           | -0.381525               | 0.053238  | 1.992209  |
| 5             | 6             | 0           | 1.455801                | 0.611660  | 1.296318  |
| 6             | 1             | 0           | 1.259746                | 1.650041  | 0.974912  |
| 7             | 6             | 0           | 1.925068                | 0.665106  | 2.760025  |
| 8             | 1             | 0           | 2.845841                | 1.251243  | 2.847900  |
| 9             | 1             | 0           | 1.160437                | 1.133650  | 3.393137  |
| 10            | 1             | 0           | 2.119923                | -0.344839 | 3.137993  |
| 11            | 6             | 0           | 2.550766                | 0.051164  | 0.394192  |
| 12            | 6             | 0           | 3.364373                | 0.914934  | -0.350754 |
| 13            | 6             | 0           | 2.800013                | -1.328107 | 0.329191  |
| 14            | 6             | 0           | 4.410640                | 0.419565  | -1.135827 |
| 15            | 1             | 0           | 3.176130                | 1.986879  | -0.317830 |
| 16            | 6             | 0           | 3.842283                | -1.827196 | -0.455421 |
| 17            | 1             | 0           | 2.160179                | -2.003523 | 0.890493  |
| 18            | 6             | 0           | 4.653363                | -0.955154 | -1.189897 |
| 19            | 1             | 0           | 5.030154                | 1.106583  | -1.707564 |
| 20            | 1             | 0           | 4.021921                | -2.899210 | -0.494938 |
| 21            | 1             | 0           | 5.463830                | -1.344687 | -1.801107 |
| 22            | 6             | 0           | -1.576281               | -1.209042 | -0.082986 |
| 23            | 6             | 0           | -2.755816               | -1.126443 | 0.671578  |
| 24            | 6             | 0           | -1.365416               | -2.344586 | -0.876641 |
| 25            | 6             | 0           | -3.695327               | -2.160115 | 0.638795  |
| 26            | 1             | 0           | -2.941757               | -0.247566 | 1.283257  |
| 27            | 6             | 0           | -2.305910               | -3.377510 | -0.916196 |
| 28            | 1             | 0           | -0.452562               | -2.424827 | -1.463242 |
| 29            | 6             | 0           | -3.474875               | -3.288931 | -0.155935 |
| 30            | 1             | 0           | -4.603245               | -2.080915 | 1.232067  |
| 31            | 1             | 0           | -2.124070               | -4.249974 | -1.539235 |
| 32            | 1             | 0           | -4.208504               | -4.090792 | -0.183786 |
| 33            | 6             | 0           | -1.123704               | 1.273718  | -0.285381 |
| 34            | 6             | 0           | -1.197133               | 1.800359  | -1.582542 |
| 35            | 6             | 0           | -1.782080               | 3.050299  | -1.777375 |
| 36            | 1             | 0           | -0.799508               | 1.234161  | -2.421128 |
| 37            | 6             | 0           | -2.156344               | 3.140292  | 0.585222  |
| 38            | 6             | 0           | -2.277115               | 3.740859  | -0.668944 |
| 39            | 1             | 0           | -1.847272               | 3.479982  | -2.774003 |
| 40            | 1             | 0           | -2.524615               | 3.644182  | 1.477566  |
| 41            | 1             | 0           | -2.739509               | 4.718650  | -0.769028 |
| 42            | 7             | 0           | -1.593773               | 1.940105  | 0.781388  |

B3LYP/6-31+G(d), CH<sub>2</sub>Cl<sub>2</sub> (PCM-UFF)

| Center Number | Atomic Number | Atomic Type | Coordinates (Angstroms) |           |           |
|---------------|---------------|-------------|-------------------------|-----------|-----------|
|               |               |             | X                       | Y         | Z         |
| 1             | 6             | 0           | -0.509783               | -0.115622 | -0.018260 |
| 2             | 1             | 0           | 0.200587                | -0.316552 | -0.826943 |
| 3             | 7             | 0           | 0.238473                | -0.224198 | 1.243842  |
| 4             | 1             | 0           | -0.378688               | 0.069545  | 2.000191  |
| 5             | 6             | 0           | 1.465099                | 0.592837  | 1.306965  |
| 6             | 1             | 0           | 1.270002                | 1.629929  | 0.984488  |
| 7             | 6             | 0           | 1.939826                | 0.647372  | 2.768579  |
| 8             | 1             | 0           | 2.856461                | 1.240585  | 2.852107  |
| 9             | 1             | 0           | 1.175733                | 1.110256  | 3.406022  |
| 10            | 1             | 0           | 2.143637                | -0.360765 | 3.146992  |
| 11            | 6             | 0           | 2.554823                | 0.031583  | 0.399120  |
| 12            | 6             | 0           | 3.318727                | 0.892768  | -0.400710 |
| 13            | 6             | 0           | 2.853133                | -1.340010 | 0.380677  |
| 14            | 6             | 0           | 4.361419                | 0.402951  | -1.195671 |
| 15            | 1             | 0           | 3.094891                | 1.958066  | -0.403481 |
| 16            | 6             | 0           | 3.891437                | -1.834559 | -0.413215 |
| 17            | 1             | 0           | 2.260085                | -2.019680 | 0.986368  |
| 18            | 6             | 0           | 4.651241                | -0.964405 | -1.204254 |
| 19            | 1             | 0           | 4.940640                | 1.088146  | -1.810008 |
| 20            | 1             | 0           | 4.107666                | -2.900395 | -0.415956 |
| 21            | 1             | 0           | 5.458007                | -1.349936 | -1.822675 |
| 22            | 6             | 0           | -1.583746               | -1.202146 | -0.080117 |
| 23            | 6             | 0           | -2.711306               | -1.166239 | 0.755473  |
| 24            | 6             | 0           | -1.442593               | -2.276515 | -0.969584 |
| 25            | 6             | 0           | -3.666276               | -2.185719 | 0.708597  |
| 26            | 1             | 0           | -2.847258               | -0.334123 | 1.441283  |
| 27            | 6             | 0           | -2.399239               | -3.295748 | -1.023396 |
| 28            | 1             | 0           | -0.574345               | -2.320233 | -1.623705 |
| 29            | 6             | 0           | -3.514560               | -3.254392 | -0.181900 |
| 30            | 1             | 0           | -4.532059               | -2.142667 | 1.365000  |
| 31            | 1             | 0           | -2.270782               | -4.120134 | -1.720565 |
| 32            | 1             | 0           | -4.259558               | -4.045100 | -0.220084 |
| 33            | 6             | 0           | -1.110974               | 1.274237  | -0.273798 |
| 34            | 6             | 0           | -1.168256               | 1.803974  | -1.570173 |
| 35            | 6             | 0           | -1.749411               | 3.056136  | -1.768631 |
| 36            | 1             | 0           | -0.761058               | 1.241081  | -2.406120 |
| 37            | 6             | 0           | -2.150632               | 3.141637  | 0.590744  |
| 38            | 6             | 0           | -2.256180               | 3.744570  | -0.663926 |
| 39            | 1             | 0           | -1.801866               | 3.488325  | -2.764480 |
| 40            | 1             | 0           | -2.528022               | 3.645967  | 1.478575  |
| 41            | 1             | 0           | -2.715778               | 4.723044  | -0.766504 |
| 42            | 7             | 0           | -1.592012               | 1.938253  | 0.790497  |

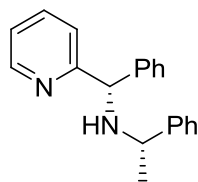

(S,S)-2

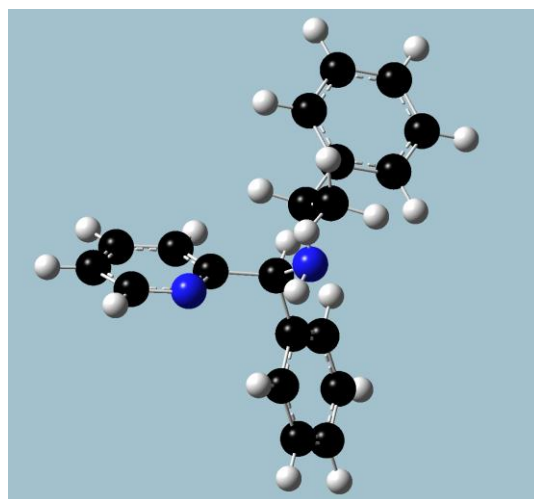

B3LYP/6-31+G(d,p), CH<sub>2</sub>Cl<sub>2</sub> (PCM-UFF)

| Center Number | Atomic Number | Atomic Type | Coordinates (Angstroms) |           |           |
|---------------|---------------|-------------|-------------------------|-----------|-----------|
|               |               |             | X                       | Y         | Z         |
| 1             | 6             | 0           | -0.509351               | -0.115227 | -0.018839 |
| 2             | 1             | 0           | 0.199245                | -0.315319 | -0.828786 |
| 3             | 7             | 0           | 0.238753                | -0.223428 | 1.242666  |
| 4             | 1             | 0           | -0.377752               | 0.066199  | 1.999321  |
| 5             | 6             | 0           | 1.464899                | 0.593130  | 1.307737  |
| 6             | 1             | 0           | 1.271955                | 1.630010  | 0.985066  |
| 7             | 6             | 0           | 1.938267                | 0.646793  | 2.769519  |
| 8             | 1             | 0           | 2.853452                | 1.239874  | 2.854256  |
| 9             | 1             | 0           | 1.173682                | 1.107774  | 3.405603  |
| 10            | 1             | 0           | 2.141998                | -0.360976 | 3.145952  |
| 11            | 6             | 0           | 2.554834                | 0.032659  | 0.399661  |
| 12            | 6             | 0           | 3.323076                | 0.895050  | -0.394480 |
| 13            | 6             | 0           | 2.848172                | -1.339784 | 0.375626  |
| 14            | 6             | 0           | 4.365524                | 0.405180  | -1.189325 |
| 15            | 1             | 0           | 3.102716                | 1.960238  | -0.392661 |
| 16            | 6             | 0           | 3.886115                | -1.834103 | -0.418508 |
| 17            | 1             | 0           | 2.251110                | -2.018984 | 0.976574  |
| 18            | 6             | 0           | 4.650476                | -0.962959 | -1.203653 |
| 19            | 1             | 0           | 4.948076                | 1.090460  | -1.798900 |
| 20            | 1             | 0           | 4.098530                | -2.899819 | -0.426006 |
| 21            | 1             | 0           | 5.456495                | -1.348066 | -1.821810 |
| 22            | 6             | 0           | -1.582665               | -1.202084 | -0.080942 |
| 23            | 6             | 0           | -2.712632               | -1.163167 | 0.751062  |
| 24            | 6             | 0           | -1.437959               | -2.279751 | -0.965631 |
| 25            | 6             | 0           | -3.666649               | -2.183282 | 0.705357  |
| 26            | 1             | 0           | -2.850470               | -0.328523 | 1.432205  |
| 27            | 6             | 0           | -2.393898               | -3.299408 | -1.018144 |
| 28            | 1             | 0           | -0.568446               | -2.325211 | -1.616547 |
| 29            | 6             | 0           | -3.511561               | -3.255242 | -0.180246 |
| 30            | 1             | 0           | -4.533848               | -2.138249 | 1.358359  |
| 31            | 1             | 0           | -2.263259               | -4.125880 | -1.711112 |
| 32            | 1             | 0           | -4.255429               | -4.045891 | -0.217535 |
| 33            | 6             | 0           | -1.111285               | 1.274028  | -0.274441 |
| 34            | 6             | 0           | -1.166744               | 1.804324  | -1.570625 |
| 35            | 6             | 0           | -1.748913               | 3.055645  | -1.769235 |
| 36            | 1             | 0           | -0.757252               | 1.242727  | -2.405204 |
| 37            | 6             | 0           | -2.154903               | 3.139692  | 0.589299  |
| 38            | 6             | 0           | -2.258631               | 3.742672  | -0.665235 |
| 39            | 1             | 0           | -1.799977               | 3.488198  | -2.764134 |
| 40            | 1             | 0           | -2.534865               | 3.643879  | 1.475391  |
| 41            | 1             | 0           | -2.718868               | 4.719890  | -0.768058 |
| 42            | 7             | 0           | -1.595058               | 1.936665  | 0.789375  |

B3LYP/6-31+G(d,p), CH<sub>2</sub>Cl<sub>2</sub> (CPCM-Bondi)

| Center Number | Atomic Number | Atomic Type | Coordinates (Angstroms) |           |           |
|---------------|---------------|-------------|-------------------------|-----------|-----------|
|               |               |             | X                       | Y         | Z         |
| 1             | 6             | 0           | -0.507240               | -0.120367 | 0.002227  |
| 2             | 1             | 0           | 0.197332                | -0.320885 | -0.810184 |
| 3             | 7             | 0           | 0.243163                | -0.247579 | 1.262530  |
| 4             | 1             | 0           | -0.366125               | 0.034842  | 2.028035  |
| 5             | 6             | 0           | 1.476153                | 0.564319  | 1.332190  |
| 6             | 1             | 0           | 1.282925                | 1.603643  | 1.021516  |
| 7             | 6             | 0           | 1.956969                | 0.600005  | 2.791573  |
| 8             | 1             | 0           | 2.870690                | 1.195471  | 2.876969  |
| 9             | 1             | 0           | 1.193390                | 1.050990  | 3.435721  |
| 10            | 1             | 0           | 2.166437                | -0.411133 | 3.156316  |
| 11            | 6             | 0           | 2.556955                | 0.013318  | 0.407538  |
| 12            | 6             | 0           | 3.256662                | 0.874068  | -0.449730 |
| 13            | 6             | 0           | 2.909134                | -1.346128 | 0.424154  |
| 14            | 6             | 0           | 4.287072                | 0.396081  | -1.268401 |
| 15            | 1             | 0           | 2.991842                | 1.928492  | -0.478627 |
| 16            | 6             | 0           | 3.935009                | -1.829035 | -0.392947 |
| 17            | 1             | 0           | 2.373172                | -2.029053 | 1.076820  |
| 18            | 6             | 0           | 4.629439                | -0.959017 | -1.242794 |
| 19            | 1             | 0           | 4.815170                | 1.080364  | -1.926808 |
| 20            | 1             | 0           | 4.193095                | -2.884327 | -0.367081 |
| 21            | 1             | 0           | 5.426114                | -1.335234 | -1.878326 |
| 22            | 6             | 0           | -1.592441               | -1.194752 | -0.073314 |
| 23            | 6             | 0           | -2.691588               | -1.191977 | 0.800916  |
| 24            | 6             | 0           | -1.492513               | -2.222211 | -1.022417 |
| 25            | 6             | 0           | -3.660025               | -2.197677 | 0.731604  |
| 26            | 1             | 0           | -2.795567               | -0.399022 | 1.535718  |
| 27            | 6             | 0           | -2.462753               | -3.227738 | -1.097734 |
| 28            | 1             | 0           | -0.647631               | -2.238526 | -1.706225 |
| 29            | 6             | 0           | -3.549937               | -3.219331 | -0.218894 |
| 30            | 1             | 0           | -4.502461               | -2.180893 | 1.417513  |
| 31            | 1             | 0           | -2.366732               | -4.015183 | -1.840085 |
| 32            | 1             | 0           | -4.304629               | -3.998662 | -0.273613 |
| 33            | 6             | 0           | -1.095705               | 1.275706  | -0.250572 |
| 34            | 6             | 0           | -1.141362               | 1.801516  | -1.549296 |
| 35            | 6             | 0           | -1.713465               | 3.056205  | -1.756582 |
| 36            | 1             | 0           | -0.731625               | 1.232713  | -2.378671 |
| 37            | 6             | 0           | -2.128543               | 3.156455  | 0.599936  |
| 38            | 6             | 0           | -2.222846               | 3.753040  | -0.658087 |
| 39            | 1             | 0           | -1.756724               | 3.484097  | -2.753870 |
| 40            | 1             | 0           | -2.507250               | 3.668727  | 1.481698  |
| 41            | 1             | 0           | -2.675322               | 4.733155  | -0.767419 |
| 42            | 7             | 0           | -1.578869               | 1.948370  | 0.808097  |

Cartesian coordinates of the ammonium-(*S,S*)-2 species

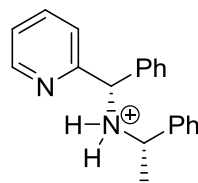

(*S,S*)-Ammonium 2

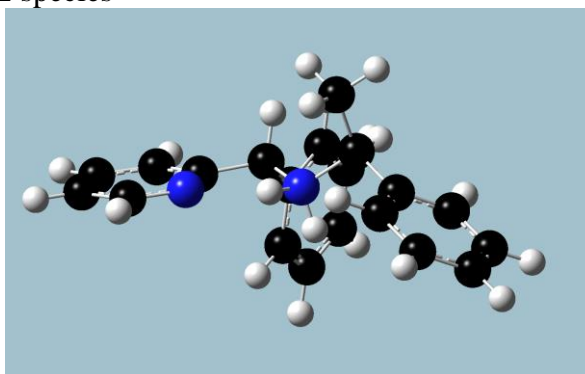

B3LYP/6-31+G(d), gas phase

| Center Number | Atomic Number | Atomic Type | Coordinates (Angstroms) |           |           |
|---------------|---------------|-------------|-------------------------|-----------|-----------|
|               |               |             | X                       | Y         | Z         |
| 1             | 6             | 0           | -1.053611               | -0.004702 | 0.639926  |
| 2             | 1             | 0           | -1.030996               | -0.045130 | 1.732996  |
| 3             | 7             | 0           | 0.339918                | -0.434828 | 0.188376  |
| 4             | 1             | 0           | 0.233425                | -1.446638 | -0.052789 |
| 5             | 6             | 0           | 1.506797                | -0.203707 | 1.158647  |
| 6             | 1             | 0           | 1.360167                | 0.815939  | 1.527769  |
| 7             | 6             | 0           | 1.424092                | -1.198415 | 2.317412  |
| 8             | 1             | 0           | 2.243167                | -0.993288 | 3.012506  |
| 9             | 1             | 0           | 0.486072                | -1.112193 | 2.875602  |
| 10            | 1             | 0           | 1.527473                | -2.233264 | 1.976262  |
| 11            | 6             | 0           | 2.797310                | -0.256379 | 0.362974  |
| 12            | 6             | 0           | 3.516171                | 0.926486  | 0.137640  |
| 13            | 6             | 0           | 3.284480                | -1.463117 | -0.165476 |
| 14            | 6             | 0           | 4.704397                | 0.905614  | -0.597281 |
| 15            | 1             | 0           | 3.154174                | 1.867350  | 0.547136  |
| 16            | 6             | 0           | 4.467171                | -1.482003 | -0.906993 |
| 17            | 1             | 0           | 2.755429                | -2.398119 | 0.006174  |
| 18            | 6             | 0           | 5.179598                | -0.298168 | -1.122451 |
| 19            | 1             | 0           | 5.256692                | 1.827350  | -0.755997 |
| 20            | 1             | 0           | 4.836086                | -2.421348 | -1.308807 |
| 21            | 1             | 0           | 6.103394                | -0.316267 | -1.693533 |
| 22            | 6             | 0           | -1.343371               | 1.416733  | 0.204533  |
| 23            | 6             | 0           | -1.564847               | 1.720648  | -1.149089 |
| 24            | 6             | 0           | -1.371502               | 2.447859  | 1.153035  |
| 25            | 6             | 0           | -1.797053               | 3.038312  | -1.545037 |
| 26            | 1             | 0           | -1.578724               | 0.928256  | -1.895699 |
| 27            | 6             | 0           | -1.612816               | 3.766628  | 0.756409  |
| 28            | 1             | 0           | -1.216669               | 2.222685  | 2.206383  |
| 29            | 6             | 0           | -1.821524               | 4.062879  | -0.592238 |
| 30            | 1             | 0           | -1.970163               | 3.264061  | -2.593330 |
| 31            | 1             | 0           | -1.639424               | 4.557434  | 1.500506  |
| 32            | 1             | 0           | -2.009938               | 5.086971  | -0.901343 |
| 33            | 6             | 0           | -2.034392               | -1.076582 | 0.142189  |
| 34            | 6             | 0           | -3.416262               | -0.877939 | 0.177121  |
| 35            | 6             | 0           | -4.242286               | -1.929189 | -0.222944 |
| 36            | 1             | 0           | -3.833394               | 0.069829  | 0.502639  |
| 37            | 6             | 0           | -2.274936               | -3.230685 | -0.654603 |
| 38            | 6             | 0           | -3.664995               | -3.128244 | -0.647807 |
| 39            | 1             | 0           | -5.321957               | -1.811713 | -0.206063 |
| 40            | 1             | 0           | -1.776693               | -4.139669 | -0.980628 |
| 41            | 1             | 0           | -4.276036               | -3.965329 | -0.969878 |
| 42            | 7             | 0           | -1.476732               | -2.225295 | -0.262176 |
| 43            | 1             | 0           | 0.561083                | 0.047763  | -0.689085 |

B3LYP/6-31+G(d), CH<sub>2</sub>Cl<sub>2</sub> (PCM-UFF)

| Center Number | Atomic Number | Atomic Type | Coordinates (Angstroms) |           |           |
|---------------|---------------|-------------|-------------------------|-----------|-----------|
|               |               |             | X                       | Y         | Z         |
| 1             | 6             | 0           | -1.050070               | -0.017296 | 0.631716  |
| 2             | 1             | 0           | -1.030143               | -0.064056 | 1.723713  |
| 3             | 7             | 0           | 0.328771                | -0.482679 | 0.176444  |
| 4             | 1             | 0           | 0.210209                | -1.496797 | -0.035515 |
| 5             | 6             | 0           | 1.498186                | -0.231495 | 1.135687  |
| 6             | 1             | 0           | 1.352805                | 0.792865  | 1.488496  |
| 7             | 6             | 0           | 1.426895                | -1.202288 | 2.314800  |
| 8             | 1             | 0           | 2.243870                | -0.969612 | 3.003586  |
| 9             | 1             | 0           | 0.488077                | -1.108648 | 2.869243  |
| 10            | 1             | 0           | 1.539457                | -2.242959 | 1.995698  |
| 11            | 6             | 0           | 2.793772                | -0.293689 | 0.346144  |
| 12            | 6             | 0           | 3.521508                | 0.885081  | 0.128483  |
| 13            | 6             | 0           | 3.284000                | -1.503037 | -0.172627 |
| 14            | 6             | 0           | 4.720641                | 0.858450  | -0.589365 |
| 15            | 1             | 0           | 3.153167                | 1.827620  | 0.526712  |
| 16            | 6             | 0           | 4.477707                | -1.528577 | -0.897478 |
| 17            | 1             | 0           | 2.745670                | -2.433526 | -0.011047 |
| 18            | 6             | 0           | 5.199466                | -0.348539 | -1.105716 |
| 19            | 1             | 0           | 5.276844                | 1.778856  | -0.743898 |
| 20            | 1             | 0           | 4.845818                | -2.470687 | -1.294128 |
| 21            | 1             | 0           | 6.130641                | -0.371522 | -1.665134 |
| 22            | 6             | 0           | -1.303301               | 1.414272  | 0.202577  |
| 23            | 6             | 0           | -1.504815               | 1.733189  | -1.150255 |
| 24            | 6             | 0           | -1.321025               | 2.437713  | 1.159242  |
| 25            | 6             | 0           | -1.710240               | 3.058188  | -1.537659 |
| 26            | 1             | 0           | -1.515260               | 0.949314  | -1.904801 |
| 27            | 6             | 0           | -1.534722               | 3.764180  | 0.771195  |
| 28            | 1             | 0           | -1.174345               | 2.200788  | 2.210365  |
| 29            | 6             | 0           | -1.726640               | 4.075989  | -0.576964 |
| 30            | 1             | 0           | -1.865681               | 3.294405  | -2.586504 |
| 31            | 1             | 0           | -1.550553               | 4.549087  | 1.522007  |
| 32            | 1             | 0           | -1.892355               | 5.106205  | -0.879522 |
| 33            | 6             | 0           | -2.067614               | -1.053819 | 0.137031  |
| 34            | 6             | 0           | -3.441004               | -0.798764 | 0.167270  |
| 35            | 6             | 0           | -4.309168               | -1.816597 | -0.228127 |
| 36            | 1             | 0           | -3.819812               | 0.165941  | 0.488612  |
| 37            | 6             | 0           | -2.396261               | -3.201019 | -0.642811 |
| 38            | 6             | 0           | -3.781015               | -3.041809 | -0.643119 |
| 39            | 1             | 0           | -5.382751               | -1.653472 | -0.214988 |
| 40            | 1             | 0           | -1.936171               | -4.133204 | -0.959565 |
| 41            | 1             | 0           | -4.424662               | -3.855201 | -0.962014 |
| 42            | 7             | 0           | -1.557133               | -2.227718 | -0.255294 |
| 43            | 1             | 0           | 0.545914                | -0.033421 | -0.719499 |

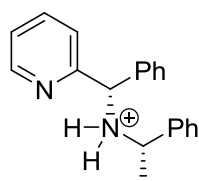

(S,S)-Ammonium **2**

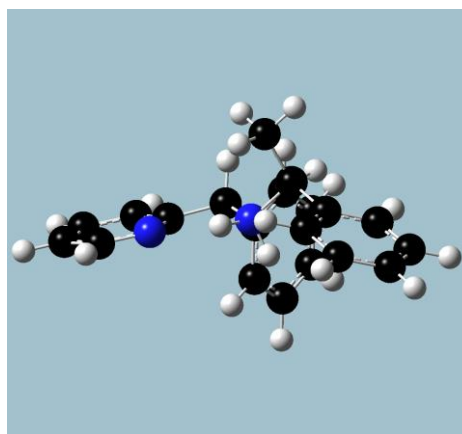

B3LYP/6-31+G(d,p), CH<sub>2</sub>Cl<sub>2</sub> (PCM-UFF)

| Center Number | Atomic Number | Atomic Type | Coordinates (Angstroms) |           |           |
|---------------|---------------|-------------|-------------------------|-----------|-----------|
|               |               |             | X                       | Y         | Z         |
| 1             | 6             | 0           | -1.048685               | -0.014871 | 0.632712  |
| 2             | 1             | 0           | -1.030361               | -0.059828 | 1.724496  |
| 3             | 7             | 0           | 0.331760                | -0.469470 | 0.176195  |
| 4             | 1             | 0           | 0.209507                | -1.483679 | -0.040014 |
| 5             | 6             | 0           | 1.498828                | -0.218647 | 1.136622  |
| 6             | 1             | 0           | 1.353571                | 0.804347  | 1.492390  |
| 7             | 6             | 0           | 1.429257                | -1.192506 | 2.312905  |
| 8             | 1             | 0           | 2.243894                | -0.959481 | 3.002469  |
| 9             | 1             | 0           | 0.490451                | -1.102796 | 2.865880  |
| 10            | 1             | 0           | 1.545034                | -2.230732 | 1.990512  |
| 11            | 6             | 0           | 2.795300                | -0.276083 | 0.348065  |
| 12            | 6             | 0           | 3.520682                | 0.904489  | 0.133438  |
| 13            | 6             | 0           | 3.287909                | -1.483365 | -0.172949 |
| 14            | 6             | 0           | 4.720036                | 0.881473  | -0.583791 |
| 15            | 1             | 0           | 3.150567                | 1.844713  | 0.533349  |
| 16            | 6             | 0           | 4.481752                | -1.505002 | -0.897245 |
| 17            | 1             | 0           | 2.751513                | -2.414472 | -0.013709 |
| 18            | 6             | 0           | 5.201251                | -0.323308 | -1.102436 |
| 19            | 1             | 0           | 5.274327                | 1.802472  | -0.736033 |
| 20            | 1             | 0           | 4.851671                | -2.444767 | -1.295591 |
| 21            | 1             | 0           | 6.132039                | -0.343267 | -1.661068 |
| 22            | 6             | 0           | -1.319398               | 1.412619  | 0.201486  |
| 23            | 6             | 0           | -1.518826               | 1.727229  | -1.152568 |
| 24            | 6             | 0           | -1.356043               | 2.436192  | 1.157196  |
| 25            | 6             | 0           | -1.740776               | 3.048673  | -1.542085 |
| 26            | 1             | 0           | -1.513800               | 0.943129  | -1.905818 |
| 27            | 6             | 0           | -1.586728               | 3.758912  | 0.766739  |
| 28            | 1             | 0           | -1.210771               | 2.202206  | 2.208345  |
| 29            | 6             | 0           | -1.776485               | 4.066663  | -0.582417 |
| 30            | 1             | 0           | -1.894019               | 3.281928  | -2.591088 |
| 31            | 1             | 0           | -1.617315               | 4.543800  | 1.515950  |
| 32            | 1             | 0           | -1.955174               | 5.093421  | -0.886492 |
| 33            | 6             | 0           | -2.053473               | -1.063841 | 0.139520  |
| 34            | 6             | 0           | -3.430363               | -0.830099 | 0.170166  |
| 35            | 6             | 0           | -4.281779               | -1.860995 | -0.226668 |
| 36            | 1             | 0           | -3.823372               | 0.127775  | 0.492301  |
| 37            | 6             | 0           | -2.347759               | -3.215395 | -0.643796 |
| 38            | 6             | 0           | -3.734436               | -3.077069 | -0.643427 |
| 39            | 1             | 0           | -5.357112               | -1.715291 | -0.213551 |
| 40            | 1             | 0           | -1.874416               | -4.139633 | -0.962215 |
| 41            | 1             | 0           | -4.364964               | -3.899245 | -0.963276 |
| 42            | 7             | 0           | -1.524553               | -2.228758 | -0.254801 |
| 43            | 1             | 0           | 0.546695                | -0.013434 | -0.715414 |

B3LYP/6-31+G(d,p), CH<sub>2</sub>Cl<sub>2</sub> (CPCM-Bondi)

| Center Number | Atomic Number | Atomic Type | Coordinates (Angstroms) |           |           |
|---------------|---------------|-------------|-------------------------|-----------|-----------|
|               |               |             | X                       | Y         | Z         |
| 1             | 6             | 0           | -1.026711               | -0.022593 | 0.616544  |
| 2             | 1             | 0           | -1.002007               | -0.064008 | 1.707733  |
| 3             | 7             | 0           | 0.350522                | -0.467201 | 0.151826  |
| 4             | 1             | 0           | 0.243451                | -1.470343 | -0.098640 |
| 5             | 6             | 0           | 1.506807                | -0.250842 | 1.129798  |
| 6             | 1             | 0           | 1.360071                | 0.759118  | 1.518089  |
| 7             | 6             | 0           | 1.427932                | -1.265369 | 2.271501  |
| 8             | 1             | 0           | 2.238508                | -1.059326 | 2.974865  |
| 9             | 1             | 0           | 0.483540                | -1.190293 | 2.817389  |
| 10            | 1             | 0           | 1.539447                | -2.290556 | 1.907938  |
| 11            | 6             | 0           | 2.811370                | -0.284250 | 0.351596  |
| 12            | 6             | 0           | 3.540740                | 0.901855  | 0.183948  |
| 13            | 6             | 0           | 3.307429                | -1.473071 | -0.208035 |
| 14            | 6             | 0           | 4.746770                | 0.902611  | -0.524051 |
| 15            | 1             | 0           | 3.166806                | 1.827868  | 0.612767  |
| 16            | 6             | 0           | 4.508485                | -1.471646 | -0.922076 |
| 17            | 1             | 0           | 2.762401                | -2.405333 | -0.090193 |
| 18            | 6             | 0           | 5.232073                | -0.284403 | -1.080240 |
| 19            | 1             | 0           | 5.302771                | 1.828097  | -0.640637 |
| 20            | 1             | 0           | 4.879904                | -2.397549 | -1.351093 |
| 21            | 1             | 0           | 6.167444                | -0.286079 | -1.631954 |
| 22            | 6             | 0           | -1.312766               | 1.405066  | 0.189595  |
| 23            | 6             | 0           | -1.536654               | 1.723075  | -1.159927 |
| 24            | 6             | 0           | -1.348497               | 2.424906  | 1.149682  |
| 25            | 6             | 0           | -1.782863               | 3.043579  | -1.540720 |
| 26            | 1             | 0           | -1.528100               | 0.940601  | -1.914451 |
| 27            | 6             | 0           | -1.602118               | 3.746927  | 0.768681  |
| 28            | 1             | 0           | -1.183094               | 2.186348  | 2.196829  |
| 29            | 6             | 0           | -1.817440               | 4.058205  | -0.576542 |
| 30            | 1             | 0           | -1.955122               | 3.279006  | -2.586617 |
| 31            | 1             | 0           | -1.630812               | 4.528401  | 1.521951  |
| 32            | 1             | 0           | -2.014652               | 5.083866  | -0.873687 |
| 33            | 6             | 0           | -2.043205               | -1.064895 | 0.136114  |
| 34            | 6             | 0           | -3.418041               | -0.829036 | 0.236029  |
| 35            | 6             | 0           | -4.293562               | -1.842349 | -0.151693 |
| 36            | 1             | 0           | -3.790348               | 0.119655  | 0.606869  |
| 37            | 6             | 0           | -2.388303               | -3.191452 | -0.694841 |
| 38            | 6             | 0           | -3.772665               | -3.048410 | -0.629058 |
| 39            | 1             | 0           | -5.366409               | -1.692056 | -0.083796 |
| 40            | 1             | 0           | -1.936350               | -4.109466 | -1.059940 |
| 41            | 1             | 0           | -4.421102               | -3.858792 | -0.943772 |
| 42            | 7             | 0           | -1.539620               | -2.220480 | -0.315513 |
| 43            | 1             | 0           | 0.574658                | 0.017175  | -0.721668 |

Cartesian coordinates of the pyridinium-(*S,S*)-2 species

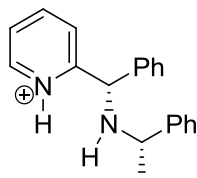

(*S,S*)-Pyridinium 2

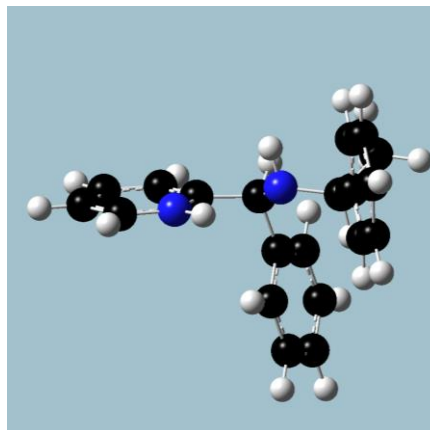

B3LYP/6-31+G(d), gas phase

| Center Number | Atomic Number | Atomic Type | Coordinates (Angstroms) |           |           |
|---------------|---------------|-------------|-------------------------|-----------|-----------|
|               |               |             | X                       | Y         | Z         |
| 1             | 6             | 0           | -0.977285               | 0.054484  | -0.931283 |
| 2             | 1             | 0           | -1.185112               | -0.077525 | -2.003174 |
| 3             | 7             | 0           | 0.444369                | 0.331989  | -0.650305 |
| 4             | 1             | 0           | 0.775694                | 1.018968  | -1.331362 |
| 5             | 6             | 0           | 1.417172                | -0.805435 | -0.671111 |
| 6             | 1             | 0           | 1.054621                | -1.528220 | 0.064113  |
| 7             | 6             | 0           | 1.502355                | -1.502587 | -2.038175 |
| 8             | 1             | 0           | 2.252997                | -2.299023 | -2.008902 |
| 9             | 1             | 0           | 0.544642                | -1.958604 | -2.311894 |
| 10            | 1             | 0           | 1.789218                | -0.805429 | -2.834603 |
| 11            | 6             | 0           | 2.756335                | -0.272351 | -0.179994 |
| 12            | 6             | 0           | 3.205691                | -0.589689 | 1.109187  |
| 13            | 6             | 0           | 3.558231                | 0.550924  | -0.985839 |
| 14            | 6             | 0           | 4.424133                | -0.098156 | 1.585628  |
| 15            | 1             | 0           | 2.603428                | -1.237489 | 1.743245  |
| 16            | 6             | 0           | 4.773361                | 1.051020  | -0.510512 |
| 17            | 1             | 0           | 3.251432                | 0.796091  | -2.000843 |
| 18            | 6             | 0           | 5.209790                | 0.727181  | 0.777199  |
| 19            | 1             | 0           | 4.761142                | -0.364869 | 2.583771  |
| 20            | 1             | 0           | 5.384078                | 1.682430  | -1.150325 |
| 21            | 1             | 0           | 6.159510                | 1.107273  | 1.143233  |
| 22            | 6             | 0           | -1.529972               | -1.171124 | -0.200817 |
| 23            | 6             | 0           | -1.447945               | -1.284475 | 1.195817  |
| 24            | 6             | 0           | -2.162096               | -2.184752 | -0.931871 |
| 25            | 6             | 0           | -1.976682               | -2.400731 | 1.845260  |
| 26            | 1             | 0           | -0.956298               | -0.511452 | 1.781965  |
| 27            | 6             | 0           | -2.695659               | -3.301137 | -0.281089 |
| 28            | 1             | 0           | -2.230086               | -2.111691 | -2.015313 |
| 29            | 6             | 0           | -2.603417               | -3.410970 | 1.107866  |
| 30            | 1             | 0           | -1.900389               | -2.482235 | 2.925926  |
| 31            | 1             | 0           | -3.176907               | -4.083578 | -0.860909 |
| 32            | 1             | 0           | -3.015803               | -4.278618 | 1.614753  |
| 33            | 6             | 0           | -1.764657               | 1.281903  | -0.472611 |
| 34            | 6             | 0           | -3.066515               | 1.609661  | -0.849045 |
| 35            | 6             | 0           | -3.672162               | 2.738626  | -0.301231 |
| 36            | 1             | 0           | -3.592237               | 0.976142  | -1.555855 |
| 37            | 6             | 0           | -1.689731               | 3.185565  | 0.969287  |
| 38            | 6             | 0           | -2.980632               | 3.537378  | 0.624335  |
| 39            | 1             | 0           | -4.684959               | 3.002775  | -0.591251 |
| 40            | 1             | 0           | -1.072087               | 3.741836  | 1.665277  |
| 41            | 1             | 0           | -3.436183               | 4.418268  | 1.062550  |
| 42            | 7             | 0           | -1.136131               | 2.086467  | 0.409260  |
| 43            | 1             | 0           | -0.166267               | 1.773762  | 0.600908  |

B3LYP/6-31+G(d), CH<sub>2</sub>Cl<sub>2</sub> (PCM-UFF)

| Center Number | Atomic Number | Atomic Type | Coordinates (Angstroms) |           |           |
|---------------|---------------|-------------|-------------------------|-----------|-----------|
|               |               |             | X                       | Y         | Z         |
| 1             | 6             | 0           | -0.973708               | -0.071055 | 0.894696  |
| 2             | 1             | 0           | -1.161295               | 0.045150  | 1.971219  |
| 3             | 7             | 0           | 0.432020                | -0.394475 | 0.586954  |
| 4             | 1             | 0           | 0.715595                | -1.170899 | 1.188010  |
| 5             | 6             | 0           | 1.439061                | 0.691725  | 0.749186  |
| 6             | 1             | 0           | 1.117182                | 1.505884  | 0.094462  |
| 7             | 6             | 0           | 1.532001                | 1.238865  | 2.184435  |
| 8             | 1             | 0           | 2.313416                | 2.004089  | 2.247126  |
| 9             | 1             | 0           | 0.587916                | 1.701939  | 2.490524  |
| 10            | 1             | 0           | 1.771852                | 0.449874  | 2.906952  |
| 11            | 6             | 0           | 2.772707                | 0.178545  | 0.218493  |
| 12            | 6             | 0           | 3.238744                | 0.606650  | -1.033166 |
| 13            | 6             | 0           | 3.554918                | -0.731999 | 0.946730  |
| 14            | 6             | 0           | 4.452152                | 0.139717  | -1.547949 |
| 15            | 1             | 0           | 2.648524                | 1.316267  | -1.609166 |
| 16            | 6             | 0           | 4.765977                | -1.206519 | 0.433593  |
| 17            | 1             | 0           | 3.230415                | -1.074060 | 1.926746  |
| 18            | 6             | 0           | 5.219282                | -0.771416 | -0.815862 |
| 19            | 1             | 0           | 4.797612                | 0.489373  | -2.517547 |
| 20            | 1             | 0           | 5.357741                | -1.910216 | 1.013518  |
| 21            | 1             | 0           | 6.163652                | -1.135178 | -1.212248 |
| 22            | 6             | 0           | -1.462912               | 1.201578  | 0.196927  |
| 23            | 6             | 0           | -1.336892               | 1.362752  | -1.191514 |
| 24            | 6             | 0           | -2.074924               | 2.212922  | 0.947719  |
| 25            | 6             | 0           | -1.806861               | 2.520731  | -1.813755 |
| 26            | 1             | 0           | -0.859818               | 0.591048  | -1.789982 |
| 27            | 6             | 0           | -2.549558               | 3.371904  | 0.324758  |
| 28            | 1             | 0           | -2.178028               | 2.100723  | 2.024509  |
| 29            | 6             | 0           | -2.416262               | 3.528196  | -1.057000 |
| 30            | 1             | 0           | -1.698512               | 2.635864  | -2.888820 |
| 31            | 1             | 0           | -3.018389               | 4.149968  | 0.920942  |
| 32            | 1             | 0           | -2.783131               | 4.428253  | -1.542698 |
| 33            | 6             | 0           | -1.825781               | -1.247668 | 0.427599  |
| 34            | 6             | 0           | -3.106822               | -1.544145 | 0.885597  |
| 35            | 6             | 0           | -3.799139               | -2.620320 | 0.331858  |
| 36            | 1             | 0           | -3.551486               | -0.933064 | 1.663480  |
| 37            | 6             | 0           | -1.934293               | -3.080991 | -1.098494 |
| 38            | 6             | 0           | -3.211626               | -3.397728 | -0.676229 |
| 39            | 1             | 0           | -4.797529               | -2.857745 | 0.685418  |
| 40            | 1             | 0           | -1.390655               | -3.624884 | -1.860996 |
| 41            | 1             | 0           | -3.732747               | -4.237515 | -1.120209 |
| 42            | 7             | 0           | -1.296672               | -2.032047 | -0.534752 |
| 43            | 1             | 0           | -0.336134               | -1.779700 | -0.802383 |



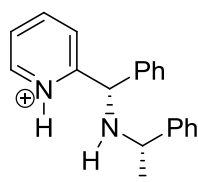

(S,S)-Pyridinium 2

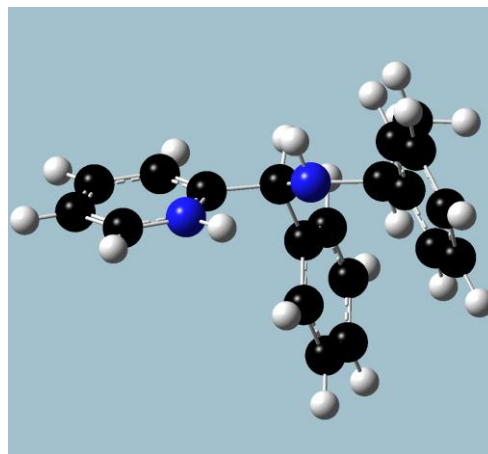

B3LYP/6-31+G(d,p), CH<sub>2</sub>Cl<sub>2</sub> (PCM-UFF)

| Center Number | Atomic Number | Atomic Type | Coordinates (Angstroms) |           |           |
|---------------|---------------|-------------|-------------------------|-----------|-----------|
|               |               |             | X                       | Y         | Z         |
| 1             | 6             | 0           | -0.974487               | -0.072139 | 0.896695  |
| 2             | 1             | 0           | -1.166100               | 0.044208  | 1.971948  |
| 3             | 7             | 0           | 0.431601                | -0.394698 | 0.591535  |
| 4             | 1             | 0           | 0.716131                | -1.168905 | 1.192605  |
| 5             | 6             | 0           | 1.437992                | 0.692395  | 0.748777  |
| 6             | 1             | 0           | 1.116311                | 1.504566  | 0.092151  |
| 7             | 6             | 0           | 1.532967                | 1.243803  | 2.182041  |
| 8             | 1             | 0           | 2.309641                | 2.012553  | 2.239411  |
| 9             | 1             | 0           | 0.588542                | 1.702180  | 2.490038  |
| 10            | 1             | 0           | 1.779818                | 0.458378  | 2.904462  |
| 11            | 6             | 0           | 2.770979                | 0.178649  | 0.217595  |
| 12            | 6             | 0           | 3.236973                | 0.606235  | -1.034077 |
| 13            | 6             | 0           | 3.552309                | -0.732327 | 0.946054  |
| 14            | 6             | 0           | 4.449866                | 0.138240  | -1.548572 |
| 15            | 1             | 0           | 2.647715                | 1.315873  | -1.609481 |
| 16            | 6             | 0           | 4.762633                | -1.207909 | 0.432851  |
| 17            | 1             | 0           | 3.227798                | -1.073618 | 1.925468  |
| 18            | 6             | 0           | 5.216066                | -0.773346 | -0.816520 |
| 19            | 1             | 0           | 4.795452                | 0.487101  | -2.517495 |
| 20            | 1             | 0           | 5.353514                | -1.911553 | 1.012204  |
| 21            | 1             | 0           | 6.159347                | -1.137714 | -1.212666 |
| 22            | 6             | 0           | -1.462832               | 1.200626  | 0.198495  |
| 23            | 6             | 0           | -1.335713               | 1.361553  | -1.189804 |
| 24            | 6             | 0           | -2.074473               | 2.212135  | 0.949070  |
| 25            | 6             | 0           | -1.804386               | 2.519835  | -1.811990 |
| 26            | 1             | 0           | -0.859269               | 0.590154  | -1.787742 |
| 27            | 6             | 0           | -2.547718               | 3.371305  | 0.325847  |
| 28            | 1             | 0           | -2.178263               | 2.099752  | 2.024959  |
| 29            | 6             | 0           | -2.413333               | 3.527539  | -1.055575 |
| 30            | 1             | 0           | -1.695467               | 2.635053  | -2.886163 |
| 31            | 1             | 0           | -3.016077               | 4.149192  | 0.921151  |
| 32            | 1             | 0           | -2.778916               | 4.427265  | -1.541052 |
| 33            | 6             | 0           | -1.825521               | -1.247967 | 0.427572  |
| 34            | 6             | 0           | -3.107040               | -1.544253 | 0.884263  |
| 35            | 6             | 0           | -3.798392               | -2.619756 | 0.328960  |
| 36            | 1             | 0           | -3.551834               | -0.934048 | 1.661735  |
| 37            | 6             | 0           | -1.932042               | -3.079412 | -1.099386 |
| 38            | 6             | 0           | -3.209668               | -3.396187 | -0.678964 |
| 39            | 1             | 0           | -4.796594               | -2.857531 | 0.680865  |
| 40            | 1             | 0           | -1.388928               | -3.623381 | -1.861428 |
| 41            | 1             | 0           | -3.729833               | -4.235068 | -1.124002 |
| 42            | 7             | 0           | -1.294888               | -2.031250 | -0.534052 |
| 43            | 1             | 0           | -0.335051               | -1.776935 | -0.799347 |

B3LYP/6-31+G(d,p), CH<sub>2</sub>Cl<sub>2</sub> (CPCM-Bondi)

| Center Number | Atomic Number | Atomic Type | Coordinates (Angstroms) |           |           |
|---------------|---------------|-------------|-------------------------|-----------|-----------|
|               |               |             | X                       | Y         | Z         |
| 1             | 6             | 0           | -0.978255               | -0.081906 | 0.852135  |
| 2             | 1             | 0           | -1.169006               | 0.018213  | 1.928934  |
| 3             | 7             | 0           | 0.415935                | -0.447935 | 0.545965  |
| 4             | 1             | 0           | 0.643686                | -1.281356 | 1.089190  |
| 5             | 6             | 0           | 1.455500                | 0.577125  | 0.836614  |
| 6             | 1             | 0           | 1.167171                | 1.475291  | 0.284513  |
| 7             | 6             | 0           | 1.562873                | 0.941733  | 2.328195  |
| 8             | 1             | 0           | 2.348183                | 1.689635  | 2.478126  |
| 9             | 1             | 0           | 0.623216                | 1.363508  | 2.698183  |
| 10            | 1             | 0           | 1.806980                | 0.063694  | 2.936095  |
| 11            | 6             | 0           | 2.779865                | 0.095701  | 0.255362  |
| 12            | 6             | 0           | 3.331814                | 0.740617  | -0.861218 |
| 13            | 6             | 0           | 3.472262                | -0.994957 | 0.807218  |
| 14            | 6             | 0           | 4.542297                | 0.310726  | -1.416215 |
| 15            | 1             | 0           | 2.811069                | 1.588876  | -1.298762 |
| 16            | 6             | 0           | 4.678722                | -1.432295 | 0.252025  |
| 17            | 1             | 0           | 3.076224                | -1.510880 | 1.678006  |
| 18            | 6             | 0           | 5.218981                | -0.780016 | -0.861894 |
| 19            | 1             | 0           | 4.953702                | 0.827458  | -2.278767 |
| 20            | 1             | 0           | 5.198548                | -2.278643 | 0.692257  |
| 21            | 1             | 0           | 6.158450                | -1.116850 | -1.290520 |
| 22            | 6             | 0           | -1.409564               | 1.229661  | 0.188796  |
| 23            | 6             | 0           | -1.261143               | 1.433360  | -1.192009 |
| 24            | 6             | 0           | -1.989232               | 2.238505  | 0.968492  |
| 25            | 6             | 0           | -1.680112               | 2.630008  | -1.778029 |
| 26            | 1             | 0           | -0.810436               | 0.663552  | -1.811483 |
| 27            | 6             | 0           | -2.412679               | 3.436192  | 0.381787  |
| 28            | 1             | 0           | -2.105560               | 2.091031  | 2.038830  |
| 29            | 6             | 0           | -2.258969               | 3.634455  | -0.992976 |
| 30            | 1             | 0           | -1.556545               | 2.777621  | -2.846912 |
| 31            | 1             | 0           | -2.857348               | 4.210864  | 0.999495  |
| 32            | 1             | 0           | -2.585841               | 4.563407  | -1.450741 |
| 33            | 6             | 0           | -1.879583               | -1.210205 | 0.366319  |
| 34            | 6             | 0           | -3.167797               | -1.448347 | 0.839403  |
| 35            | 6             | 0           | -3.918364               | -2.487939 | 0.293403  |
| 36            | 1             | 0           | -3.567023               | -0.818795 | 1.625909  |
| 37            | 6             | 0           | -2.096191               | -3.028492 | -1.162567 |
| 38            | 6             | 0           | -3.380609               | -3.288837 | -0.723713 |
| 39            | 1             | 0           | -4.921190               | -2.679159 | 0.660449  |
| 40            | 1             | 0           | -1.589168               | -3.593678 | -1.933900 |
| 41            | 1             | 0           | -3.944651               | -4.102529 | -1.162433 |
| 42            | 7             | 0           | -1.401296               | -2.013278 | -0.605750 |
| 43            | 1             | 0           | -0.441835               | -1.813296 | -0.904732 |

Cartesian coordinates of the TS for the proton transfer of the protonated (*R,S*)-2 species

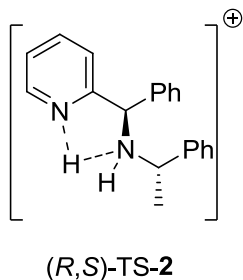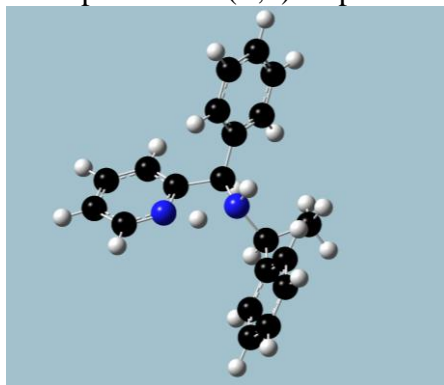

B3LYP/6-31+G(d), gas phase

| Center Number | Atomic Number | Atomic Type | Coordinates (Angstroms) |           |           |
|---------------|---------------|-------------|-------------------------|-----------|-----------|
|               |               |             | X                       | Y         | Z         |
| 1             | 6             | 0           | 1.026559                | 0.011712  | -0.672514 |
| 2             | 7             | 0           | -0.329249               | -0.294881 | -0.111891 |
| 3             | 1             | 0           | -0.249082               | -0.965632 | 0.653300  |
| 4             | 6             | 0           | -1.401699               | -0.737415 | -1.073667 |
| 5             | 1             | 0           | -1.381377               | 0.003728  | -1.881458 |
| 6             | 6             | 0           | -1.114549               | -2.124697 | -1.660249 |
| 7             | 1             | 0           | -1.900662               | -2.392358 | -2.373067 |
| 8             | 1             | 0           | -0.155740               | -2.150953 | -2.189133 |
| 9             | 1             | 0           | -1.093412               | -2.894888 | -0.881686 |
| 10            | 6             | 0           | -2.747105               | -0.634819 | -0.372582 |
| 11            | 6             | 0           | -3.673474               | 0.337642  | -0.773495 |
| 12            | 6             | 0           | -3.085069               | -1.496060 | 0.683302  |
| 13            | 6             | 0           | -4.912044               | 0.450131  | -0.135134 |
| 14            | 1             | 0           | -3.434381               | 1.003641  | -1.600546 |
| 15            | 6             | 0           | -4.318000               | -1.379659 | 1.328462  |
| 16            | 1             | 0           | -2.396079               | -2.275587 | 1.003028  |
| 17            | 6             | 0           | -5.234731               | -0.406079 | 0.919971  |
| 18            | 1             | 0           | -5.623470               | 1.201854  | -0.465749 |
| 19            | 1             | 0           | -4.566481               | -2.055195 | 2.142269  |
| 20            | 1             | 0           | -6.197237               | -0.321954 | 1.416545  |
| 21            | 6             | 0           | 1.225767                | 1.509316  | -0.360439 |
| 22            | 6             | 0           | 2.322644                | 2.307408  | -0.671146 |
| 23            | 6             | 0           | 2.278850                | 3.651695  | -0.295581 |
| 24            | 1             | 0           | 3.184642                | 1.889912  | -1.181471 |
| 25            | 6             | 0           | 0.101623                | 3.306947  | 0.661714  |
| 26            | 6             | 0           | 1.160055                | 4.160871  | 0.379376  |
| 27            | 1             | 0           | 3.116271                | 4.304633  | -0.523818 |
| 28            | 1             | 0           | -0.797059               | 3.622806  | 1.181289  |
| 29            | 1             | 0           | 1.112738                | 5.201678  | 0.681217  |
| 30            | 7             | 0           | 0.167707                | 2.019748  | 0.282136  |
| 31            | 6             | 0           | 2.137892                | -0.865721 | -0.123638 |
| 32            | 6             | 0           | 2.844119                | -1.720316 | -0.979766 |
| 33            | 6             | 0           | 2.463997                | -0.840190 | 1.242163  |
| 34            | 6             | 0           | 3.857146                | -2.543499 | -0.479989 |
| 35            | 1             | 0           | 2.604903                | -1.746752 | -2.040774 |
| 36            | 6             | 0           | 3.470225                | -1.668413 | 1.742109  |
| 37            | 1             | 0           | 1.941683                | -0.168810 | 1.922007  |
| 38            | 6             | 0           | 4.168937                | -2.521051 | 0.881237  |
| 39            | 1             | 0           | 4.398324                | -3.201255 | -1.154050 |
| 40            | 1             | 0           | 3.713717                | -1.642635 | 2.800451  |
| 41            | 1             | 0           | 4.954770                | -3.161783 | 1.270683  |
| 42            | 1             | 0           | 0.986564                | -0.105874 | -1.760425 |
| 43            | 1             | 0           | -0.514696               | 0.994525  | 0.348870  |

Imaginary frequency of  $-1198.8841 \text{ cm}^{-1}$

B3LYP/6-31+G(d), CH<sub>2</sub>Cl<sub>2</sub> (PCM-UFF)

| Center Number | Atomic Number | Atomic Type | Coordinates (Angstroms) |           |           |
|---------------|---------------|-------------|-------------------------|-----------|-----------|
|               |               |             | X                       | Y         | Z         |
| 1             | 6             | 0           | 1.027813                | 0.012105  | -0.670697 |
| 2             | 7             | 0           | -0.325403               | -0.302112 | -0.103064 |
| 3             | 1             | 0           | -0.244710               | -0.970485 | 0.664176  |
| 4             | 6             | 0           | -1.394470               | -0.737156 | -1.066490 |
| 5             | 1             | 0           | -1.373978               | 0.005610  | -1.871105 |
| 6             | 6             | 0           | -1.111661               | -2.122850 | -1.659058 |
| 7             | 1             | 0           | -1.898547               | -2.383399 | -2.374021 |
| 8             | 1             | 0           | -0.154060               | -2.142068 | -2.189196 |
| 9             | 1             | 0           | -1.088167               | -2.895456 | -0.883339 |
| 10            | 6             | 0           | -2.742785               | -0.639168 | -0.367438 |
| 11            | 6             | 0           | -3.667872               | 0.335890  | -0.765833 |
| 12            | 6             | 0           | -3.084734               | -1.505018 | 0.683648  |
| 13            | 6             | 0           | -4.909226               | 0.446059  | -0.131080 |
| 14            | 1             | 0           | -3.419372               | 1.011792  | -1.581263 |
| 15            | 6             | 0           | -4.320791               | -1.391798 | 1.325155  |
| 16            | 1             | 0           | -2.392734               | -2.279182 | 1.007647  |
| 17            | 6             | 0           | -5.237305               | -0.416160 | 0.918598  |
| 18            | 1             | 0           | -5.616219               | 1.204477  | -0.456732 |
| 19            | 1             | 0           | -4.569241               | -2.068817 | 2.138104  |
| 20            | 1             | 0           | -6.200430               | -0.331898 | 1.414745  |
| 21            | 6             | 0           | 1.217622                | 1.510442  | -0.361184 |
| 22            | 6             | 0           | 2.302068                | 2.315668  | -0.693692 |
| 23            | 6             | 0           | 2.251286                | 3.660442  | -0.321157 |
| 24            | 1             | 0           | 3.156861                | 1.907424  | -1.222246 |
| 25            | 6             | 0           | 0.093312                | 3.295902  | 0.671909  |
| 26            | 6             | 0           | 1.139173                | 4.159596  | 0.370582  |
| 27            | 1             | 0           | 3.077599                | 4.320482  | -0.566643 |
| 28            | 1             | 0           | -0.799375               | 3.605562  | 1.204195  |
| 29            | 1             | 0           | 1.085675                | 5.200355  | 0.670027  |
| 30            | 7             | 0           | 0.164703                | 2.009258  | 0.295805  |
| 31            | 6             | 0           | 2.143106                | -0.861046 | -0.120943 |
| 32            | 6             | 0           | 2.820257                | -1.746555 | -0.969634 |
| 33            | 6             | 0           | 2.504129                | -0.800997 | 1.234766  |
| 34            | 6             | 0           | 3.837883                | -2.566421 | -0.472765 |
| 35            | 1             | 0           | 2.554949                | -1.797598 | -2.022844 |
| 36            | 6             | 0           | 3.515713                | -1.625175 | 1.732374  |
| 37            | 1             | 0           | 2.003878                | -0.108216 | 1.908319  |
| 38            | 6             | 0           | 4.185338                | -2.509324 | 0.879513  |
| 39            | 1             | 0           | 4.355527                | -3.247392 | -1.142631 |
| 40            | 1             | 0           | 3.785217                | -1.571154 | 2.783489  |
| 41            | 1             | 0           | 4.975398                | -3.146452 | 1.267196  |
| 42            | 1             | 0           | 0.985241                | -0.107613 | -1.757177 |
| 43            | 1             | 0           | -0.511736               | 0.957396  | 0.360680  |

Imaginary frequency of  $-1321.4278 \text{ cm}^{-1}$

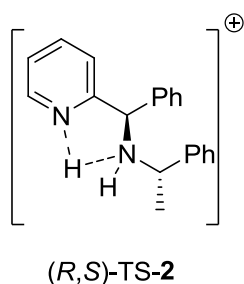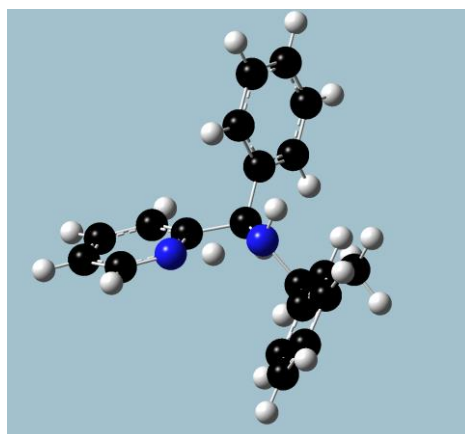

B3LYP/6-31+G(d,p), CH<sub>2</sub>Cl<sub>2</sub> (PCM-UFF)

| Center Number | Atomic Number | Atomic Type | Coordinates (Angstroms) |           |           |
|---------------|---------------|-------------|-------------------------|-----------|-----------|
|               |               |             | X                       | Y         | Z         |
| 1             | 6             | 0           | 1.027826                | 0.012695  | -0.669361 |
| 2             | 7             | 0           | -0.325167               | -0.301929 | -0.101120 |
| 3             | 1             | 0           | -0.242735               | -0.974775 | 0.660734  |
| 4             | 6             | 0           | -1.393842               | -0.735976 | -1.066334 |
| 5             | 1             | 0           | -1.375166               | 0.007706  | -1.869537 |
| 6             | 6             | 0           | -1.110453               | -2.120168 | -1.661313 |
| 7             | 1             | 0           | -1.895649               | -2.378337 | -2.377168 |
| 8             | 1             | 0           | -0.153142               | -2.138467 | -2.189626 |
| 9             | 1             | 0           | -1.088636               | -2.893468 | -0.887633 |
| 10            | 6             | 0           | -2.742411               | -0.639264 | -0.367728 |
| 11            | 6             | 0           | -3.664603               | 0.340672  | -0.760349 |
| 12            | 6             | 0           | -3.086724               | -1.510905 | 0.677628  |
| 13            | 6             | 0           | -4.905653               | 0.449866  | -0.125323 |
| 14            | 1             | 0           | -3.414207               | 1.020256  | -1.571053 |
| 15            | 6             | 0           | -4.322472               | -1.398385 | 1.319362  |
| 16            | 1             | 0           | -2.397303               | -2.288281 | 0.996630  |
| 17            | 6             | 0           | -5.236135               | -0.417980 | 0.918654  |
| 18            | 1             | 0           | -5.610250               | 1.211418  | -0.446082 |
| 19            | 1             | 0           | -4.572937               | -2.079233 | 2.127398  |
| 20            | 1             | 0           | -6.198471               | -0.334413 | 1.414660  |
| 21            | 6             | 0           | 1.216748                | 1.510004  | -0.360102 |
| 22            | 6             | 0           | 2.301786                | 2.314917  | -0.691574 |
| 23            | 6             | 0           | 2.250016                | 3.659485  | -0.319982 |
| 24            | 1             | 0           | 3.156673                | 1.906236  | -1.218048 |
| 25            | 6             | 0           | 0.090640                | 3.295364  | 0.669734  |
| 26            | 6             | 0           | 1.136698                | 4.158636  | 0.369518  |
| 27            | 1             | 0           | 3.075925                | 4.319368  | -0.564235 |
| 28            | 1             | 0           | -0.801830               | 3.606623  | 1.200352  |
| 29            | 1             | 0           | 1.082438                | 5.198800  | 0.668156  |
| 30            | 7             | 0           | 0.162336                | 2.008200  | 0.294614  |
| 31            | 6             | 0           | 2.143705                | -0.860014 | -0.120160 |
| 32            | 6             | 0           | 2.819913                | -1.745728 | -0.969162 |
| 33            | 6             | 0           | 2.505246                | -0.799854 | 1.235333  |
| 34            | 6             | 0           | 3.837415                | -2.565642 | -0.472717 |
| 35            | 1             | 0           | 2.554162                | -1.796594 | -2.021452 |
| 36            | 6             | 0           | 3.516628                | -1.624318 | 1.732256  |
| 37            | 1             | 0           | 2.005874                | -0.107658 | 1.908797  |
| 38            | 6             | 0           | 4.185445                | -2.508510 | 0.879172  |
| 39            | 1             | 0           | 4.354310                | -3.246335 | -1.142137 |
| 40            | 1             | 0           | 3.786550                | -1.570625 | 2.782451  |
| 41            | 1             | 0           | 4.974894                | -3.145415 | 1.266219  |
| 42            | 1             | 0           | 0.987103                | -0.106243 | -1.755681 |
| 43            | 1             | 0           | -0.506430               | 0.956164  | 0.357488  |

Imaginary frequency of -1228.0484 cm<sup>-1</sup>

B3LYP/6-31+G(d,p), CH<sub>2</sub>Cl<sub>2</sub> (CPCM-Bondi)

| Center Number | Atomic Number | Atomic Type | Coordinates (Angstroms) |           |           |
|---------------|---------------|-------------|-------------------------|-----------|-----------|
|               |               |             | X                       | Y         | Z         |
| 1             | 6             | 0           | 1.021065                | 0.016235  | -0.657893 |
| 2             | 7             | 0           | -0.334206               | -0.275668 | -0.091535 |
| 3             | 1             | 0           | -0.264194               | -0.946741 | 0.673245  |
| 4             | 6             | 0           | -1.398327               | -0.694033 | -1.063132 |
| 5             | 1             | 0           | -1.379055               | 0.061621  | -1.854131 |
| 6             | 6             | 0           | -1.115757               | -2.069770 | -1.679314 |
| 7             | 1             | 0           | -1.899834               | -2.316751 | -2.401175 |
| 8             | 1             | 0           | -0.156158               | -2.076495 | -2.204204 |
| 9             | 1             | 0           | -1.094547               | -2.851649 | -0.913889 |
| 10            | 6             | 0           | -2.751467               | -0.609661 | -0.370146 |
| 11            | 6             | 0           | -3.670431               | 0.379287  | -0.749795 |
| 12            | 6             | 0           | -3.107043               | -1.503364 | 0.653513  |
| 13            | 6             | 0           | -4.918320               | 0.476001  | -0.124530 |
| 14            | 1             | 0           | -3.410692               | 1.076305  | -1.542599 |
| 15            | 6             | 0           | -4.349960               | -1.404347 | 1.285241  |
| 16            | 1             | 0           | -2.417229               | -2.284176 | 0.962283  |
| 17            | 6             | 0           | -5.260251               | -0.414760 | 0.897121  |
| 18            | 1             | 0           | -5.619069               | 1.245565  | -0.435232 |
| 19            | 1             | 0           | -4.608727               | -2.102289 | 2.076275  |
| 20            | 1             | 0           | -6.227614               | -0.341499 | 1.385348  |
| 21            | 6             | 0           | 1.242936                | 1.506833  | -0.343786 |
| 22            | 6             | 0           | 2.343175                | 2.292271  | -0.674344 |
| 23            | 6             | 0           | 2.316811                | 3.637059  | -0.300488 |
| 24            | 1             | 0           | 3.188390                | 1.867093  | -1.203686 |
| 25            | 6             | 0           | 0.149405                | 3.312534  | 0.686848  |
| 26            | 6             | 0           | 1.211977                | 4.156648  | 0.388752  |
| 27            | 1             | 0           | 3.154858                | 4.282036  | -0.544058 |
| 28            | 1             | 0           | -0.738164               | 3.639986  | 1.216118  |
| 29            | 1             | 0           | 1.176599                | 5.197617  | 0.688181  |
| 30            | 7             | 0           | 0.198601                | 2.024672  | 0.311005  |
| 31            | 6             | 0           | 2.121780                | -0.880732 | -0.116174 |
| 32            | 6             | 0           | 2.826377                | -1.723923 | -0.985450 |
| 33            | 6             | 0           | 2.445740                | -0.881815 | 1.250369  |
| 34            | 6             | 0           | 3.836575                | -2.560380 | -0.499199 |
| 35            | 1             | 0           | 2.584600                | -1.728663 | -2.044668 |
| 36            | 6             | 0           | 3.449819                | -1.722119 | 1.737268  |
| 37            | 1             | 0           | 1.916654                | -0.226898 | 1.938409  |
| 38            | 6             | 0           | 4.148864                | -2.562683 | 0.863251  |
| 39            | 1             | 0           | 4.375208                | -3.208128 | -1.184452 |
| 40            | 1             | 0           | 3.689953                | -1.715946 | 2.796317  |
| 41            | 1             | 0           | 4.932134                | -3.212200 | 1.242417  |
| 42            | 1             | 0           | 0.980558                | -0.094234 | -1.744646 |
| 43            | 1             | 0           | -0.492253               | 0.996731  | 0.369193  |

Imaginary frequency of -1248.8151 cm<sup>-1</sup>

Cartesian coordinates of the TS for the proton transfer of the protonated (*S,S*)-2 species

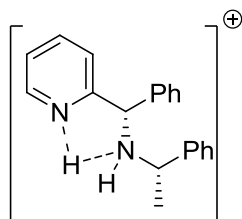

(*S,S*)-TS-2

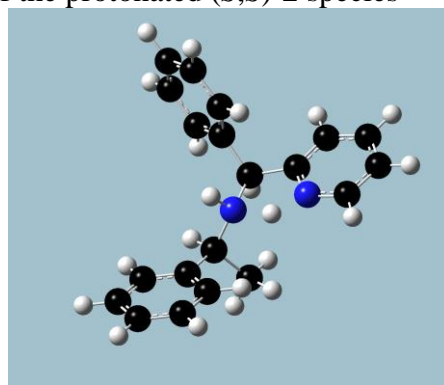

B3LYP/6-31+G(d), gas phase

| Center Number | Atomic Number | Atomic Type | Coordinates (Angstroms) |           |           |
|---------------|---------------|-------------|-------------------------|-----------|-----------|
|               |               |             | X                       | Y         | Z         |
| 1             | 6             | 0           | -1.020409               | 0.065488  | 0.673039  |
| 2             | 1             | 0           | -0.973327               | 0.082208  | 1.766693  |
| 3             | 7             | 0           | 0.359319                | -0.224294 | 0.153765  |
| 4             | 1             | 0           | -0.012737               | -1.461922 | -0.337344 |
| 5             | 6             | 0           | 1.495084                | -0.157600 | 1.146837  |
| 6             | 1             | 0           | 1.364780                | 0.766938  | 1.724105  |
| 7             | 6             | 0           | 1.441869                | -1.351741 | 2.105956  |
| 8             | 1             | 0           | 2.238789                | -1.253551 | 2.848933  |
| 9             | 1             | 0           | 0.490689                | -1.404670 | 2.648882  |
| 10            | 1             | 0           | 1.592339                | -2.300241 | 1.580134  |
| 11            | 6             | 0           | 2.802325                | -0.049777 | 0.380055  |
| 12            | 6             | 0           | 3.567016                | 1.121139  | 0.471878  |
| 13            | 6             | 0           | 3.264654                | -1.098935 | -0.430341 |
| 14            | 6             | 0           | 4.772479                | 1.242425  | -0.225347 |
| 15            | 1             | 0           | 3.224379                | 1.942390  | 1.098102  |
| 16            | 6             | 0           | 4.464660                | -0.977031 | -1.133120 |
| 17            | 1             | 0           | 2.696212                | -2.023048 | -0.510721 |
| 18            | 6             | 0           | 5.222073                | 0.194151  | -1.030771 |
| 19            | 1             | 0           | 5.356838                | 2.154011  | -0.137631 |
| 20            | 1             | 0           | 4.812395                | -1.797720 | -1.754472 |
| 21            | 1             | 0           | 6.158607                | 0.285789  | -1.573506 |
| 22            | 6             | 0           | -1.585364               | 1.388052  | 0.188806  |
| 23            | 6             | 0           | -1.921336               | 1.576762  | -1.161870 |
| 24            | 6             | 0           | -1.745527               | 2.449771  | 1.089127  |
| 25            | 6             | 0           | -2.396181               | 2.812464  | -1.603793 |
| 26            | 1             | 0           | -1.820199               | 0.760178  | -1.874961 |
| 27            | 6             | 0           | -2.226921               | 3.685210  | 0.646708  |
| 28            | 1             | 0           | -1.496178               | 2.314306  | 2.139466  |
| 29            | 6             | 0           | -2.549888               | 3.868605  | -0.699594 |
| 30            | 1             | 0           | -2.652492               | 2.948857  | -2.650553 |
| 31            | 1             | 0           | -2.348709               | 4.500631  | 1.353900  |
| 32            | 1             | 0           | -2.923570               | 4.828581  | -1.043959 |
| 33            | 6             | 0           | -1.848371               | -1.160817 | 0.252555  |
| 34            | 6             | 0           | -3.204979               | -1.388543 | 0.463160  |
| 35            | 6             | 0           | -3.742880               | -2.595066 | 0.010411  |
| 36            | 1             | 0           | -3.820233               | -0.644244 | 0.958310  |
| 37            | 6             | 0           | -1.582405               | -3.236494 | -0.823785 |
| 38            | 6             | 0           | -2.927514               | -3.531046 | -0.641681 |
| 39            | 1             | 0           | -4.797341               | -2.807706 | 0.160653  |
| 40            | 1             | 0           | -0.889623               | -3.907353 | -1.321258 |
| 41            | 1             | 0           | -3.330633               | -4.470955 | -1.003194 |
| 42            | 7             | 0           | -1.088959               | -2.071204 | -0.371635 |
| 43            | 1             | 0           | 0.567183                | 0.413915  | -0.615865 |

Imaginary frequency of  $-1226.9355 \text{ cm}^{-1}$

B3LYP/6-31+G(d), CH<sub>2</sub>Cl<sub>2</sub> (PCM-UFF)

| Center Number | Atomic Number | Atomic Type | Coordinates (Angstroms) |           |           |
|---------------|---------------|-------------|-------------------------|-----------|-----------|
|               |               |             | X                       | Y         | Z         |
| 1             | 6             | 0           | -1.024581               | 0.064332  | 0.667376  |
| 2             | 1             | 0           | -0.977125               | 0.087826  | 1.759818  |
| 3             | 7             | 0           | 0.359498                | -0.213155 | 0.148649  |
| 4             | 1             | 0           | 0.020346                | -1.436374 | -0.315488 |
| 5             | 6             | 0           | 1.492668                | -0.115046 | 1.135970  |
| 6             | 1             | 0           | 1.358956                | 0.817626  | 1.697084  |
| 7             | 6             | 0           | 1.457347                | -1.293040 | 2.116501  |
| 8             | 1             | 0           | 2.257885                | -1.171273 | 2.852347  |
| 9             | 1             | 0           | 0.509691                | -1.340569 | 2.663909  |
| 10            | 1             | 0           | 1.609609                | -2.248612 | 1.604411  |
| 11            | 6             | 0           | 2.801207                | -0.018462 | 0.367738  |
| 12            | 6             | 0           | 3.595176                | 1.130626  | 0.485211  |
| 13            | 6             | 0           | 3.239247                | -1.061970 | -0.463448 |
| 14            | 6             | 0           | 4.806492                | 1.235879  | -0.206126 |
| 15            | 1             | 0           | 3.267260                | 1.948138  | 1.123443  |
| 16            | 6             | 0           | 4.444763                | -0.955928 | -1.161079 |
| 17            | 1             | 0           | 2.643444                | -1.965460 | -0.568780 |
| 18            | 6             | 0           | 5.232999                | 0.193027  | -1.032590 |
| 19            | 1             | 0           | 5.411690                | 2.132200  | -0.099940 |
| 20            | 1             | 0           | 4.770205                | -1.771473 | -1.801435 |
| 21            | 1             | 0           | 6.172458                | 0.272940  | -1.572880 |
| 22            | 6             | 0           | -1.603138               | 1.380106  | 0.178212  |
| 23            | 6             | 0           | -1.972938               | 1.557529  | -1.165053 |
| 24            | 6             | 0           | -1.750711               | 2.448005  | 1.074029  |
| 25            | 6             | 0           | -2.467197               | 2.787649  | -1.603802 |
| 26            | 1             | 0           | -1.883522               | 0.738507  | -1.875594 |
| 27            | 6             | 0           | -2.250407               | 3.677839  | 0.635272  |
| 28            | 1             | 0           | -1.477415               | 2.319370  | 2.118558  |
| 29            | 6             | 0           | -2.607095               | 3.850445  | -0.704650 |
| 30            | 1             | 0           | -2.749655               | 2.913011  | -2.645390 |
| 31            | 1             | 0           | -2.361073               | 4.496627  | 1.340808  |
| 32            | 1             | 0           | -2.996253               | 4.805393  | -1.046920 |
| 33            | 6             | 0           | -1.835015               | -1.175213 | 0.253553  |
| 34            | 6             | 0           | -3.189568               | -1.412570 | 0.461591  |
| 35            | 6             | 0           | -3.710892               | -2.630785 | 0.020870  |
| 36            | 1             | 0           | -3.814586               | -0.670854 | 0.947491  |
| 37            | 6             | 0           | -1.536620               | -3.258354 | -0.789204 |
| 38            | 6             | 0           | -2.880419               | -3.565272 | -0.612394 |
| 39            | 1             | 0           | -4.763433               | -2.853085 | 0.167211  |
| 40            | 1             | 0           | -0.833088               | -3.928482 | -1.270989 |
| 41            | 1             | 0           | -3.270062               | -4.514215 | -0.963802 |
| 42            | 7             | 0           | -1.059242               | -2.082510 | -0.351838 |
| 43            | 1             | 0           | 0.554972                | 0.405636  | -0.639413 |

Imaginary frequency of  $-1329.9769 \text{ cm}^{-1}$

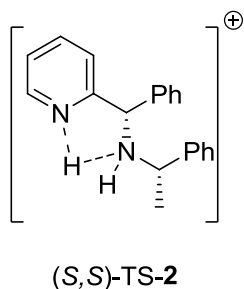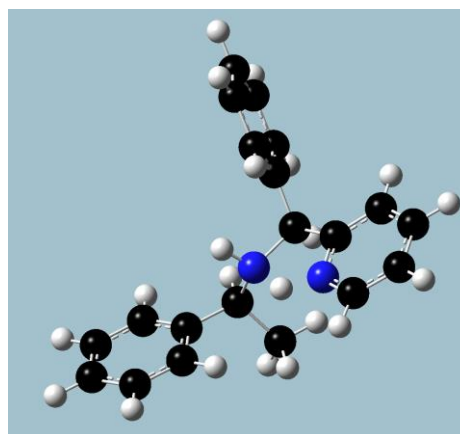

B3LYP/6-31+G(d,p), CH<sub>2</sub>Cl<sub>2</sub> (PCM-UFF)

| Center Number | Atomic Number | Atomic Type | Coordinates (Angstroms) |           |           |
|---------------|---------------|-------------|-------------------------|-----------|-----------|
|               |               |             | X                       | Y         | Z         |
| 1             | 6             | 0           | -1.026338               | 0.061322  | 0.666644  |
| 2             | 1             | 0           | -0.984025               | 0.081960  | 1.759081  |
| 3             | 7             | 0           | 0.359064                | -0.215564 | 0.151228  |
| 4             | 1             | 0           | 0.019056                | -1.438122 | -0.303287 |
| 5             | 6             | 0           | 1.491426                | -0.107473 | 1.139165  |
| 6             | 1             | 0           | 1.357954                | 0.829748  | 1.691529  |
| 7             | 6             | 0           | 1.456829                | -1.276448 | 2.129952  |
| 8             | 1             | 0           | 2.257980                | -1.149101 | 2.862381  |
| 9             | 1             | 0           | 0.511204                | -1.317457 | 2.679065  |
| 10            | 1             | 0           | 1.606802                | -2.235587 | 1.626061  |
| 11            | 6             | 0           | 2.799520                | -0.015381 | 0.369594  |
| 12            | 6             | 0           | 3.583653                | 1.142405  | 0.464053  |
| 13            | 6             | 0           | 3.244912                | -1.070648 | -0.442447 |
| 14            | 6             | 0           | 4.792801                | 1.244622  | -0.231106 |
| 15            | 1             | 0           | 3.249879                | 1.968297  | 1.086942  |
| 16            | 6             | 0           | 4.448238                | -0.967528 | -1.143791 |
| 17            | 1             | 0           | 2.657177                | -1.980309 | -0.529885 |
| 18            | 6             | 0           | 5.226724                | 0.190126  | -1.038300 |
| 19            | 1             | 0           | 5.390294                | 2.147067  | -0.143005 |
| 20            | 1             | 0           | 4.779536                | -1.791538 | -1.768747 |
| 21            | 1             | 0           | 6.163976                | 0.267689  | -1.581124 |
| 22            | 6             | 0           | -1.603948               | 1.377916  | 0.179070  |
| 23            | 6             | 0           | -1.972666               | 1.556881  | -1.164229 |
| 24            | 6             | 0           | -1.750251               | 2.445090  | 1.075744  |
| 25            | 6             | 0           | -2.464763               | 2.787940  | -1.602013 |
| 26            | 1             | 0           | -1.884042               | 0.739069  | -1.875027 |
| 27            | 6             | 0           | -2.247770               | 3.675816  | 0.637647  |
| 28            | 1             | 0           | -1.478035               | 2.315010  | 2.119555  |
| 29            | 6             | 0           | -2.603435               | 3.849969  | -0.702110 |
| 30            | 1             | 0           | -2.746292               | 2.914731  | -2.642845 |
| 31            | 1             | 0           | -2.357615               | 4.493724  | 1.343093  |
| 32            | 1             | 0           | -2.990628               | 4.805106  | -1.043534 |
| 33            | 6             | 0           | -1.834297               | -1.177240 | 0.249231  |
| 34            | 6             | 0           | -3.190937               | -1.411827 | 0.446544  |
| 35            | 6             | 0           | -3.709370               | -2.631217 | 0.006918  |
| 36            | 1             | 0           | -3.818460               | -0.667273 | 0.923037  |
| 37            | 6             | 0           | -1.529081               | -3.264605 | -0.781614 |
| 38            | 6             | 0           | -2.874314               | -3.569231 | -0.614638 |
| 39            | 1             | 0           | -4.762676               | -2.851903 | 0.144872  |
| 40            | 1             | 0           | -0.823831               | -3.938255 | -1.254681 |
| 41            | 1             | 0           | -3.261437               | -4.518781 | -0.964853 |
| 42            | 7             | 0           | -1.053656               | -2.087322 | -0.345326 |
| 43            | 1             | 0           | 0.553727                | 0.403186  | -0.635819 |

Imaginary frequency of -1237.2372 cm<sup>-1</sup>

B3LYP/6-31+G(d,p), CH<sub>2</sub>Cl<sub>2</sub> (CPCM-Bondi)

| Center Number | Atomic Number | Atomic Type | Coordinates (Angstroms) |           |           |
|---------------|---------------|-------------|-------------------------|-----------|-----------|
|               |               |             | X                       | Y         | Z         |
| 1             | 6             | 0           | -1.027591               | 0.061313  | 0.662916  |
| 2             | 1             | 0           | -0.987726               | 0.087254  | 1.754829  |
| 3             | 7             | 0           | 0.353250                | -0.217463 | 0.147302  |
| 4             | 1             | 0           | 0.015051                | -1.455363 | -0.292797 |
| 5             | 6             | 0           | 1.482333                | -0.077399 | 1.127070  |
| 6             | 1             | 0           | 1.346237                | 0.871827  | 1.657357  |
| 7             | 6             | 0           | 1.461533                | -1.224521 | 2.144954  |
| 8             | 1             | 0           | 2.262018                | -1.072668 | 2.874118  |
| 9             | 1             | 0           | 0.514539                | -1.263047 | 2.692041  |
| 10            | 1             | 0           | 1.619973                | -2.189956 | 1.655441  |
| 11            | 6             | 0           | 2.793157                | -0.001770 | 0.360170  |
| 12            | 6             | 0           | 3.620499                | 1.121027  | 0.501569  |
| 13            | 6             | 0           | 3.206026                | -1.044491 | -0.485615 |
| 14            | 6             | 0           | 4.839568                | 1.201632  | -0.180605 |
| 15            | 1             | 0           | 3.311254                | 1.936427  | 1.150502  |
| 16            | 6             | 0           | 4.419240                | -0.962737 | -1.174152 |
| 17            | 1             | 0           | 2.581825                | -1.925187 | -0.609064 |
| 18            | 6             | 0           | 5.241083                | 0.160099  | -1.021932 |
| 19            | 1             | 0           | 5.469638                | 2.077631  | -0.056646 |
| 20            | 1             | 0           | 4.724275                | -1.776017 | -1.826401 |
| 21            | 1             | 0           | 6.185264                | 0.221273  | -1.555142 |
| 22            | 6             | 0           | -1.603462               | 1.376888  | 0.171019  |
| 23            | 6             | 0           | -1.917777               | 1.569380  | -1.184224 |
| 24            | 6             | 0           | -1.802556               | 2.429202  | 1.074855  |
| 25            | 6             | 0           | -2.412375               | 2.798443  | -1.626315 |
| 26            | 1             | 0           | -1.778427               | 0.761205  | -1.897856 |
| 27            | 6             | 0           | -2.302460               | 3.658751  | 0.632919  |
| 28            | 1             | 0           | -1.567758               | 2.287330  | 2.126241  |
| 29            | 6             | 0           | -2.606590               | 3.846117  | -0.718375 |
| 30            | 1             | 0           | -2.651359               | 2.936097  | -2.676649 |
| 31            | 1             | 0           | -2.453177               | 4.465678  | 1.343853  |
| 32            | 1             | 0           | -2.994840               | 4.800000  | -1.062778 |
| 33            | 6             | 0           | -1.837017               | -1.177815 | 0.251373  |
| 34            | 6             | 0           | -3.194206               | -1.412736 | 0.448258  |
| 35            | 6             | 0           | -3.711824               | -2.634854 | 0.014795  |
| 36            | 1             | 0           | -3.822115               | -0.666368 | 0.921437  |
| 37            | 6             | 0           | -1.529467               | -3.272695 | -0.765314 |
| 38            | 6             | 0           | -2.875399               | -3.576634 | -0.600249 |
| 39            | 1             | 0           | -4.765305               | -2.855291 | 0.153280  |
| 40            | 1             | 0           | -0.822301               | -3.949256 | -1.231620 |
| 41            | 1             | 0           | -3.261490               | -4.528676 | -0.945438 |
| 42            | 7             | 0           | -1.056091               | -2.092338 | -0.335498 |
| 43            | 1             | 0           | 0.538013                | 0.382521  | -0.656046 |

Imaginary frequency of -1282.3279 cm<sup>-1</sup>

## Relaxed scans of protonated (*R,S*) and (*S,S*)-**2** species

Level of theory : B3LYP/6-31+G(d) in CH<sub>2</sub>Cl<sub>2</sub> solution, with PCM–UFF model

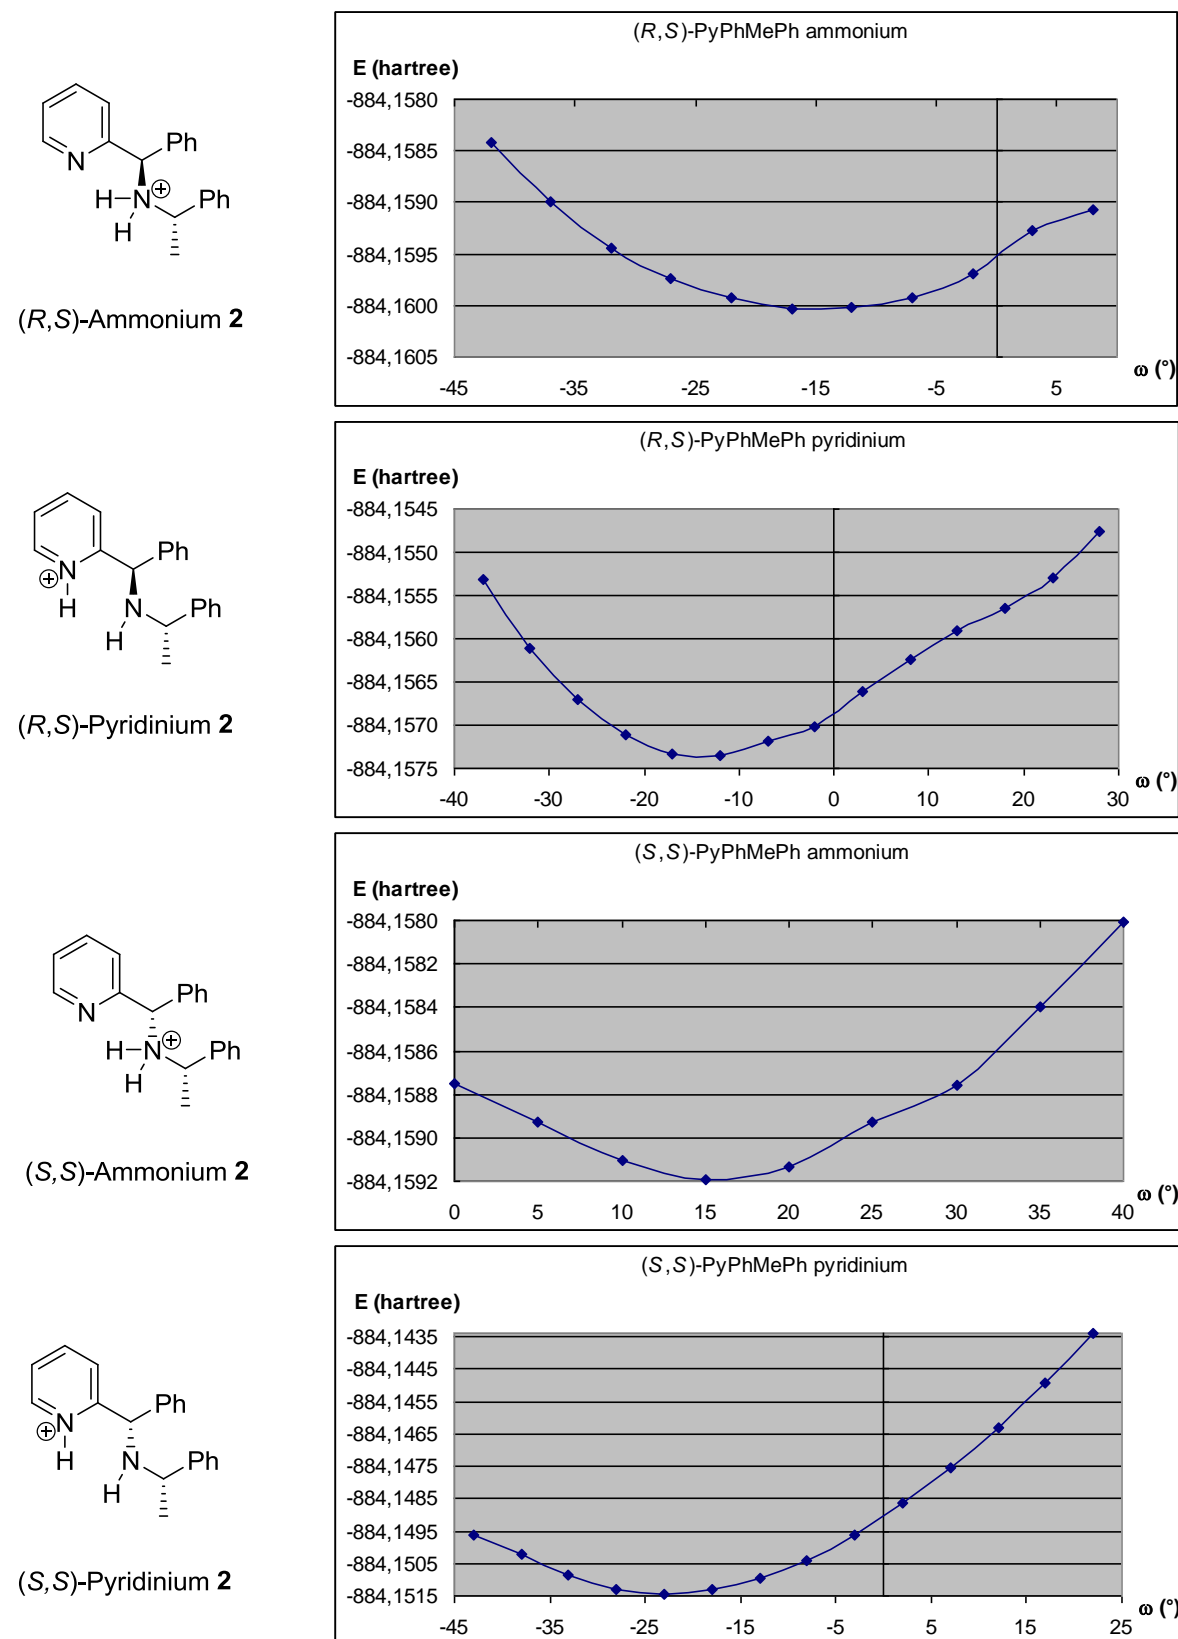

$$E = E_{\text{electronic}} + ZPE + E_{\text{translation}} + E_{\text{vibration}} + E_{\text{rotation}}$$

$$H = E + RT$$

$$G = H - TS$$

Tables of results in energies in hartrees

| Species            | B3LYP/6-31+G(d) gas phase; T = 298.15 K; P = 1 atm |                         |             |             |             |                  |                           |
|--------------------|----------------------------------------------------|-------------------------|-------------|-------------|-------------|------------------|---------------------------|
|                    | $E_{\text{elec}}$                                  | $E_{\text{elec}} + ZPE$ | E           | H           | G           | $\Delta G / H^+$ | $\Delta G^\ddagger / H^+$ |
| (R,S)-1            | -691.962827562                                     | -691.662621             | -691.647136 | -691.646192 | -691.707234 |                  |                           |
| Ammonium (R,S)-1   | -692.357340532                                     | -692.042108             | -692.026622 | -692.025678 | -692.086692 | -0.369458        |                           |
| Pyridinium (R,S)-1 | -692.353475974                                     | -692.039019             | -692.023615 | -692.022671 | -692.083254 | -0.366020        |                           |
| (S,S)-1            | -691.965618080                                     | -691.665302             | -691.649803 | -691.648859 | -691.710054 |                  |                           |
| Ammonium (S,S)-1   | -692.357474480                                     | -692.042077             | -692.026598 | -692.025654 | -692.086785 | -0.366731        |                           |
| Pyridinium (S,S)-1 | -692.346060150                                     | -692.031484             | -692.016134 | -692.015190 | -692.075463 | -0.355409        |                           |
| TS (R,S)-1         | -692.344691252                                     | -692.034463             | -692.019304 | -692.018360 | -692.078413 | -0.361179        | 0.0048                    |
| TS (S,S)-1         | -692.344266485                                     | -692.033904             | -692.018771 | -692.017827 | -692.078000 | -0.357946        | -0.0025                   |
| H <sup>+</sup>     | 0.000000000                                        | 0.000000                | 0.001416    | 0.002360    | -0.010000   |                  |                           |

| Species            | B3LYP/6-31+G(d) CH <sub>2</sub> Cl <sub>2</sub> solution (PCM-UFF); T = 298.15 K; P = 1 atm |                         |             |             |             |                  |                           |
|--------------------|---------------------------------------------------------------------------------------------|-------------------------|-------------|-------------|-------------|------------------|---------------------------|
|                    | $E_{\text{elec}}$                                                                           | $E_{\text{elec}} + ZPE$ | E           | H           | G           | $\Delta G / H^+$ | $\Delta G^\ddagger / H^+$ |
| (R,S)-1            | -691.969216036                                                                              | -691.669153             | -691.653638 | -691.652693 | -691.713912 |                  |                           |
| Ammonium (R,S)-1   | -692.418242759                                                                              | -692.102405             | -692.087040 | -692.086096 | -692.146760 | -0.274824        |                           |
| Pyridinium (R,S)-1 | -692.415283167                                                                              | -692.100710             | -692.085350 | -692.084406 | -692.144484 | -0.272548        |                           |
| (S,S)-1            | -691.971598617                                                                              | -691.671519             | -691.655984 | -691.655040 | -691.716485 |                  |                           |
| Ammonium (S,S)-1   | -692.417616851                                                                              | -692.101646             | -692.086343 | -692.085399 | -692.145563 | -0.271054        |                           |
| Pyridinium (S,S)-1 | -692.409940179                                                                              | -692.095179             | -692.079771 | -692.078827 | -692.139110 | -0.264601        |                           |
| TS (R,S)-1         | -692.404733204                                                                              | -692.094321             | -692.079220 | -692.078276 | -692.137943 | -0.266007        | 0.0065                    |
| TS (S,S)-1         | -692.404425797                                                                              | -692.093533             | -692.078587 | -692.077643 | -692.136610 | -0.262101        | 0.0025                    |
| H <sup>+</sup>     | -0.148024583                                                                                | -0.148025               | -0.146608   | -0.145664   | -0.158024   |                  |                           |

| Species            | B3LYP/6-31+G(d,p) CH <sub>2</sub> Cl <sub>2</sub> solution (PCM-UFF); T = 298.15 K; P = 1 atm |                         |             |             |             |                  |                           |
|--------------------|-----------------------------------------------------------------------------------------------|-------------------------|-------------|-------------|-------------|------------------|---------------------------|
|                    | $E_{\text{elec}}$                                                                             | $E_{\text{elec}} + ZPE$ | E           | H           | G           | $\Delta G / H^+$ | $\Delta G^\ddagger / H^+$ |
| (R,S)-1            | -691.997055421                                                                                | -691.697749             | -691.682209 | -691.681265 | -691.742493 |                  |                           |
| Ammonium (R,S)-1   | -692.448434464                                                                                | -692.133560             | -692.118169 | -692.117225 | -692.177859 | -0.277342        |                           |
| Pyridinium (R,S)-1 | -692.446454069                                                                                | -692.132709             | -692.117318 | -692.116373 | -692.176525 | -0.276008        |                           |
| (S,S)-1            | -691.999376542                                                                                | -691.700056             | -691.684491 | -691.683547 | -691.745053 |                  |                           |
| Ammonium (S,S)-1   | -692.447785517                                                                                | -692.132819             | -692.117486 | -692.116542 | -692.176797 | -0.273720        |                           |
| Pyridinium (S,S)-1 | -692.440980542                                                                                | -692.127068             | -692.111613 | -692.110669 | -692.171119 | -0.268042        |                           |
| TS (R,S)-1         | -692.437481927                                                                                | -692.127810             | -692.112681 | -692.111737 | -692.171518 | -0.271001        | 0.0050                    |
| TS (S,S)-1         | -692.437141746                                                                                | -692.126988             | -692.112024 | -692.111080 | -692.170049 | -0.266972        | 0.0011                    |
| H <sup>+</sup>     | -0.148024583                                                                                  | -0.148025               | -0.146608   | -0.145664   | -0.158024   |                  |                           |

| Species            | B3LYP/6-31+G(d,p) CH <sub>2</sub> Cl <sub>2</sub> solution (CPCM-Bondi); T = 298.15 K; P = 1 atm |                         |             |             |             |                  |                           |
|--------------------|--------------------------------------------------------------------------------------------------|-------------------------|-------------|-------------|-------------|------------------|---------------------------|
|                    | $E_{\text{elec}}$                                                                                | $E_{\text{elec}} + ZPE$ | E           | H           | G           | $\Delta G / H^+$ | $\Delta G^\ddagger / H^+$ |
| (R,S)-1            | -692.003489131                                                                                   | -691.704353             | -691.688809 | -691.687865 | -691.749330 |                  |                           |
| Ammonium (R,S)-1   | -692.463240281                                                                                   | -692.148834             | -692.133276 | -692.132332 | -692.193729 | -0.256400        |                           |
| Pyridinium (R,S)-1 | -692.458470763                                                                                   | -692.145487             | -692.129919 | -692.128975 | -692.190025 | -0.252696        |                           |
| (S,S)-1            | -692.005773456                                                                                   | -691.706682             | -691.691107 | -691.690163 | -691.751724 |                  |                           |
| Ammonium (S,S)-1   | -692.462628287                                                                                   | -692.148011             | -692.132487 | -692.131543 | -692.193068 | -0.253345        |                           |
| Pyridinium (S,S)-1 | -692.453839241                                                                                   | -692.140170             | -692.124684 | -692.123740 | -692.184405 | -0.244682        |                           |
| TS (R,S)-1         | -692.449435890                                                                                   | -692.140096             | -692.124949 | -692.124005 | -692.183991 | -0.246662        | 0.0060                    |
| TS (S,S)-1         | -692.448942216                                                                                   | -692.139369             | -692.124298 | -692.123353 | -692.183040 | -0.243317        | 0.0014                    |
| H <sup>+</sup>     | -0.177999562                                                                                     | -0.178000               | -0.176583   | -0.175639   | -0.187999   |                  |                           |

| Species            | B3LYP/6-31+G(d) gas phase; T = 298.15 K; P = 1 atm |                  |             |             |             |                  |                           |
|--------------------|----------------------------------------------------|------------------|-------------|-------------|-------------|------------------|---------------------------|
|                    | $E_{elec}$                                         | $E_{elec} + ZPE$ | E           | H           | G           | $\Delta G / H^+$ | $\Delta G^\ddagger / H^+$ |
| (R,S)-2            | -883.705545687                                     | -883.352520      | -883.333825 | -883.332880 | -883.402264 |                  |                           |
| Ammonium (R,S)-2   | -884.102923858                                     | -883.734949      | -883.716236 | -883.715292 | -883.785103 | -0.372839        |                           |
| Pyridinium (R,S)-2 | -884.097096131                                     | -883.730042      | -883.711398 | -883.710454 | -883.779608 | -0.367344        |                           |
| (S,S)-2            | -883.705047081                                     | -883.352040      | -883.333296 | -883.332352 | -883.402191 |                  |                           |
| Ammonium (S,S)-2   | -884.102496250                                     | -883.734442      | -883.715725 | -883.714781 | -883.784361 | -0.372170        |                           |
| Pyridinium (S,S)-2 | -884.089225745                                     | -883.722113      | -883.703452 | -883.702508 | -883.771353 | -0.359162        |                           |
| TS (R,S)-2         | -884.088276350                                     | -883.725282      | -883.706888 | -883.705944 | -883.774866 | -0.362602        | 0.0047                    |
| TS (S,S)-2         | -884.088145638                                     | -883.725154      | -883.706738 | -883.705794 | -883.775025 | -0.362834        | -0.0037                   |
| H <sup>+</sup>     | 0.000000000                                        | 0.000000         | 0.001416    | 0.002360    | -0.010000   |                  |                           |

| Species            | B3LYP/6-31+G(d) CH <sub>2</sub> Cl <sub>2</sub> solution (PCM-UFF); T = 298.15 K; P = 1 atm |                  |             |             |             |                  |                           |
|--------------------|---------------------------------------------------------------------------------------------|------------------|-------------|-------------|-------------|------------------|---------------------------|
|                    | $E_{elec}$                                                                                  | $E_{elec} + ZPE$ | E           | H           | G           | $\Delta G / H^+$ | $\Delta G^\ddagger / H^+$ |
| (R,S)-2            | -883.713058804                                                                              | -883.360182      | -883.341450 | -883.340506 | -883.410314 |                  |                           |
| Ammonium (R,S)-2   | -884.160035947                                                                              | -883.791640      | -883.773074 | -883.772130 | -883.840443 | -0.272105        |                           |
| Pyridinium (R,S)-2 | -884.157354065                                                                              | -883.789939      | -883.771407 | -883.770463 | -883.838781 | -0.270443        |                           |
| (S,S)-2            | -883.712745305                                                                              | -883.359874      | -883.341086 | -883.340141 | -883.410454 |                  |                           |
| Ammonium (S,S)-2   | -884.159196824                                                                              | -883.790568      | -883.772015 | -883.771071 | -883.839264 | -0.270786        |                           |
| Pyridinium (S,S)-2 | -884.151442152                                                                              | -883.783915      | -883.765292 | -883.764348 | -883.832789 | -0.264311        |                           |
| TS (R,S)-2         | -884.145489080                                                                              | -883.782425      | -883.764027 | -883.763082 | -883.832061 | -0.263723        | 0.0067                    |
| TS (S,S)-2         | -884.14552257                                                                               | -883.782602      | -883.764203 | -883.763259 | -883.832042 | -0.263564        | 0.0007                    |
| H <sup>+</sup>     | -0.148024583                                                                                | -0.148025        | -0.146608   | -0.145664   | -0.158024   |                  |                           |

| Species            | B3LYP/6-31+G(d,p) CH <sub>2</sub> Cl <sub>2</sub> solution (PCM-UFF); T = 298.15 K; P = 1 atm |                  |             |             |             |                  |                           |
|--------------------|-----------------------------------------------------------------------------------------------|------------------|-------------|-------------|-------------|------------------|---------------------------|
|                    | $E_{elec}$                                                                                    | $E_{elec} + ZPE$ | E           | H           | G           | $\Delta G / H^+$ | $\Delta G^\ddagger / H^+$ |
| (R,S)-2            | -883.744782965                                                                                | -883.392668      | -883.373889 | -883.372944 | -883.443164 |                  |                           |
| Ammonium (R,S)-2   | -884.193983893                                                                                | -883.826321      | -883.807784 | -883.806840 | -883.875040 | -0.273852        |                           |
| Pyridinium (R,S)-2 | -884.192285081                                                                                | -883.825652      | -883.807088 | -883.806144 | -883.874527 | -0.273339        |                           |
| (S,S)-2            | -883.744386233                                                                                | -883.392242      | -883.373421 | -883.372477 | -883.442904 |                  |                           |
| Ammonium (S,S)-2   | -884.193106377                                                                                | -883.825499      | -883.806880 | -883.805936 | -883.874542 | -0.273614        |                           |
| Pyridinium (S,S)-2 | -884.186300410                                                                                | -883.819562      | -883.800901 | -883.799957 | -883.868512 | -0.267584        |                           |
| TS (R,S)-2         | -884.181995282                                                                                | -883.819664      | -883.801230 | -883.800286 | -883.869604 | -0.268416        | 0.0049                    |
| TS (S,S)-2         | -884.182012086                                                                                | -883.819796      | -883.801365 | -883.800421 | -883.869272 | -0.268344        | -0.0008                   |
| H <sup>+</sup>     | -0.148024583                                                                                  | -0.148025        | -0.146608   | -0.145664   | -0.158024   |                  |                           |

| Species            | B3LYP/6-31+G(d,p) CH <sub>2</sub> Cl <sub>2</sub> solution (CPCM-Bondi); T = 298.15 K; P = 1 atm |                  |             |             |             |                  |                           |
|--------------------|--------------------------------------------------------------------------------------------------|------------------|-------------|-------------|-------------|------------------|---------------------------|
|                    | $E_{elec}$                                                                                       | $E_{elec} + ZPE$ | E           | H           | G           | $\Delta G / H^+$ | $\Delta G^\ddagger / H^+$ |
| (R,S)-2            | -883.752209939                                                                                   | -883.400246      | -883.381441 | -883.380497 | -883.450767 |                  |                           |
| Ammonium (R,S)-2   | -884.209783900                                                                                   | -883.842658      | -883.823903 | -883.822959 | -883.893354 | -0.254588        |                           |
| Pyridinium (R,S)-2 | -884.205753756                                                                                   | -883.839882      | -883.821128 | -883.820183 | -883.889635 | -0.250869        |                           |
| (S,S)-2            | -883.751974156                                                                                   | -883.400004      | -883.381203 | -883.380259 | -883.450286 |                  |                           |
| Ammonium (S,S)-2   | -884.209028494                                                                                   | -883.841707      | -883.822977 | -883.822033 | -883.891529 | -0.253244        |                           |
| Pyridinium (S,S)-2 | -884.200973257                                                                                   | -883.834346      | -883.815643 | -883.814699 | -883.883604 | -0.245319        |                           |
| TS (R,S)-2         | -884.195632935                                                                                   | -883.833330      | -883.814987 | -883.814043 | -883.882790 | -0.244024        | 0.0068                    |
| TS (S,S)-2         | -884.195276291                                                                                   | -883.833206      | -883.814833 | -883.813889 | -883.882300 | -0.244015        | 0.0013                    |
| H <sup>+</sup>     | -0.177999562                                                                                     | -0.178000        | -0.176583   | -0.175639   | -0.187999   |                  |                           |



Tables of results in energies in  $\text{kJ}\cdot\text{mol}^{-1}$

Conversion factor from hartree to  $\text{kJ}\cdot\text{mol}^{-1}$ : 2625.499640

according to  $1 \text{ hartree} = (4.35974434 \cdot 10^{-18} \text{ J} * 6.02214129 \cdot 10^{23} \text{ mol}^{-1}) / 10^3$

with the fundamental constant values taken from the *National Institute of Standards and Technology* (NIST – USA).

| Species            | B3LYP/6-31+G(d) gas phase; T = 298.15 K; P = 1 atm |                                |             |             |             |                  |                           |
|--------------------|----------------------------------------------------|--------------------------------|-------------|-------------|-------------|------------------|---------------------------|
|                    | $E_{\text{elec}}$                                  | $E_{\text{elec}} + \text{ZPE}$ | E           | H           | G           | $\Delta G / H^+$ | $\Delta G^\ddagger / H^+$ |
| (R,S)-1            | -1816748.15                                        | -1815959.96                    | -1815919.31 | -1815916.83 | -1816077.09 |                  |                           |
| Ammonium (R,S)-1   | -1817783.95                                        | -1816956.31                    | -1816915.65 | -1816913.17 | -1817073.36 | <b>-970.01</b>   |                           |
| Pyridinium (R,S)-1 | -1817773.80                                        | -1816948.20                    | -1816907.75 | -1816905.27 | -1817064.33 | <b>-960.99</b>   |                           |
| (S,S)-1            | -1816755.48                                        | -1815967.00                    | -1815926.31 | -1815923.83 | -1816084.50 |                  |                           |
| Ammonium (S,S)-1   | -1817784.30                                        | -1816956.22                    | -1816915.58 | -1816913.11 | -1817073.61 | <b>-962.85</b>   |                           |
| Pyridinium (S,S)-1 | -1817754.33                                        | -1816928.41                    | -1816888.11 | -1816885.63 | -1817043.88 | <b>-933.13</b>   |                           |
| TS (R,S)-1         | -1817750.74                                        | -1816936.23                    | -1816896.43 | -1816893.96 | -1817051.62 | <b>-948.28</b>   | <b>12.71</b>              |
| TS (S,S)-1         | 0.00                                               | 0.00                           | 3.72        | 6.20        | -26.25      | <b>-939.79</b>   | <b>-6.66</b>              |
| H <sup>+</sup>     | 0.00                                               | 0.00                           | 3.72        | 6.20        | -26.25      |                  |                           |

| Species            | B3LYP/6-31+G(d) CH <sub>2</sub> Cl <sub>2</sub> solution (PCM-UFF); T = 298.15 K; P = 1 atm |                                |             |             |             |                  |                           |
|--------------------|---------------------------------------------------------------------------------------------|--------------------------------|-------------|-------------|-------------|------------------|---------------------------|
|                    | $E_{\text{elec}}$                                                                           | $E_{\text{elec}} + \text{ZPE}$ | E           | H           | G           | $\Delta G / H^+$ | $\Delta G^\ddagger / H^+$ |
| (R,S)-1            | -1816764.93                                                                                 | -1815977.11                    | -1815936.38 | -1815933.90 | -1816094.63 |                  |                           |
| Ammonium (R,S)-1   | -1817943.85                                                                                 | -1817114.62                    | -1817074.27 | -1817071.80 | -1817231.07 | <b>-721.55</b>   |                           |
| Pyridinium (R,S)-1 | -1817936.08                                                                                 | -1817110.17                    | -1817069.84 | -1817067.36 | -1817225.09 | <b>-715.57</b>   |                           |
| (S,S)-1            | -1816771.18                                                                                 | -1815983.32                    | -1815942.54 | -1815940.06 | -1816101.38 |                  |                           |
| Ammonium (S,S)-1   | -1817942.20                                                                                 | -1817112.62                    | -1817072.44 | -1817069.97 | -1817227.93 | <b>-711.65</b>   |                           |
| Pyridinium (S,S)-1 | -1817922.05                                                                                 | -1817095.64                    | -1817055.19 | -1817052.71 | -1817210.98 | <b>-694.71</b>   |                           |
| TS (R,S)-1         | -1817908.38                                                                                 | -1817093.39                    | -1817053.74 | -1817051.26 | -1817207.92 | <b>-698.40</b>   | <b>17.17</b>              |
| TS (S,S)-1         | -1817907.57                                                                                 | -1817091.32                    | -1817052.08 | -1817049.60 | -1817204.42 | <b>-688.15</b>   | <b>6.56</b>               |
| H <sup>+</sup>     | -388.64                                                                                     | -388.64                        | -384.92     | -382.44     | -414.89     |                  |                           |

| Species            | B3LYP/6-31+G(d,p) CH <sub>2</sub> Cl <sub>2</sub> solution (PCM-UFF); T = 298.15 K; P = 1 atm |                                |             |             |             |                  |                           |
|--------------------|-----------------------------------------------------------------------------------------------|--------------------------------|-------------|-------------|-------------|------------------|---------------------------|
|                    | $E_{\text{elec}}$                                                                             | $E_{\text{elec}} + \text{ZPE}$ | E           | H           | G           | $\Delta G / H^+$ | $\Delta G^\ddagger / H^+$ |
| (R,S)-1            | -1816838.02                                                                                   | -1816052.19                    | -1816011.39 | -1816008.91 | -1816169.67 |                  |                           |
| Ammonium (R,S)-1   | -1818023.12                                                                                   | -1817196.41                    | -1817156.00 | -1817153.53 | -1817312.72 | <b>-728.16</b>   |                           |
| Pyridinium (R,S)-1 | -1818017.92                                                                                   | -1817194.18                    | -1817153.77 | -1817151.29 | -1817309.22 | <b>-724.66</b>   |                           |
| (S,S)-1            | -1816844.11                                                                                   | -1816058.25                    | -1816017.38 | -1816014.90 | -1816176.39 |                  |                           |
| Ammonium (S,S)-1   | -1818021.41                                                                                   | -1817194.47                    | -1817154.21 | -1817151.73 | -1817309.93 | <b>-718.65</b>   |                           |
| Pyridinium (S,S)-1 | -1818003.55                                                                                   | -1817179.37                    | -1817138.79 | -1817136.31 | -1817295.02 | <b>-703.74</b>   |                           |
| TS (R,S)-1         | -1817994.36                                                                                   | -1817181.32                    | -1817141.60 | -1817139.12 | -1817296.07 | <b>-711.51</b>   | <b>13.15</b>              |
| TS (S,S)-1         | -1817993.47                                                                                   | -1817179.16                    | -1817139.87 | -1817137.39 | -1817292.21 | <b>-700.93</b>   | <b>2.81</b>               |
| H <sup>+</sup>     | -388.64                                                                                       | -388.64                        | -384.92     | -382.44     | -414.89     |                  |                           |

| Species            | B3LYP/6-31+G(d,p) CH <sub>2</sub> Cl <sub>2</sub> solution (CPCM-Bondi); T = 298.15 K; P = 1 atm |                                |             |             |             |                  |                           |
|--------------------|--------------------------------------------------------------------------------------------------|--------------------------------|-------------|-------------|-------------|------------------|---------------------------|
|                    | $E_{\text{elec}}$                                                                                | $E_{\text{elec}} + \text{ZPE}$ | E           | H           | G           | $\Delta G / H^+$ | $\Delta G^\ddagger / H^+$ |
| (R,S)-1            | -1816854.91                                                                                      | -1816069.53                    | -1816028.72 | -1816026.24 | -1816187.62 |                  |                           |
| Ammonium (R,S)-1   | -1818061.99                                                                                      | -1817236.51                    | -1817195.67 | -1817193.19 | -1817354.39 | <b>-673.18</b>   |                           |
| Pyridinium (R,S)-1 | -1818049.47                                                                                      | -1817227.73                    | -1817186.85 | -1817184.37 | -1817344.66 | <b>-663.45</b>   |                           |
| (S,S)-1            | -1816860.91                                                                                      | -1816075.64                    | -1816034.75 | -1816032.27 | -1816193.90 |                  |                           |
| Ammonium (S,S)-1   | -1818060.38                                                                                      | -1817234.35                    | -1817193.60 | -1817191.12 | -1817352.65 | <b>-665.16</b>   |                           |
| Pyridinium (S,S)-1 | -1818037.31                                                                                      | -1817213.77                    | -1817173.11 | -1817170.63 | -1817329.91 | <b>-642.41</b>   |                           |
| TS (R,S)-1         | -1818025.74                                                                                      | -1817213.57                    | -1817173.80 | -1817171.33 | -1817328.82 | <b>-647.61</b>   | <b>15.84</b>              |
| TS (S,S)-1         | -1818024.45                                                                                      | -1817211.66                    | -1817172.10 | -1817169.61 | -1817326.32 | <b>-638.83</b>   | <b>3.58</b>               |
| H <sup>+</sup>     | -467.34                                                                                          | -467.34                        | -463.62     | -461.14     | -493.59     |                  |                           |

| Species            | B3LYP/6-31+G(d) gas phase; T = 298.15 K; P = 1 atm |                  |             |             |             |                  |                           |
|--------------------|----------------------------------------------------|------------------|-------------|-------------|-------------|------------------|---------------------------|
|                    | $E_{elec}$                                         | $E_{elec} + ZPE$ | E           | H           | G           | $\Delta G / H^+$ | $\Delta G^\ddagger / H^+$ |
| (R,S)-2            | -2320168.59                                        | -2319241.72      | -2319192.64 | -2319190.16 | -2319372.33 |                  |                           |
| Ammonium (R,S)-2   | -2321211.91                                        | -2320245.79      | -2320196.66 | -2320194.18 | -2320377.47 | <b>-978.89</b>   |                           |
| Pyridinium (R,S)-2 | -2321196.61                                        | -2320232.91      | -2320183.96 | -2320181.48 | -2320363.04 | <b>-964.46</b>   |                           |
| (S,S)-2            | -2320167.28                                        | -2319240.46      | -2319191.25 | -2319188.77 | -2319372.13 |                  |                           |
| Ammonium (S,S)-2   | -2321210.79                                        | -2320244.46      | -2320195.32 | -2320192.84 | -2320375.52 | <b>-977.13</b>   |                           |
| Pyridinium (S,S)-2 | -2321175.94                                        | -2320212.09      | -2320163.10 | -2320160.62 | -2320341.37 | <b>-942.98</b>   |                           |
| TS (R,S)-2         | -2321173.45                                        | -2320220.41      | -2320172.12 | -2320169.64 | -2320350.59 | <b>-952.01</b>   | <b>12.45</b>              |
| TS (S,S)-2         | -2321173.11                                        | -2320220.07      | -2320171.72 | -2320169.24 | -2320351.01 | <b>-952.62</b>   | <b>-9.64</b>              |
| H <sup>+</sup>     | 0.00                                               | 0.00             | 3.72        | 6.20        | -26.25      |                  |                           |

| Species            | B3LYP/6-31+G(d) CH <sub>2</sub> Cl <sub>2</sub> solution (PCM-UFF); T = 298.15 K; P = 1 atm |                  |             |             |             |                  |                           |
|--------------------|---------------------------------------------------------------------------------------------|------------------|-------------|-------------|-------------|------------------|---------------------------|
|                    | $E_{elec}$                                                                                  | $E_{elec} + ZPE$ | E           | H           | G           | $\Delta G / H^+$ | $\Delta G^\ddagger / H^+$ |
| (R,S)-2            | -2320188.32                                                                                 | -2319261.84      | -2319212.66 | -2319210.18 | -2319393.46 |                  |                           |
| Ammonium (R,S)-2   | -2321361.86                                                                                 | -2320394.63      | -2320345.89 | -2320343.41 | -2320522.77 | <b>-714.41</b>   |                           |
| Pyridinium (R,S)-2 | -2321354.82                                                                                 | -2320390.17      | -2320341.51 | -2320339.03 | -2320518.40 | <b>-710.05</b>   |                           |
| (S,S)-2            | -2320187.49                                                                                 | -2319261.03      | -2319211.70 | -2319209.22 | -2319393.83 |                  |                           |
| Ammonium (S,S)-2   | -2321359.65                                                                                 | -2320391.82      | -2320343.11 | -2320340.63 | -2320519.67 | <b>-710.95</b>   |                           |
| Pyridinium (S,S)-2 | -2321339.29                                                                                 | -2320374.35      | -2320325.46 | -2320322.98 | -2320502.67 | <b>-693.95</b>   |                           |
| TS (R,S)-2         | -2321323.66                                                                                 | -2320370.44      | -2320322.14 | -2320319.65 | -2320500.76 | <b>-692.40</b>   | <b>17.64</b>              |
| TS (S,S)-2         | -2321323.83                                                                                 | -2320370.90      | -2320322.60 | -2320320.12 | -2320500.71 | <b>-691.99</b>   | <b>1.96</b>               |
| H <sup>+</sup>     | -388.64                                                                                     | -388.64          | -384.92     | -382.44     | -414.89     |                  |                           |

| Species            | B3LYP/6-31+G(d) CH <sub>2</sub> Cl <sub>2</sub> solution (PCM-UFF); T = 298.15 K; P = 1 atm |                  |             |             |             |                  |                           |
|--------------------|---------------------------------------------------------------------------------------------|------------------|-------------|-------------|-------------|------------------|---------------------------|
|                    | $E_{elec}$                                                                                  | $E_{elec} + ZPE$ | E           | H           | G           | $\Delta G / H^+$ | $\Delta G^\ddagger / H^+$ |
| (R,S)-2            | -2320271.61                                                                                 | -2319347.13      | -2319297.83 | -2319295.35 | -2319479.71 |                  |                           |
| Ammonium (R,S)-2   | -2321450.99                                                                                 | -2320485.69      | -2320437.02 | -2320434.54 | -2320613.60 | <b>-719.00</b>   |                           |
| Pyridinium (R,S)-2 | -2321446.53                                                                                 | -2320483.93      | -2320435.19 | -2320432.71 | -2320612.25 | <b>-717.65</b>   |                           |
| (S,S)-2            | -2320270.57                                                                                 | -2319346.01      | -2319296.60 | -2319294.12 | -2319479.03 |                  |                           |
| Ammonium (S,S)-2   | -2321448.68                                                                                 | -2320483.53      | -2320434.65 | -2320432.17 | -2320612.29 | <b>-718.37</b>   |                           |
| Pyridinium (S,S)-2 | -2321430.81                                                                                 | -2320467.94      | -2320418.95 | -2320416.47 | -2320596.46 | <b>-702.54</b>   |                           |
| TS (R,S)-2         | -2321419.51                                                                                 | -2320468.21      | -2320419.81 | -2320417.33 | -2320599.33 | <b>-704.73</b>   | <b>12.93</b>              |
| TS (S,S)-2         | -2321419.55                                                                                 | -2320468.56      | -2320420.17 | -2320417.69 | -2320598.46 | <b>-704.54</b>   | <b>-2.00</b>              |
| H <sup>+</sup>     | -388.64                                                                                     | -388.64          | -384.92     | -382.44     | -414.89     |                  |                           |

| Species            | B3LYP/6-31+G(d) CH <sub>2</sub> Cl <sub>2</sub> solution (CPCM-Bondi); T = 298.15 K; P = 1 atm |                  |             |             |             |                  |                           |
|--------------------|------------------------------------------------------------------------------------------------|------------------|-------------|-------------|-------------|------------------|---------------------------|
|                    | $E_{elec}$                                                                                     | $E_{elec} + ZPE$ | E           | H           | G           | $\Delta G / H^+$ | $\Delta G^\ddagger / H^+$ |
| (R,S)-2            | -2320291.11                                                                                    | -2319367.03      | -2319317.66 | -2319315.18 | -2319499.67 |                  |                           |
| Ammonium (R,S)-2   | -2321492.47                                                                                    | -2320528.58      | -2320479.34 | -2320476.86 | -2320661.68 | <b>-668.42</b>   |                           |
| Pyridinium (R,S)-2 | -2321481.89                                                                                    | -2320521.29      | -2320472.05 | -2320469.57 | -2320651.92 | <b>-658.66</b>   |                           |
| (S,S)-2            | -2320290.49                                                                                    | -2319366.39      | -2319317.03 | -2319314.55 | -2319498.41 |                  |                           |
| Ammonium (S,S)-2   | -2321490.49                                                                                    | -2320526.08      | -2320476.91 | -2320474.43 | -2320656.89 | <b>-664.89</b>   |                           |
| Pyridinium (S,S)-2 | -2321469.34                                                                                    | -2320506.76      | -2320457.65 | -2320455.17 | -2320636.08 | <b>-644.08</b>   |                           |
| TS (R,S)-2         | -2321455.32                                                                                    | -2320504.09      | -2320455.93 | -2320453.45 | -2320633.95 | <b>-640.68</b>   | <b>17.97</b>              |
| TS (S,S)-2         | -2321454.38                                                                                    | -2320503.76      | -2320455.53 | -2320453.05 | -2320632.66 | <b>-640.66</b>   | <b>3.42</b>               |
| H <sup>+</sup>     | -467.34                                                                                        | -467.34          | -463.62     | -461.14     | -493.59     |                  |                           |

### Thermodynamic equilibrium constants

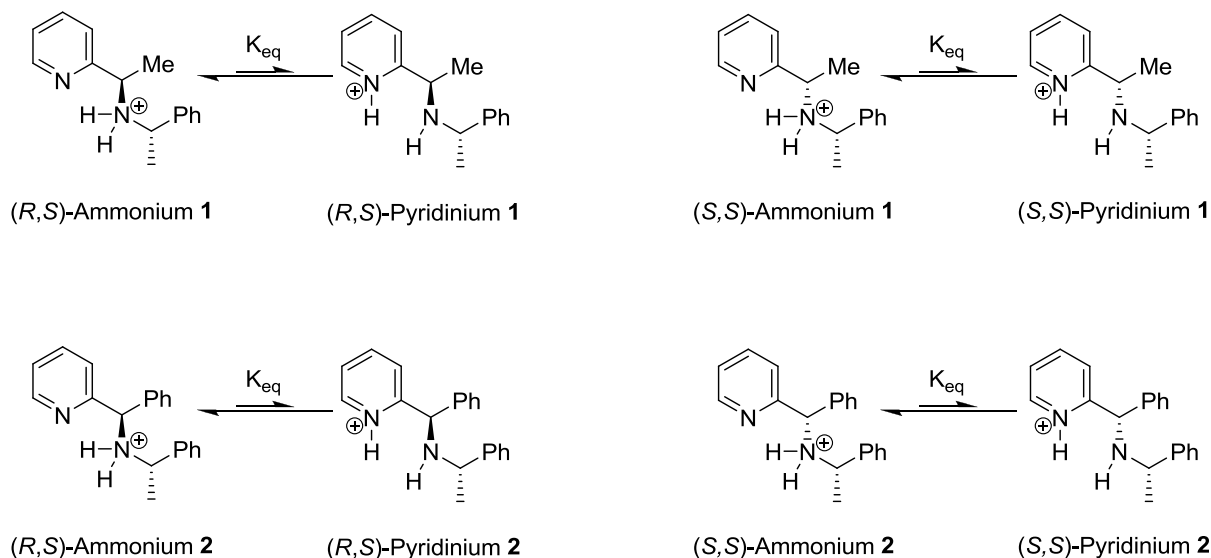

$K_{eq}$  of the reaction of the proton transfer from the ammonium to the pyridinium forms could be calculated starting from the formula  $\Delta G = -RT \ln(K_{eq})$  led to  $K_{eq} = \exp[-\Delta G / (RT)]$ .

With the fundamental constant values taken from the *National Institute of Standards and Technology* (NIST – USA)

Gaz constant  $R = 8.3144621 \text{ J}\cdot\text{mol}^{-1}\cdot\text{K}^{-1}$

1 hartree =  $4.35974434\cdot 10^{-18} \text{ J}$

Avogadro number  $N_A = 6.02214129\cdot 10^{23} \text{ mol}^{-1}$ ,

the temperature of  $T = 298.15 \text{ K}$ ,

and the previous results of the G value of protonated forms,

$K_{eq}$  values are ( $\text{kJ}\cdot\text{mol}^{-1}$ ):

| Equilibrium of protonated forms | B3LYP/6-31+G(d) |                                           | B3LYP/6-31+G(d,p)                         |                                              |
|---------------------------------|-----------------|-------------------------------------------|-------------------------------------------|----------------------------------------------|
|                                 | Gas phase       | CH <sub>2</sub> Cl <sub>2</sub> (PCM-UFF) | CH <sub>2</sub> Cl <sub>2</sub> (PCM-UFF) | CH <sub>2</sub> Cl <sub>2</sub> (CPCM-Bondi) |
| (R,S)-1                         | 38.139          | 11.14                                     | 4.11                                      | 50.55                                        |
| (S,S)-1                         | Not defined     | 929.33                                    | 408.97                                    | 9653.84                                      |
| (R,S)-2                         | 336.917         | 5.8139                                    | 1.72                                      | 51.36                                        |
| (S,S)-2                         | 962187          | 951.24                                    | 593.75                                    | 4418.18                                      |

### Define of geometric parameters

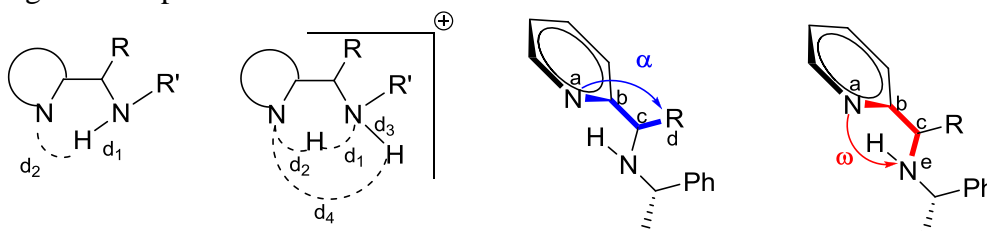

### Tables of results for the geometric parameters

| Distance in Å, angle in ° | B3LYP/6-31+G(d) gas phase; T = 298.15 K; P = 1 atm |                |                |                |            |           |
|---------------------------|----------------------------------------------------|----------------|----------------|----------------|------------|-----------|
| Species                   | d <sub>1</sub>                                     | d <sub>2</sub> | d <sub>3</sub> | d <sub>4</sub> | $\alpha$   | $\omega$  |
| (R,S)-1                   | 1.01849                                            | 2.48853        |                |                | -69.56543  | 56.89811  |
| Ammonium (R,S)-1          | 1.04669                                            | 1.88064        | 1.02607        | 2.99354        | -135.34601 | -12.35298 |
| Pyridinium (R,S)-1        | 2.01950                                            | 1.03559        | 1.01758        | 3.34604        | -112.56096 | 10.46497  |
| (S,S)-1                   | 1.01965                                            | 2.57669        |                |                | 73.93142   | -48.84058 |
| Ammonium (S,S)-1          | 1.04727                                            | 1.88877        | 1.02434        | 3.29073        | 105.86980  | -15.17614 |
| Pyridinium (S,S)-1        | 2.00188                                            | 1.03794        | 1.02196        | 2.83649        | 99.40882   | -22.45142 |
| TS (R,S)-1                | 1.37298                                            | 1.24089        | 1.02073        | 3.03579        | -120.53889 | 2.19647   |
| TS (S,S)-1                | 1.37246                                            | 1.24463        | 1.02121        | 2.99785        | 126.45676  | -0.45407  |

| Distance in Å, angle in ° | B3LYP/6-31+G(d) CH <sub>2</sub> Cl <sub>2</sub> (PCM-UFF); T = 298.15 K; P = 1 atm |                |                |                |            |           |
|---------------------------|------------------------------------------------------------------------------------|----------------|----------------|----------------|------------|-----------|
| Species                   | d <sub>1</sub>                                                                     | d <sub>2</sub> | d <sub>3</sub> | d <sub>4</sub> | $\alpha$   | $\omega$  |
| (R,S)-1                   | 1.01906                                                                            | 2.52405        |                |                | -70.51954  | 56.10800  |
| Ammonium (R,S)-1          | 1.04242                                                                            | 1.91618        | 1.02627        | 3.04176        | -137.28375 | -13.77467 |
| Pyridinium (R,S)-1        | 2.00078                                                                            | 1.03343        | 1.02053        | 3.01337        | -134.82025 | -8.05104  |
| (S,S)-1                   | 1.02004                                                                            | 2.58882        |                |                | 73.49464   | -49.59713 |
| Ammonium (S,S)-1          | 1.04442                                                                            | 1.89626        | 1.02509        | 3.13783        | 125.76684  | 2.98475   |
| Pyridinium (S,S)-1        | 2.10255                                                                            | 1.02944        | 1.02147        | 2.82929        | 96.29041   | -25.53704 |
| TS (R,S)-1                | 1.35572                                                                            | 1.25265        | 1.02088        | 3.01353        | -122.23773 | 0.61527   |
| TS (S,S)-1                | 1.35080                                                                            | 1.25930        | 1.02088        | 2.98669        | 122.58972  | -0.13596  |

| Distance in Å, angle in ° | B3LYP/6-31+G(d,p) CH <sub>2</sub> Cl <sub>2</sub> (PCM-UFF); T = 298.15 K; P = 1 atm |                |                |                |            |           |
|---------------------------|--------------------------------------------------------------------------------------|----------------|----------------|----------------|------------|-----------|
| Species                   | d <sub>1</sub>                                                                       | d <sub>2</sub> | d <sub>3</sub> | d <sub>4</sub> | $\alpha$   | $\omega$  |
| (R,S)-1                   | 1.01765                                                                              | 2.51826        |                |                | -70.84381  | 55.76633  |
| Ammonium (R,S)-1          | 1.04427                                                                              | 1.88560        | 1.02491        | 3.04020        | -136.79916 | -13.20326 |
| Pyridinium (R,S)-1        | 1.99226                                                                              | 1.03324        | 1.01924        | 3.01711        | -135.04387 | -8.18366  |
| (S,S)-1                   | 1.01865                                                                              | 2.59332        |                |                | 73.46326   | -49.66621 |
| Ammonium (S,S)-1          | 1.04629                                                                              | 1.86781        | 1.02378        | 3.12423        | 126.36969  | 3.52086   |
| Pyridinium (S,S)-1        | 2.09911                                                                              | 1.02873        | 1.02005        | 2.83069        | 96.39986   | -25.46248 |
| TS (R,S)-1                | 1.35274                                                                              | 1.24800        | 1.01986        | 3.01817        | -122.28236 | 0.60913   |
| TS (S,S)-1                | 1.34760                                                                              | 1.25464        | 1.01978        | 2.98986        | 122.71647  | -0.05352  |

| Distance in Å, angle in ° | B3LYP/6-31+G(d,p) CH <sub>2</sub> Cl <sub>2</sub> (CPCM-Bondi); T = 298.15 K; P = 1 atm |                |                |                |            |           |
|---------------------------|-----------------------------------------------------------------------------------------|----------------|----------------|----------------|------------|-----------|
| Species                   | d <sub>1</sub>                                                                          | d <sub>2</sub> | d <sub>3</sub> | d <sub>4</sub> | $\alpha$   | $\omega$  |
| (R,S)-1                   | 1.01838                                                                                 | 2.61051        |                |                | -69.54135  | 57.22133  |
| Ammonium (R,S)-1          | 1.03822                                                                                 | 1.95074        | 1.02478        | 3.05977        | -130.42015 | -7.04001  |
| Pyridinium (R,S)-1        | 2.02682                                                                                 | 1.03094        | 1.01893        | 3.02677        | -134.22463 | -7.52116  |
| (S,S)-1                   | 1.01898                                                                                 | 2.61339        |                |                | 73.23186   | -50.09890 |
| Ammonium (S,S)-1          | 1.03954                                                                                 | 1.93505        | 1.02377        | 3.15396        | 123.26196  | 0.52137   |
| Pyridinium (S,S)-1        | 2.14856                                                                                 | 1.02567        | 1.02044        | 2.81325        | 97.32065   | -24.97899 |
| TS (R,S)-1                | 1.36457                                                                                 | 1.23945        | 1.01953        | 3.03438        | -120.36977 | 2.36528   |
| TS (S,S)-1                | 1.35769                                                                                 | 1.24637        | 1.01971        | 2.97758        | 123.32255  | 0.46831   |

| Distance in Å. angle in ° | B3LYP/6-31+G(d) gas phase; T = 298.15 K; P = 1 atm |                |                |                |            |           |
|---------------------------|----------------------------------------------------|----------------|----------------|----------------|------------|-----------|
| Species                   | d <sub>1</sub>                                     | d <sub>2</sub> | d <sub>3</sub> | d <sub>4</sub> | α          | ω         |
| (R,S)-2                   | 1.01751                                            | 2.36455        |                |                | -84.53000  | 43.23568  |
| Ammonium (R,S)-2          | 1.04459                                            | 1.90554        | 1.02576        | 3.00388        | -139.88372 | -15.95430 |
| Pyridinium (R,S)-2        | 1.96429                                            | 1.03938        | 1.02024        | 3.10766        | -139.85077 | -11.41046 |
| (S,S)-2                   | 1.01874                                            | 2.54871        |                |                | 88.29038   | -36.62220 |
| Ammonium (S,S)-2          | 1.04559                                            | 1.89071        | 1.02555        | 3.08249        | 138.63885  | 14.55037  |
| Pyridinium (S,S)-2        | 2.00428                                            | 1.03689        | 1.02252        | 2.79721        | 103.34887  | -19.87789 |
| TS (R,S)-2                | 1.38176                                            | 1.23337        | 1.02071        | 3.03710        | -124.22927 | 0.05999   |
| TS (S,S)-2                | 1.38251                                            | 1.23720        | 1.02120        | 2.99638        | 126.52782  | 2.14765   |

| Distance in Å. angle in ° | B3LYP/6-31+G(d) CH <sub>2</sub> Cl <sub>2</sub> (PCM-UFF); T = 298.15 K; P = 1 atm |                |                |                |            |           |
|---------------------------|------------------------------------------------------------------------------------|----------------|----------------|----------------|------------|-----------|
| Species                   | d <sub>1</sub>                                                                     | d <sub>2</sub> | d <sub>3</sub> | d <sub>4</sub> | α          | ω         |
| (R,S)-2                   | 1.01787                                                                            | 2.40934        |                |                | -84.16588  | 43.80450  |
| Ammonium (R,S)-2          | 1.04146                                                                            | 1.94862        | 1.02581        | 3.04056        | -142.04270 | -17.37638 |
| Pyridinium (R,S)-2        | 2.03351                                                                            | 1.03183        | 1.02063        | 2.99108        | -141.58087 | -12.56760 |
| (S,S)-2                   | 1.01943                                                                            | 2.53527        |                |                | 87.72763   | -37.19588 |
| Ammonium (S,S)-2          | 1.04279                                                                            | 1.92511        | 1.02552        | 3.07461        | 139.83605  | 15.52783  |
| Pyridinium (S,S)-2        | 2.10693                                                                            | 1.02856        | 1.02202        | 2.78544        | 99.43917   | -23.28441 |
| TS (R,S)-2                | 1.35504                                                                            | 1.25227        | 1.02073        | 3.03021        | -123.36163 | 0.66180   |
| TS (S,S)-2                | 1.35156                                                                            | 1.25870        | 1.02086        | 2.97981        | 127.18821  | 2.78726   |

| Distance in Å. angle in ° | B3LYP/6-31+G(d,p) CH <sub>2</sub> Cl <sub>2</sub> (PCM-UFF); T = 298.15 K; P = 1 atm |                |                |                |            |           |
|---------------------------|--------------------------------------------------------------------------------------|----------------|----------------|----------------|------------|-----------|
| Species                   | d <sub>1</sub>                                                                       | d <sub>2</sub> | d <sub>3</sub> | d <sub>4</sub> | α          | ω         |
| (R,S)-2                   | 1.01656                                                                              | 2.40033        |                |                | -84.69754  | 43.18142  |
| Ammonium (R,S)-2          | 1.04254                                                                              | 1.92245        | 1.02442        | 3.03154        | -141.42333 | -16.73770 |
| Pyridinium (R,S)-2        | 2.02767                                                                              | 1.03142        | 1.01935        | 2.99511        | -141.57009 | -12.56540 |
| (S,S)-2                   | 1.01808                                                                              | 2.53859        |                |                | 87.61244   | -37.32497 |
| Ammonium (S,S)-2          | 1.04418                                                                              | 1.89954        | 1.02427        | 3.06755        | 139.60520  | 15.27407  |
| Pyridinium (S,S)-2        | 2.10544                                                                              | 1.02779        | 1.02061        | 2.78733        | 99.43041   | -23.28986 |
| TS (R,S)-2                | 1.35129                                                                              | 1.24819        | 1.01977        | 3.03253        | -123.49842 | 0.52794   |
| TS (S,S)-2                | 1.34790                                                                              | 1.25457        | 1.01990        | 2.97837        | 127.73562  | 3.28368   |

| Distance in Å. angle in ° | B3LYP/6-31+G(d,p) CH <sub>2</sub> Cl <sub>2</sub> (CPCM-Bondi); T = 298.15 K; P = 1 atm |                |                |                |            |           |
|---------------------------|-----------------------------------------------------------------------------------------|----------------|----------------|----------------|------------|-----------|
| Species                   | d <sub>1</sub>                                                                          | d <sub>2</sub> | d <sub>3</sub> | d <sub>4</sub> | α          | ω         |
| (R,S)-2                   | 1.01701                                                                                 | 2.48420        |                |                | -82.37266  | 45.90215  |
| Ammonium (R,S)-2          | 1.03762                                                                                 | 1.97171        | 1.02462        | 3.04772        | -140.72830 | -15.81479 |
| Pyridinium (R,S)-2        | 2.05264                                                                                 | 1.02926        | 1.01905        | 2.97415        | -141.81340 | -12.92614 |
| (S,S)-2                   | 1.01833                                                                                 | 2.57305        |                |                | 87.88137   | -37.51853 |
| Ammonium (S,S)-2          | 1.03947                                                                                 | 1.94656        | 1.02364        | 3.10519        | 137.62622  | 12.89754  |
| Pyridinium (S,S)-2        | 2.16899                                                                                 | 1.02467        | 1.02057        | 2.75508        | 100.01718  | -23.14155 |
| TS (R,S)-2                | 1.36244                                                                                 | 1.23989        | 1.01987        | 3.02898        | -123.83155 | 0.35909   |
| TS (S,S)-2                | 1.35664                                                                                 | 1.24696        | 1.01955        | 2.96122        | 127.96572  | 3.57947   |

## Example of Gaussian 09 input file

```
%mem=1GB
%nproc=1
#p B3LYP/6-31+G(d,p) opt=(CalcFC, tight, TS, Noeigentest) SCRF=(CPCM, read, solvent=dichloromethane)
gfprint pop=full freq
```

```
TS (R,S)-Py,Me,Me,Ph with H+ B3LYP/6-31+G(d,p) in CH2Cl2 CPCM-Bondi opt
```

```
1 1
```

```
6      1.461675  1.446406  0.058044
7      0.110182  0.938650 -0.319529
1     -0.194904  1.353106 -1.199631
6     -0.968475  1.055446  0.714736
1     -0.536518  0.641589  1.631035
6     -1.368106  2.515135  0.966078
1     -2.128518  2.560004  1.751222
1     -0.508609  3.108744  1.291770
1     -1.781146  2.973630  0.061978
6     -2.142296  0.172967  0.313706
6     -2.448163 -0.967730  1.069956
6     -2.937338  0.472813 -0.804700
6     -3.523652 -1.792110  0.721423
1     -1.843683 -1.211217  1.940171
6     -4.007673 -0.352921 -1.159906
1     -2.729357  1.354990 -1.404847
6     -4.305309 -1.487609 -0.396803
1     -3.747842 -2.668775  1.322274
1     -4.611405 -0.107338 -2.028826
1     -5.140290 -2.125851 -0.670582
6      2.352345  0.195751  0.044685
6      3.702930  0.101522  0.369932
6      4.309338 -1.153082  0.280266
1      4.260709  0.976278  0.684791
6      2.220928 -2.102772 -0.433834
6      3.565877 -2.269140 -0.127309
1      5.359933 -1.264352  0.528425
1      1.580087 -2.917279 -0.751989
1      4.021149 -3.249711 -0.202474
7      1.662887 -0.885987 -0.337277
1      1.427208  1.832311  1.081409
1      0.563155 -0.336502 -0.495112
6      1.971247  2.542348 -0.883070
1      2.982151  2.845623 -0.597995
1      1.997253  2.185892 -1.918045
1      1.319166  3.418080 -0.825150
```

```
Radii=Bondi
```
